# Supplementary material for: DFT study on 1,7-octadiene polymerization catalyzed by a non-bridged half-titanocene system
Source: Royal Society of Chemistry journal article supplement (doi:10.1039/c6ra14867k), 2016-01-01
Supplement: c6ra14867k1.pdf [file c6ra14867k1.pdf]

*Supporting Information for*

**DFT Study on 1,7-Octadiene Polymerization Catalyzed by Non-Bridged Half-Titanocene System**

Yu Pan,<sup>a</sup> Xiaowei Xu,<sup>a</sup> Ning-Ning Wei,<sup>b</sup> Ce Hao,<sup>a</sup> Xiaodong Zhu,<sup>c</sup> Gaohong He<sup>\*,a</sup>

<sup>a</sup>State Key Laboratory of Fine Chemicals, School of Petroleum and Chemical Engineering, Dalian University of Technology, Panjin 124221, P. R. China

<sup>b</sup>School of Life Science and Medicine, Dalian University of Technology, Panjin 124221, P. R. China

<sup>c</sup>SINOPEC Zhenhai Refining and Chemical Company, Ningbo 315207, P. R. China

\*Corresponding author. E-mail: hgaohong@dlut.edu.cn (G. H.)

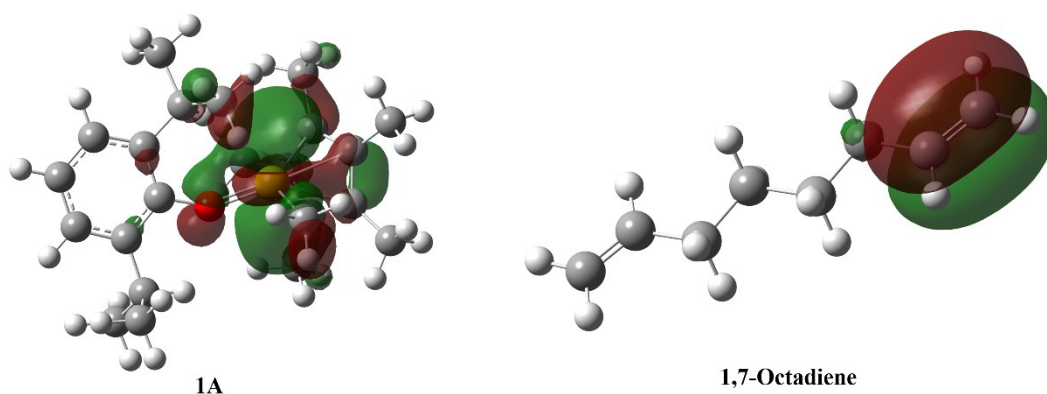

**Fig. S1.** Structures of LUMO of active species **1A** and HOMO of 1,7-octadiene (OD).

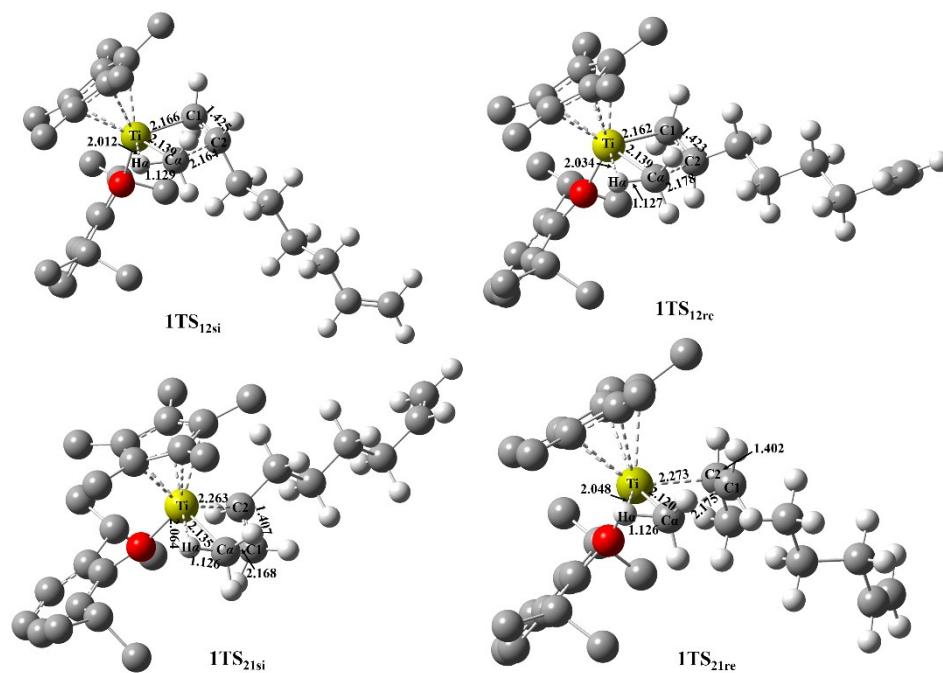

**Fig. S2.** Geometric structures (distance in Å) and their corresponding free energy relative to the energy sum of **1A** and OD of the transition states derived from four insertion modes. Hydrogen atoms of the C<sub>5</sub>Me<sub>5</sub> ligand and phenoxy have been omitted for clarity.

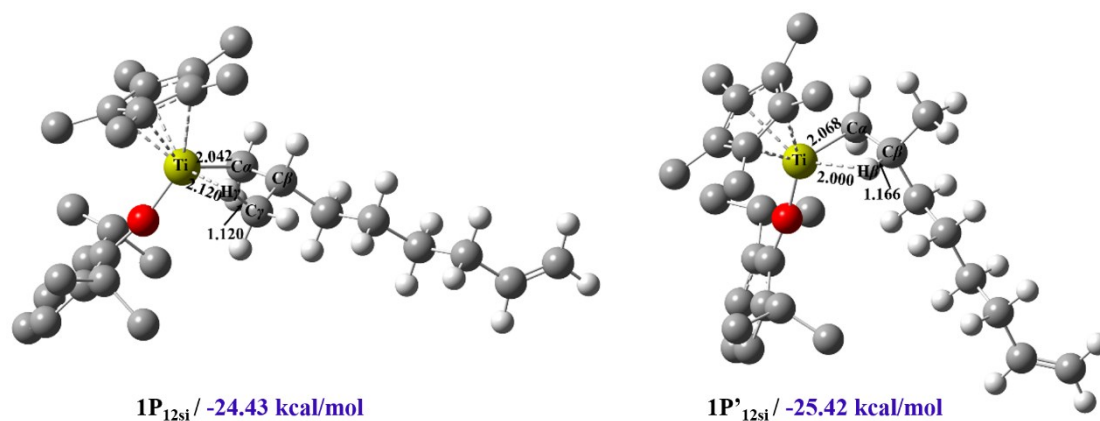

**Fig. S3.** Optimized structures (distances in Å) of direct product (**1P**<sub>12si</sub>) and its isomer (**1P'**<sub>12si</sub>) and their corresponding energies relative to the summation of the energies energy of **1A** and OD. Hydrogen atoms of the C<sub>5</sub>Me<sub>5</sub> ligand and phenoxy have been omitted for clarity.

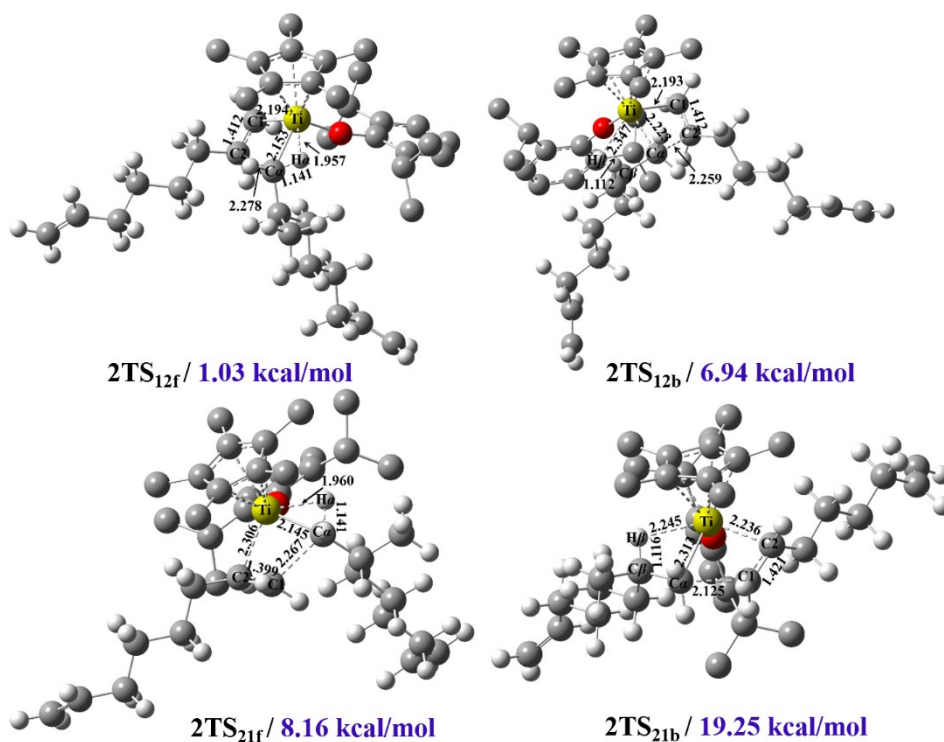

**Fig. S4.** Geometric structures (distance in Å) and their corresponding free energy relative to the energy sum of **2A** and 1,7-octadiene of the transition states derived from 1,2-*f*-, 1,2-*b*-, 2,1-*f*- and 2,1-*b*-insertion. Hydrogen atoms of the C<sub>5</sub>Me<sub>5</sub> ligand and phenoxyl have been omitted for clarity.

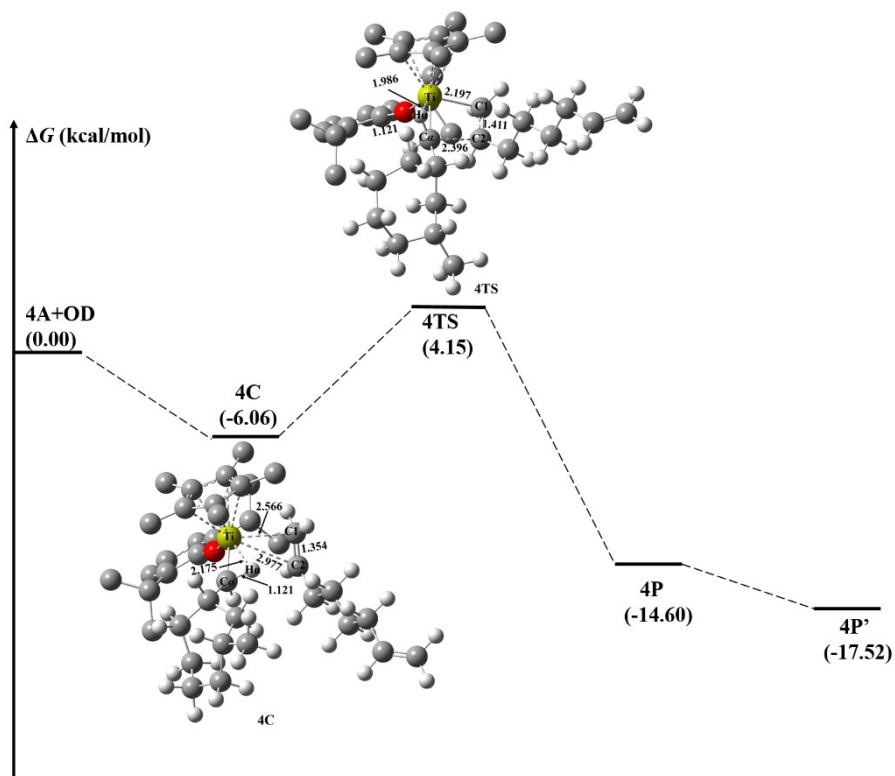

**Fig. S5.** Computed energy profiles (energy in kcal/mol) and geometric structures (distance in Å) for repeated insertion of OD into **4A**. Hydrogen atoms of the C<sub>5</sub>Me<sub>5</sub> ligand and phenoxyl have been omitted for clarity.

**Table S1** Optimized Cartesian coordinates (Å) and zero-point energy corrected energy (a.u.) of cationic species **1A**, **2A**, **3A**, **4A** and **7A**.

| Atom                     | x           | y           | z           |
|--------------------------|-------------|-------------|-------------|
| <b>1A, -1029.9712169</b> |             |             |             |
| Ti                       | -0.98543800 | -0.17346000 | -0.50103000 |
| O                        | 0.75669800  | -0.34095600 | -0.18322700 |
| C                        | -2.73692100 | 0.87028100  | 0.72233100  |
| C                        | -3.40079400 | 0.09011100  | -0.28417000 |
| C                        | -3.07113300 | -1.27616900 | -0.07312900 |
| C                        | -2.17102300 | -1.34140700 | 1.05256000  |
| C                        | -2.00214100 | -0.01668100 | 1.56921500  |
| C                        | 2.00315900  | 0.22656300  | -0.08210100 |
| C                        | 2.06166700  | 1.63891400  | -0.08527600 |
| C                        | 4.37978500  | 0.05378900  | 0.04125900  |
| C                        | 3.13908000  | -0.59578900 | -0.01506300 |
| C                        | -2.91043900 | 2.35090300  | 0.92342500  |
| C                        | -4.33295100 | 0.62050300  | -1.33589900 |
| C                        | -3.66322600 | -2.45201100 | -0.78954800 |
| C                        | -1.62322100 | -2.60425800 | 1.66018400  |
| C                        | 0.76365600  | 2.43688400  | -0.13520800 |
| C                        | 0.05792800  | 2.34571900  | -1.51147700 |
| C                        | 0.91348000  | 3.91541100  | 0.25323000  |
| C                        | 3.03832900  | -2.11449600 | -0.01636400 |
| C                        | 3.67617600  | -2.72890900 | 1.24470700  |
| C                        | 3.65195100  | -2.71263500 | -1.29818800 |
| C                        | 3.32402100  | 2.23056800  | -0.02951400 |
| C                        | 4.47592900  | 1.44225900  | 0.03100700  |
| C                        | -1.23454800 | 0.35087300  | 2.80925900  |
| H                        | 0.09535500  | 1.99089400  | 0.62397700  |
| H                        | 1.97429900  | -2.37344300 | -0.00794000 |
| C                        | -1.15149900 | -1.20675600 | -2.28342100 |
| H                        | -2.07661600 | -1.06121500 | -2.84682700 |
| H                        | -0.29076500 | -0.87461100 | -2.87968600 |
| H                        | -1.02473300 | -2.27964000 | -2.08783600 |
| H                        | -4.60060100 | -2.74428600 | -0.30089600 |
| H                        | -3.89660100 | -2.22790800 | -1.83267100 |
| H                        | -3.00298700 | -3.32195900 | -0.76988500 |
| H                        | -2.35579700 | -3.03168600 | 2.35564200  |
| H                        | -1.41187500 | -3.36701000 | 0.90587100  |
| H                        | -0.70502300 | -2.42221600 | 2.22270000  |
| H                        | -1.86198300 | 0.19958700  | 3.69578700  |
| H                        | -0.33899800 | -0.26267400 | 2.93444000  |
| H                        | -0.92453800 | 1.39850500  | 2.80834700  |
| H                        | -3.81762800 | 2.53783600  | 1.51088100  |

|                          |             |             |             |
|--------------------------|-------------|-------------|-------------|
| H                        | -2.07736300 | 2.79807000  | 1.47014500  |
| H                        | -3.02918000 | 2.88845400  | -0.02134500 |
| H                        | -5.35951200 | 0.65103700  | -0.95053100 |
| H                        | -4.07665700 | 1.63837600  | -1.64188800 |
| H                        | -4.34182000 | -0.00927800 | -2.22865500 |
| H                        | 3.41939900  | 3.31052200  | -0.02821000 |
| H                        | 5.45065200  | 1.91757400  | 0.07437400  |
| H                        | 5.28560200  | -0.54231400 | 0.09268200  |
| H                        | 3.22997700  | -2.32422600 | 2.15869500  |
| H                        | 3.53684800  | -3.81462300 | 1.24882200  |
| H                        | 4.75302100  | -2.53619900 | 1.28622800  |
| H                        | 3.52811400  | -3.80028900 | -1.30783200 |
| H                        | 3.17669200  | -2.30760100 | -2.19718800 |
| H                        | 4.72411100  | -2.50029300 | -1.36332900 |
| H                        | 0.65023200  | 2.84596100  | -2.28450400 |
| H                        | -0.03964200 | 1.31777400  | -1.91179600 |
| H                        | -0.92654300 | 2.82586100  | -1.49196100 |
| H                        | 1.38953000  | 4.02215500  | 1.23126100  |
| H                        | 1.51412400  | 4.46076100  | -0.48128100 |
| H                        | -0.06664300 | 4.39984300  | 0.29597600  |
| <b>2A, -1342.8923076</b> |             |             |             |
| Ti                       | 1.17985500  | -0.80575700 | -0.06295200 |
| O                        | 0.42817200  | 0.80308000  | -0.05754800 |
| C                        | 2.45962300  | -1.21514600 | 1.83987500  |
| C                        | 2.44162200  | -2.45039300 | 1.10514300  |
| C                        | 3.11774700  | -2.23676800 | -0.13480800 |
| C                        | 3.50880900  | -0.85995000 | -0.18630100 |
| C                        | 3.12931100  | -0.23482600 | 1.04996500  |
| C                        | 0.02178800  | 2.11117000  | 0.04172800  |
| C                        | -0.70241300 | 2.51374000  | 1.18476600  |
| C                        | -0.11750900 | 4.31003700  | -0.90711700 |
| C                        | 0.33428700  | 2.99153100  | -1.01861600 |
| C                        | 1.92394600  | -1.02243400 | 3.23238200  |
| C                        | 1.95660900  | -3.77135900 | 1.63952400  |
| C                        | 3.49634900  | -3.29089300 | -1.13261200 |
| C                        | 4.28201900  | -0.20925900 | -1.29951300 |
| C                        | -1.05047100 | 1.55414400  | 2.31536100  |
| C                        | -2.56158500 | 1.24808100  | 2.34208700  |
| C                        | -0.57075600 | 2.07210100  | 3.68476800  |
| C                        | 1.09844800  | 2.53247200  | -2.25409100 |
| C                        | 2.23973300  | 3.49170100  | -2.63936400 |
| C                        | 0.13898400  | 2.31157600  | -3.44179800 |
| C                        | -1.12872500 | 3.84528500  | 1.23441600  |
| C                        | -0.84300200 | 4.73678600  | 0.20340400  |

|   |             |             |             |
|---|-------------|-------------|-------------|
| C | 3.43581200  | 1.17920800  | 1.45577100  |
| H | -0.52905200 | 0.60766000  | 2.12558800  |
| H | 1.55818500  | 1.56475300  | -2.02197800 |
| H | 4.46634500  | -3.72534700 | -0.86143000 |
| H | 2.77555400  | -4.11114800 | -1.16583300 |
| H | 3.59631300  | -2.88555800 | -2.14226700 |
| H | 5.35851100  | -0.34068400 | -1.13407600 |
| H | 4.04646100  | -0.64694300 | -2.27272500 |
| H | 4.09401200  | 0.86555900  | -1.35688700 |
| H | 3.48705400  | 1.85033500  | 0.59541900  |
| H | 2.68802000  | 1.58046800  | 2.14334100  |
| H | 4.40725400  | 1.22167300  | 1.96269900  |
| H | 2.67122500  | -1.34699300 | 3.96697100  |
| H | 1.69402200  | 0.02358100  | 3.44376600  |
| H | 1.02140200  | -1.61261400 | 3.41710800  |
| H | 2.75077400  | -4.24932400 | 2.22586400  |
| H | 1.09348800  | -3.66015800 | 2.30127300  |
| H | 1.68282200  | -4.46494400 | 0.84213500  |
| H | -1.69569700 | 4.18896700  | 2.09402500  |
| H | -1.18514600 | 5.76505800  | 0.26502100  |
| H | 0.09931500  | 5.01459700  | -1.70352500 |
| H | 2.92087000  | 3.66623900  | -1.80012800 |
| H | 2.81840600  | 3.07510700  | -3.47011200 |
| H | 1.86207600  | 4.46503700  | -2.96681100 |
| H | 0.68337000  | 1.93688300  | -4.31521100 |
| H | -0.64952100 | 1.59364600  | -3.19309800 |
| H | -0.34875400 | 3.24897600  | -3.72827700 |
| H | -3.14188000 | 2.15412000  | 2.54345100  |
| H | -2.90428100 | 0.84184800  | 1.38534000  |
| H | -2.79499600 | 0.52225000  | 3.12831900  |
| H | 0.50136000  | 2.29507800  | 3.68036800  |
| H | -1.09352500 | 2.98931400  | 3.97250400  |
| H | -0.76509100 | 1.32857200  | 4.46463400  |
| C | -0.49466700 | -2.26098600 | -1.14290000 |
| C | 0.67540000  | -1.63387200 | -1.88930400 |
| H | 0.37943400  | -0.82552800 | -2.56357500 |
| H | 1.32639000  | -2.34891600 | -2.38724300 |
| C | -1.84687500 | -1.56386900 | -1.41528000 |
| H | -1.69988400 | -0.47744500 | -1.38516400 |
| H | -2.12284900 | -1.80849600 | -2.44941100 |
| C | -2.99233000 | -1.94528300 | -0.46927200 |
| H | -3.18186700 | -3.02442800 | -0.51920100 |
| H | -2.69562900 | -1.73144900 | 0.56914500  |
| C | -4.29373700 | -1.19697000 | -0.78916700 |

|   |             |             |             |
|---|-------------|-------------|-------------|
| H | -4.11680600 | -0.11352900 | -0.73409300 |
| H | -4.59099700 | -1.40461200 | -1.82494600 |
| C | -5.45424700 | -1.57398100 | 0.15089700  |
| H | -5.65103700 | -2.65101200 | 0.07969100  |
| H | -5.14258100 | -1.37984600 | 1.18856800  |
| C | -6.71613900 | -0.80870600 | -0.14500700 |
| H | -6.64964700 | 0.27581200  | -0.04510700 |
| C | -7.87211800 | -1.35575600 | -0.52024200 |
| H | -7.98542200 | -2.43182700 | -0.63134600 |
| H | -8.75068400 | -0.75135500 | -0.72413300 |
| C | -0.55394800 | -3.79054400 | -1.28538600 |
| H | -0.87336200 | -4.03857800 | -2.30231100 |
| H | 0.42439600  | -4.24751100 | -1.12210800 |
| H | -1.26288200 | -4.24014000 | -0.58652600 |
| H | -0.32946200 | -2.11616200 | 0.00175400  |

| Atom                     | x           | y           | z           |
|--------------------------|-------------|-------------|-------------|
| <b>3A, -1655.7949964</b> |             |             |             |
| Ti                       | -0.90481900 | -1.30598500 | -0.02055900 |
| O                        | -1.97869500 | 0.09277400  | 0.21363500  |
| C                        | -0.24432500 | -3.65949800 | 0.12016400  |
| C                        | 0.20398900  | -2.95800100 | 1.27974100  |
| C                        | -0.95121400 | -2.46408500 | 1.97454400  |
| C                        | -2.10833900 | -2.82401200 | 1.21999000  |
| C                        | -1.66689400 | -3.54965200 | 0.05874500  |
| C                        | -2.96645200 | 1.00098100  | 0.51365500  |
| C                        | -4.15020400 | 0.98787100  | -0.26081200 |
| C                        | -3.76989900 | 2.84784700  | 1.82067400  |
| C                        | -2.75584700 | 1.91755500  | 1.56781200  |
| C                        | 0.60657400  | -4.47727600 | -0.80539400 |
| C                        | 1.62018700  | -2.87564800 | 1.78342800  |
| C                        | -0.94264300 | -1.78108800 | 3.31348000  |
| C                        | -3.53622400 | -2.58531000 | 1.62495700  |
| C                        | -4.36214800 | 0.00900300  | -1.40899400 |
| C                        | -4.10194400 | 0.69306300  | -2.76721400 |
| C                        | -5.75537900 | -0.64684000 | -1.38741200 |
| C                        | -1.47277200 | 1.94938500  | 2.38814400  |
| C                        | -1.74550900 | 1.88519800  | 3.90321500  |
| C                        | -0.62759800 | 3.19208500  | 2.04233800  |
| C                        | -5.12596500 | 1.94155900  | 0.04477400  |
| C                        | -4.94270300 | 2.86549700  | 1.07102000  |
| C                        | -2.55531000 | -4.20610500 | -0.95882900 |
| H                        | -3.62699300 | -0.79649000 | -1.30128500 |

|   |             |             |             |
|---|-------------|-------------|-------------|
| H | -0.88231200 | 1.06408700  | 2.12279500  |
| H | -0.88817000 | -2.53083000 | 4.11240500  |
| H | -0.08282500 | -1.11719500 | 3.44068900  |
| H | -1.84825300 | -1.19491400 | 3.47691900  |
| H | -3.86823600 | -3.37740400 | 2.30691600  |
| H | -3.66547000 | -1.63044400 | 2.14000000  |
| H | -4.20974600 | -2.59379300 | 0.76536400  |
| H | -3.48660100 | -3.65452500 | -1.10883000 |
| H | -2.06266100 | -4.30548100 | -1.92874200 |
| H | -2.82639000 | -5.21517000 | -0.62454400 |
| H | 0.56363400  | -5.53203900 | -0.50652000 |
| H | 0.26468200  | -4.42777600 | -1.84257100 |
| H | 1.65588600  | -4.17710700 | -0.77494500 |
| H | 1.82738600  | -3.71571800 | 2.45761700  |
| H | 2.35161800  | -2.91803300 | 0.97401000  |
| H | 1.80332900  | -1.95951700 | 2.35181700  |
| H | -6.04476000 | 1.96354100  | -0.53211700 |
| H | -5.71410400 | 3.59823400  | 1.28608600  |
| H | -3.63638700 | 3.57293500  | 2.61728700  |
| H | -2.36646200 | 1.02449900  | 4.16952900  |
| H | -0.80387500 | 1.81376000  | 4.45732800  |
| H | -2.26142200 | 2.78350400  | 4.25561800  |
| H | 0.32041300  | 3.17967600  | 2.59095900  |
| H | -0.40739700 | 3.24186700  | 0.97225700  |
| H | -1.15684900 | 4.11138500  | 2.31285900  |
| H | -4.81749200 | 1.50425700  | -2.93658200 |
| H | -3.09799900 | 1.12725900  | -2.81478100 |
| H | -4.20736200 | -0.02321100 | -3.58928600 |
| H | -5.96728400 | -1.11456100 | -0.42073900 |
| H | -6.55104100 | 0.07739500  | -1.58623300 |
| H | -5.82141000 | -1.41626100 | -2.16362000 |
| C | 3.21881100  | -0.78295900 | -2.45525700 |
| C | 1.78517800  | -1.33449500 | -2.60886500 |
| H | 1.78917900  | -2.39230600 | -2.32116000 |
| H | 1.51917500  | -1.31455100 | -3.67309300 |
| C | 3.73243700  | -0.87342300 | -1.00438600 |
| H | 2.99195200  | -0.43317500 | -0.32086700 |
| H | 3.81170200  | -1.93546800 | -0.72565400 |
| C | 5.07954800  | -0.18350000 | -0.74185600 |
| H | 5.86513000  | -0.65624200 | -1.34325200 |
| H | 5.02386500  | 0.86139900  | -1.07898800 |
| C | 5.49194700  | -0.21823200 | 0.73544000  |
| H | 4.72147800  | 0.28080000  | 1.34156100  |
| H | 5.53040600  | -1.25883800 | 1.08468800  |



|                          |             |             |             |
|--------------------------|-------------|-------------|-------------|
| C                        | 6.85555300  | 0.44693000  | 1.00268100  |
| H                        | 7.63517200  | -0.07040400 | 0.42998200  |
| H                        | 6.82188000  | 1.47944600  | 0.62413400  |
| C                        | 7.22360300  | 0.46068300  | 2.46180600  |
| H                        | 6.54925000  | 1.01506700  | 3.11696900  |
| C                        | 8.28364500  | -0.14952600 | 2.99180500  |
| H                        | 8.98561800  | -0.70948500 | 2.37797900  |
| H                        | 8.49689700  | -0.10501100 | 4.05559400  |
| C                        | 4.13501000  | -1.53873100 | -3.43427300 |
| H                        | 4.19153200  | -2.60395300 | -3.17876200 |
| H                        | 3.76451100  | -1.46146900 | -4.46160800 |
| H                        | 5.15218700  | -1.14003900 | -3.42320200 |
| H                        | 3.22121300  | 0.27198500  | -2.75812400 |
| C                        | 0.60049200  | -0.63866300 | -1.88138600 |
| H                        | 0.89910600  | -0.66136700 | -0.76446200 |
| C                        | -0.68382600 | -1.45451700 | -2.06587900 |
| H                        | -1.47825500 | -0.90273200 | -2.57267800 |
| H                        | -0.53044500 | -2.42715100 | -2.52912700 |
| C                        | 0.40981800  | 0.86305800  | -2.22260800 |
| H                        | 0.61515600  | 0.97431400  | -3.29533500 |
| H                        | -0.64637700 | 1.12270100  | -2.08747100 |
| C                        | 1.24793200  | 1.87516000  | -1.42694700 |
| H                        | 2.31728900  | 1.67166000  | -1.54087100 |
| H                        | 1.02892300  | 1.76327400  | -0.35402800 |
| C                        | 0.96753000  | 3.32310400  | -1.85289400 |
| H                        | 1.12714700  | 3.41715600  | -2.93571400 |
| H                        | -0.08958200 | 3.56409500  | -1.67938700 |
| C                        | 1.85026500  | 4.35323600  | -1.12276200 |
| H                        | 2.90526300  | 4.10007200  | -1.30655100 |
| H                        | 1.69499800  | 4.27659000  | -0.03914900 |
| C                        | 1.58940300  | 5.76588000  | -1.57163000 |
| H                        | 1.76479900  | 5.96833900  | -2.62918200 |
| C                        | 1.16333500  | 6.75330200  | -0.78424900 |
| H                        | 0.97938000  | 6.59885900  | 0.27678800  |
| H                        | 0.99120200  | 7.75494600  | -1.16603800 |
| <b>4A, -1655.7949964</b> |             |             |             |
| O                        | 1.05415300  | -0.16674500 | -0.09098500 |
| C                        | -1.29065300 | 3.12899500  | -0.25610100 |
| C                        | 0.09748100  | 3.13516200  | -0.61010900 |
| C                        | 0.86671400  | 2.84466300  | 0.56707100  |
| C                        | -0.05125200 | 2.60567300  | 1.63178800  |
| C                        | -1.38531600 | 2.77101500  | 1.12294900  |
| C                        | -2.41682000 | 3.58358700  | -1.13654300 |
| C                        | 0.65531500  | 3.49811600  | -1.95840600 |

|    |             |             |             |
|----|-------------|-------------|-------------|
| C  | 2.36612000  | 2.85353300  | 0.66342700  |
| C  | 0.30055200  | 2.30672300  | 3.06362400  |
| C  | -2.63945700 | 2.75178600  | 1.95487900  |
| C  | 2.25864400  | -0.82519600 | -0.13237100 |
| C  | 2.90462500  | -0.95715800 | -1.38294200 |
| C  | 4.11536000  | -1.65560400 | -1.40553700 |
| C  | 4.66133200  | -2.19815600 | -0.24360800 |
| C  | 4.00269900  | -2.04578000 | 0.97352000  |
| C  | 2.79019800  | -1.35327900 | 1.06402000  |
| C  | 2.29368700  | -0.40415200 | -2.66435100 |
| C  | 2.08075500  | -1.22297500 | 2.40557700  |
| H  | -2.54493200 | 4.66886100  | -1.04129600 |
| H  | -3.36942000 | 3.12301200  | -0.86494400 |
| H  | -2.22579200 | 3.37360500  | -2.19169700 |
| H  | 0.78132800  | 4.58547000  | -2.03124200 |
| H  | -0.00740800 | 3.19259700  | -2.77204800 |
| H  | 1.63553700  | 3.04786200  | -2.13211400 |
| H  | 2.73007200  | 2.20417100  | 1.46227100  |
| H  | 2.72125600  | 3.86897000  | 0.87616400  |
| H  | 2.83988300  | 2.52987400  | -0.26630500 |
| H  | 0.28221800  | 3.23220400  | 3.65228800  |
| H  | 1.29993900  | 1.87916500  | 3.16144900  |
| H  | -0.41008400 | 1.61953500  | 3.53277700  |
| H  | -3.52487500 | 2.51425700  | 1.36243200  |
| H  | -2.80298900 | 3.73919300  | 2.40359400  |
| H  | -2.58070100 | 2.03319100  | 2.77676200  |
| Ti | -0.33569800 | 0.93558600  | 0.02640200  |
| C  | 3.32478100  | 0.27831200  | -3.58080900 |
| H  | 3.89324600  | 1.04710100  | -3.04775500 |
| H  | 4.04090300  | -0.43737400 | -3.99586000 |
| H  | 2.81860500  | 0.75223100  | -4.42786000 |
| C  | 1.53065900  | -1.50978400 | -3.42374700 |
| H  | 0.76267900  | -1.97241100 | -2.79532800 |
| H  | 1.04684600  | -1.10323000 | -4.31849900 |
| H  | 2.21487900  | -2.30252500 | -3.74346400 |
| H  | 4.63961200  | -1.78031300 | -2.34716900 |
| H  | 5.60120300  | -2.73936700 | -0.28785100 |
| H  | 4.43710400  | -2.47395600 | 1.87153000  |
| C  | -2.00961200 | -2.00759900 | -0.49364200 |
| C  | -1.64437200 | 0.33109100  | -1.45508200 |
| H  | -2.29955100 | 1.03754400  | -1.95931400 |
| H  | -1.07567700 | -0.26763600 | -2.17199700 |
| H  | -2.17871600 | -2.28480900 | -1.54131500 |
| C  | -5.23450500 | -2.25921300 | -0.30821200 |

|   |             |             |             |
|---|-------------|-------------|-------------|
| C | -4.81569600 | -0.94064400 | -0.97830100 |
| C | -3.80963600 | -0.12237300 | -0.14513300 |
| C | -4.16616100 | -3.35841500 | -0.23066200 |
| C | -2.32216600 | -0.49369000 | -0.36792100 |
| C | -2.80979000 | -2.97970100 | 0.40373600  |
| H | -5.59090800 | -2.02767200 | 0.70539300  |
| H | -4.42413800 | -1.12140200 | -1.98789900 |
| H | -4.06516100 | -0.24423000 | 0.91395200  |
| H | -3.96696500 | -3.74448400 | -1.24082600 |
| H | -6.10077100 | -2.66528000 | -0.84336600 |
| H | -5.71346500 | -0.32623300 | -1.11033700 |
| H | -3.92571400 | 0.94304600  | -0.36630400 |
| H | -4.59055700 | -4.19904100 | 0.33113800  |
| H | -1.85261300 | -0.20119600 | 0.65841500  |
| H | -0.93539200 | -2.14354200 | -0.32353900 |
| H | 1.56253500  | 0.36203900  | -2.37995500 |
| H | 1.22399800  | -0.55149000 | 2.26873100  |
| C | 2.98524500  | -0.59572300 | 3.48369400  |
| H | 2.42451500  | -0.44212900 | 4.41152300  |
| H | 3.83456800  | -1.24342600 | 3.72125400  |
| H | 3.39113100  | 0.36916300  | 3.16210000  |
| C | 1.52788400  | -2.58243900 | 2.87847300  |
| H | 2.33871800  | -3.29710200 | 3.05140100  |
| H | 0.97618100  | -2.47050200 | 3.81784200  |
| H | 0.85530100  | -3.02032000 | 2.13459600  |
| C | -1.98387400 | -4.25332400 | 0.65124000  |
| H | -1.75900000 | -4.76425200 | -0.29241400 |
| H | -1.03146800 | -4.02664100 | 1.14204400  |
| H | -2.52791500 | -4.95805200 | 1.28694700  |
| H | -2.99237800 | -2.50412400 | 1.37998700  |

Atom

x

y

z

**7A, -1655.8228367**

|   |             |             |             |
|---|-------------|-------------|-------------|
| O | 1.05415300  | -0.16674500 | -0.09098500 |
| C | -1.29065300 | 3.12899500  | -0.25610100 |
| C | 0.09748100  | 3.13516200  | -0.61010900 |
| C | 0.86671400  | 2.84466300  | 0.56707100  |
| C | -0.05125200 | 2.60567300  | 1.63178800  |
| C | -1.38531600 | 2.77101500  | 1.12294900  |
| C | -2.41681900 | 3.58358700  | -1.13654300 |
| C | 0.65531600  | 3.49811600  | -1.95840600 |
| C | 2.36612000  | 2.85353300  | 0.66342700  |
| C | 0.30055200  | 2.30672300  | 3.06362400  |
| C | -2.63945700 | 2.75178600  | 1.95487900  |
| C | 2.25864400  | -0.82519600 | -0.13237100 |

|    |             |             |             |
|----|-------------|-------------|-------------|
| C  | 2.90462500  | -0.95715800 | -1.38294200 |
| C  | 4.11536000  | -1.65560400 | -1.40553700 |
| C  | 4.66133200  | -2.19815700 | -0.24360800 |
| C  | 4.00269900  | -2.04578000 | 0.97352000  |
| C  | 2.79019800  | -1.35327900 | 1.06402000  |
| C  | 2.29368700  | -0.40415200 | -2.66435100 |
| C  | 2.08075500  | -1.22297500 | 2.40557700  |
| H  | -2.54493100 | 4.66886100  | -1.04129600 |
| H  | -3.36942000 | 3.12301200  | -0.86494400 |
| H  | -2.22579200 | 3.37360500  | -2.19169700 |
| H  | 0.78132900  | 4.58547000  | -2.03124200 |
| H  | -0.00740800 | 3.19259700  | -2.77204800 |
| H  | 1.63553700  | 3.04786200  | -2.13211400 |
| H  | 2.73007200  | 2.20417100  | 1.46227100  |
| H  | 2.72125700  | 3.86897000  | 0.87616400  |
| H  | 2.83988300  | 2.52987400  | -0.26630500 |
| H  | 0.28221800  | 3.23220400  | 3.65228800  |
| H  | 1.29993900  | 1.87916500  | 3.16144900  |
| H  | -0.41008400 | 1.61953500  | 3.53277700  |
| H  | -3.52487500 | 2.51425700  | 1.36243200  |
| H  | -2.80298800 | 3.73919300  | 2.40359400  |
| H  | -2.58070100 | 2.03319100  | 2.77676200  |
| Ti | -0.33569800 | 0.93558600  | 0.02640200  |
| C  | 3.32478100  | 0.27831200  | -3.58080900 |
| H  | 3.89324600  | 1.04710100  | -3.04775500 |
| H  | 4.04090300  | -0.43737400 | -3.99586000 |
| H  | 2.81860500  | 0.75223100  | -4.42786000 |
| C  | 1.53065900  | -1.50978400 | -3.42374700 |
| H  | 0.76267900  | -1.97241100 | -2.79532800 |
| H  | 1.04684600  | -1.10323000 | -4.31849900 |
| H  | 2.21487900  | -2.30252500 | -3.74346400 |
| H  | 4.63961200  | -1.78031400 | -2.34716900 |
| H  | 5.60120300  | -2.73936800 | -0.28785100 |
| H  | 4.43710400  | -2.47395700 | 1.87153000  |
| C  | -2.00961200 | -2.00759900 | -0.49364200 |
| C  | -1.64437200 | 0.33109100  | -1.45508200 |
| H  | -2.29955100 | 1.03754400  | -1.95931400 |
| H  | -1.07567700 | -0.26763600 | -2.17199700 |
| H  | -2.17871600 | -2.28480900 | -1.54131500 |
| C  | -5.23450500 | -2.25921200 | -0.30821200 |
| C  | -4.81569600 | -0.94064300 | -0.97830100 |
| C  | -3.80963600 | -0.12237200 | -0.14513300 |
| C  | -4.16616100 | -3.35841400 | -0.23066200 |
| C  | -2.32216600 | -0.49369000 | -0.36792100 |

|   |             |             |             |
|---|-------------|-------------|-------------|
| C | -2.80979000 | -2.97970100 | 0.40373600  |
| H | -5.59090800 | -2.02767100 | 0.70539300  |
| H | -4.42413800 | -1.12140100 | -1.98789900 |
| H | -4.06516100 | -0.24422900 | 0.91395200  |
| H | -3.96696500 | -3.74448300 | -1.24082600 |
| H | -6.10077100 | -2.66527900 | -0.84336600 |
| H | -5.71346500 | -0.32623200 | -1.11033700 |
| H | -3.92571400 | 0.94304700  | -0.36630400 |
| H | -4.59055700 | -4.19904000 | 0.33113800  |
| H | -1.85261300 | -0.20119600 | 0.65841500  |
| H | -0.93539200 | -2.14354200 | -0.32353900 |
| H | 1.56253500  | 0.36203900  | -2.37995500 |
| H | 1.22399800  | -0.55149000 | 2.26873100  |
| C | 2.98524500  | -0.59572300 | 3.48369400  |
| H | 2.42451500  | -0.44212900 | 4.41152300  |
| H | 3.83456800  | -1.24342600 | 3.72125400  |
| H | 3.39113100  | 0.36916300  | 3.16210000  |
| C | 1.52788400  | -2.58243900 | 2.87847300  |
| H | 2.33871800  | -3.29710200 | 3.05140100  |
| H | 0.97618100  | -2.47050200 | 3.81784200  |
| H | 0.85530100  | -3.02032000 | 2.13459600  |
| C | -1.98387400 | -4.25332400 | 0.65124000  |
| H | -1.75900100 | -4.76425200 | -0.29241400 |
| H | -1.03146800 | -4.02664100 | 1.14204400  |
| H | -2.52791600 | -4.95805200 | 1.28694700  |
| H | -2.99237800 | -2.50412400 | 1.37998700  |

**Table S2** Optimized Cartesian coordinates (Å) and zero-point energy corrected energy (a.u.) of **1C<sub>12si</sub>**, **1TS<sub>12si</sub>**, **1P<sub>12si</sub>**, **1C<sub>12re</sub>**, **1TS<sub>12re</sub>**, **1P<sub>12re</sub>**, **1C<sub>21re</sub>**, **1TS<sub>21re</sub>**, **1P<sub>21re</sub>**, **1C<sub>21si</sub>**, **1TS<sub>21si</sub>** and **1P<sub>21si</sub>**, as well as the imaginary frequency (cm<sup>-1</sup>) of **1TS<sub>12si</sub>**, **1TS<sub>12re</sub>**, **1TS<sub>21re</sub>** and **1TS<sub>21si</sub>**.

| Atom                                   | x           | y           | z           |
|----------------------------------------|-------------|-------------|-------------|
| <b>1C<sub>12si</sub>, -1342.882024</b> |             |             |             |
| Ti                                     | -1.50803700 | -0.69832300 | -0.26346000 |
| O                                      | -0.14243700 | 0.40302900  | 0.04820900  |
| C                                      | -3.38337800 | 0.50744100  | -1.06316700 |
| C                                      | -3.82005800 | -0.85502800 | -1.04040200 |
| C                                      | -3.79242200 | -1.29698300 | 0.31343000  |
| C                                      | -3.34503500 | -0.20563900 | 1.13113100  |
| C                                      | -3.10939400 | 0.91543000  | 0.28142500  |
| C                                      | 0.72063800  | 1.44663500  | 0.29126200  |
| C                                      | 1.16654000  | 2.22158000  | -0.80604800 |
| C                                      | 2.05009200  | 2.74846200  | 1.81423500  |
| C                                      | 1.14961700  | 1.69604300  | 1.61573400  |

|   |             |             |             |
|---|-------------|-------------|-------------|
| C | -3.35751600 | 1.40578000  | -2.26565700 |
| C | -4.35087700 | -1.62867500 | -2.21084100 |
| C | -4.32692900 | -2.60989400 | 0.81603400  |
| C | -3.26444900 | -0.21377600 | 2.63297800  |
| C | 0.72068400  | 1.95134500  | -2.23784700 |
| C | 1.85199900  | 1.29804600  | -3.05795200 |
| C | 0.20387500  | 3.22157200  | -2.94064900 |
| C | 0.69699300  | 0.86480900  | 2.81030500  |
| C | -0.02294000 | 1.72252700  | 3.87031800  |
| C | 1.88007400  | 0.11367600  | 3.45464400  |
| C | 2.06758400  | 3.25765900  | -0.53940400 |
| C | 2.50921900  | 3.52417300  | 0.75378900  |
| C | -2.75111900 | 2.30931900  | 0.71058000  |
| H | -0.10774300 | 1.23902600  | -2.20148600 |
| H | -0.01561600 | 0.11477200  | 2.44835400  |
| C | -1.13288300 | -1.37455600 | -2.19877500 |
| H | -1.62544400 | -2.34061800 | -2.36461800 |
| H | -1.44058100 | -0.69490500 | -2.99800100 |
| H | -0.04486100 | -1.50207200 | -2.25684400 |
| H | -5.40793800 | -2.52914800 | 0.98245900  |
| H | -4.17790700 | -3.42325500 | 0.09989100  |
| H | -3.88130100 | -2.90611600 | 1.76902900  |
| H | -4.23414300 | 0.06767500  | 3.06181400  |
| H | -3.01779700 | -1.20249800 | 3.03002600  |
| H | -2.52661400 | 0.49639700  | 3.01121900  |
| H | -2.27486600 | 2.32558400  | 1.69200400  |
| H | -2.07350000 | 2.79801500  | 0.00636000  |
| H | -3.65739100 | 2.92350400  | 0.77506400  |
| H | -4.30604000 | 1.95240100  | -2.33880900 |
| H | -2.56057100 | 2.15074100  | -2.20772700 |
| H | -3.23402100 | 0.84644200  | -3.19525900 |
| H | -5.42446700 | -1.43764800 | -2.32898600 |
| H | -3.86596900 | -1.34386300 | -3.14699800 |
| H | -4.22644900 | -2.70697700 | -2.08253000 |
| H | 2.43062300  | 3.86629500  | -1.36144600 |
| H | 3.20905900  | 4.33399000  | 0.93438700  |
| H | 2.39980000  | 2.96198600  | 2.81964300  |
| H | -0.86640200 | 2.27579500  | 3.44610600  |
| H | -0.39780700 | 1.09356700  | 4.68476100  |
| H | 0.65596700  | 2.45810300  | 4.31244400  |
| H | 1.53014800  | -0.54542900 | 4.25642700  |
| H | 2.42345800  | -0.49024300 | 2.72204600  |
| H | 2.59776600  | 0.81310000  | 3.89456500  |
| H | 2.71608300  | 1.96600200  | -3.13641000 |

|                                                   |             |             |             |
|---------------------------------------------------|-------------|-------------|-------------|
| H                                                 | 2.19455500  | 0.36528800  | -2.59906800 |
| H                                                 | 1.51074100  | 1.07226700  | -4.07373100 |
| H                                                 | -0.58764300 | 3.71138900  | -2.36371500 |
| H                                                 | 1.00043000  | 3.95622800  | -3.09284300 |
| H                                                 | -0.19707900 | 2.97091200  | -3.92811800 |
| C                                                 | 0.21207500  | -3.10910000 | 0.23058700  |
| H                                                 | 0.13948800  | -3.63881500 | -0.72066200 |
| C                                                 | -0.94667500 | -2.81510000 | 0.87368600  |
| H                                                 | -0.93194200 | -2.38699500 | 1.87740400  |
| H                                                 | -1.87534600 | -3.26627300 | 0.53688500  |
| C                                                 | 1.59564300  | -2.83855000 | 0.71136900  |
| H                                                 | 1.57495000  | -2.24494800 | 1.63039800  |
| H                                                 | 2.00729500  | -3.82468800 | 0.98367400  |
| C                                                 | 2.52647100  | -2.20507400 | -0.34360000 |
| H                                                 | 2.47001700  | -2.78749900 | -1.27321400 |
| H                                                 | 2.16521200  | -1.19676600 | -0.57895500 |
| C                                                 | 3.98500000  | -2.13630100 | 0.12717500  |
| H                                                 | 4.04106100  | -1.56954500 | 1.06656600  |
| H                                                 | 4.34647300  | -3.14707300 | 0.35569100  |
| C                                                 | 4.91837300  | -1.48893800 | -0.91304900 |
| H                                                 | 4.88564600  | -2.06466000 | -1.84657300 |
| H                                                 | 4.53713200  | -0.48370400 | -1.14795600 |
| C                                                 | 6.34099900  | -1.38609200 | -0.43168200 |
| H                                                 | 6.49843900  | -0.77871700 | 0.46084400  |
| C                                                 | 7.38652700  | -1.98094200 | -1.00551300 |
| H                                                 | 7.27679700  | -2.59416900 | -1.89715900 |
| H                                                 | 8.39224600  | -1.87307300 | -0.61109300 |
| <b>1TS<sub>12si</sub>, -1342.8678659, i303.99</b> |             |             |             |
| Ti                                                | 0.84863000  | -1.05686100 | 0.06062500  |
| O                                                 | 0.59470000  | 0.70578500  | -0.00109400 |
| C                                                 | 2.76605400  | -1.48977400 | 1.31103000  |
| C                                                 | 2.20520500  | -2.78976500 | 1.05231500  |
| C                                                 | 2.26686600  | -3.02232400 | -0.34625700 |
| C                                                 | 2.84319000  | -1.86455700 | -0.96662900 |
| C                                                 | 3.18193100  | -0.93109200 | 0.06608300  |
| C                                                 | 0.69842800  | 2.07608500  | 0.04173700  |
| C                                                 | 0.51433500  | 2.73051300  | 1.28096400  |
| C                                                 | 1.05247600  | 4.16671400  | -1.08305700 |
| C                                                 | 0.97265600  | 2.77204200  | -1.15654700 |
| C                                                 | 3.00886600  | -0.88943700 | 2.66922100  |
| C                                                 | 1.77335800  | -3.78284700 | 2.09388500  |
| C                                                 | 1.89182300  | -4.30425800 | -1.03314500 |
| C                                                 | 3.18022000  | -1.72133200 | -2.42423600 |
| C                                                 | 0.16617000  | 1.95788400  | 2.54701900  |

|   |             |             |             |
|---|-------------|-------------|-------------|
| C | -1.36525200 | 1.84301900  | 2.70489900  |
| C | 0.79888100  | 2.54502700  | 3.82030500  |
| C | 1.12554300  | 2.04813600  | -2.48828600 |
| C | 2.25140700  | 2.62012300  | -3.36824100 |
| C | -0.21331100 | 2.03952800  | -3.25629100 |
| C | 0.60743700  | 4.12588900  | 1.28825200  |
| C | 0.87302000  | 4.84054800  | 0.12226500  |
| C | 3.91522200  | 0.36852800  | -0.11007000 |
| H | 0.56406700  | 0.94252600  | 2.43376600  |
| H | 1.38754600  | 1.00669900  | -2.26876200 |
| C | -0.79194400 | -1.77413400 | 1.23029300  |
| H | -0.93599200 | -2.80596800 | 1.54846300  |
| H | 0.04090900  | -1.36967700 | 1.87678500  |
| H | -1.65763400 | -1.16886400 | 1.48471400  |
| H | 2.68842100  | -5.04602300 | -0.89949500 |
| H | 0.97564100  | -4.74337700 | -0.62684400 |
| H | 1.75982400  | -4.17461600 | -2.10973800 |
| H | 4.17409500  | -2.13953300 | -2.62477600 |
| H | 2.47252500  | -2.25026700 | -3.06746800 |
| H | 3.20047600  | -0.67513400 | -2.73827100 |
| H | 3.81175100  | 0.76218700  | -1.12323100 |
| H | 3.56249200  | 1.13798800  | 0.58111300  |
| H | 4.98600500  | 0.22246000  | 0.07617500  |
| H | 3.98532900  | -1.21174500 | 3.05140700  |
| H | 3.01755800  | 0.20259400  | 2.63882600  |
| H | 2.26010400  | -1.20188200 | 3.40244000  |
| H | 2.63662700  | -4.36359400 | 2.44040200  |
| H | 1.33917400  | -3.30180900 | 2.97484700  |
| H | 1.04257900  | -4.49643000 | 1.70390300  |
| H | 0.46963600  | 4.66353300  | 2.22013400  |
| H | 0.94009400  | 5.92348500  | 0.15359800  |
| H | 1.25801500  | 4.73517400  | -1.98389400 |
| H | 3.20331400  | 2.66674100  | -2.82986400 |
| H | 2.38963700  | 1.99358700  | -4.25536300 |
| H | 2.02106300  | 3.62900000  | -3.72370800 |
| H | -0.12385600 | 1.47426700  | -4.19065700 |
| H | -1.01771100 | 1.59714100  | -2.65941500 |
| H | -0.51866200 | 3.05963600  | -3.51091400 |
| H | -1.81259800 | 2.83285800  | 2.84164400  |
| H | -1.82859000 | 1.39378300  | 1.82024800  |
| H | -1.62340400 | 1.23471800  | 3.57885000  |
| H | 1.88044700  | 2.67370900  | 3.71330600  |
| H | 0.36971300  | 3.51781300  | 4.07863500  |
| H | 0.61660200  | 1.88001100  | 4.67039500  |



|                                         |             |             |             |
|-----------------------------------------|-------------|-------------|-------------|
| C                                       | -1.34948800 | -1.92691700 | -0.85551000 |
| H                                       | -1.59184700 | -2.96464100 | -0.63826200 |
| C                                       | -0.22349600 | -1.71655200 | -1.70241900 |
| H                                       | -0.24610400 | -0.83533500 | -2.34308000 |
| H                                       | 0.23423400  | -2.59438200 | -2.14327200 |
| C                                       | -2.53778200 | -0.97760900 | -0.91039000 |
| H                                       | -2.23102100 | 0.03104700  | -0.61019300 |
| H                                       | -2.78532900 | -0.90171200 | -1.97888000 |
| C                                       | -3.80116100 | -1.42237600 | -0.16082400 |
| H                                       | -4.06072900 | -2.44354600 | -0.47218800 |
| H                                       | -3.62159600 | -1.47008500 | 0.92050900  |
| C                                       | -4.99111800 | -0.49048300 | -0.42894800 |
| H                                       | -4.72869100 | 0.53212700  | -0.12364100 |
| H                                       | -5.18961500 | -0.44669400 | -1.50750500 |
| C                                       | -6.27541300 | -0.92692800 | 0.30066300  |
| H                                       | -6.55742900 | -1.93714400 | -0.02136400 |
| H                                       | -6.06358200 | -0.98824300 | 1.37882200  |
| C                                       | -7.42428600 | 0.01745800  | 0.06776800  |
| H                                       | -7.27641800 | 1.04149500  | 0.41394000  |
| C                                       | -8.57215900 | -0.30786200 | -0.52622500 |
| H                                       | -8.76395800 | -1.31667600 | -0.88487000 |
| H                                       | -9.36663300 | 0.41798600  | -0.67003000 |
| <b>1P<sub>12si</sub>, -1342.8907234</b> |             |             |             |
| Ti                                      | -0.33129500 | 0.90617200  | -0.00248200 |
| O                                       | -1.34535200 | -0.55418700 | -0.02925300 |
| C                                       | -1.31730000 | 2.70545600  | 1.12232100  |
| C                                       | -0.04690000 | 3.18866000  | 0.65701900  |
| C                                       | -0.06673300 | 3.18511200  | -0.76862600 |
| C                                       | -1.33127900 | 2.66265900  | -1.18716700 |
| C                                       | -2.11622100 | 2.39111800  | -0.01583300 |
| C                                       | -2.34199800 | -1.49675100 | 0.02638100  |
| C                                       | -2.81491700 | -1.91130400 | 1.29122700  |
| C                                       | -3.83348000 | -3.00007100 | -1.10035800 |
| C                                       | -2.83337900 | -2.02629100 | -1.18768600 |
| C                                       | -1.75339900 | 2.63359000  | 2.56025400  |
| C                                       | 1.05128500  | 3.75045700  | 1.51903500  |
| C                                       | 0.99087300  | 3.75948500  | -1.66313200 |
| C                                       | -1.79751000 | 2.53028700  | -2.60903700 |
| C                                       | -2.22454600 | -1.37333500 | 2.58853800  |
| C                                       | -1.18671700 | -2.35999700 | 3.16419300  |
| C                                       | -3.29252200 | -1.02726600 | 3.64150300  |
| C                                       | -2.26514300 | -1.60122500 | -2.53585400 |
| C                                       | -3.34661800 | -1.39531100 | -3.61129800 |
| C                                       | -1.19985600 | -2.61015700 | -3.01479600 |

|   |             |             |             |
|---|-------------|-------------|-------------|
| C | -3.81187300 | -2.89208800 | 1.31123200  |
| C | -4.32065200 | -3.43102500 | 0.13168200  |
| C | -3.54571800 | 1.92926600  | 0.00064900  |
| H | -1.69547900 | -0.44149000 | 2.35248400  |
| H | -1.76105200 | -0.63897300 | -2.39528300 |
| C | 1.65341100  | 0.10430800  | 1.19366000  |
| H | 0.94836200  | 0.82199800  | 1.68520700  |
| H | 1.22248500  | -0.90238700 | 1.21550900  |
| H | 2.47139700  | 0.12254100  | 1.91671200  |
| H | 0.87373700  | 4.84832100  | -1.72416400 |
| H | 2.00168500  | 3.56675600  | -1.29273600 |
| H | 0.92157600  | 3.37092500  | -2.68120700 |
| H | -2.22283400 | 3.48085400  | -2.95399300 |
| H | -0.97917400 | 2.27320100  | -3.28610700 |
| H | -2.57497100 | 1.77069000  | -2.71546000 |
| H | -3.78169200 | 1.29470400  | -0.85638300 |
| H | -3.78396000 | 1.36282800  | 0.90352000  |
| H | -4.21919000 | 2.79391600  | -0.03414800 |
| H | -2.14479300 | 3.60698000  | 2.88053600  |
| H | -2.54710700 | 1.89957300  | 2.71326100  |
| H | -0.92885300 | 2.38552100  | 3.23510900  |
| H | 0.90967800  | 4.83023100  | 1.64843100  |
| H | 1.06192600  | 3.30933200  | 2.51929300  |
| H | 2.04011300  | 3.60935000  | 1.07455000  |
| H | -4.19490500 | -3.24243500 | 2.26415300  |
| H | -5.09559400 | -4.18998900 | 0.17278200  |
| H | -4.23531200 | -3.43185000 | -2.01098800 |
| H | -4.12541500 | -0.70274300 | -3.27566700 |
| H | -2.89707500 | -0.98848400 | -4.52275500 |
| H | -3.83475000 | -2.33494000 | -3.88749800 |
| H | -0.75195200 | -2.28166600 | -3.95878800 |
| H | -0.39956700 | -2.72894400 | -2.27687700 |
| H | -1.64499400 | -3.59693900 | -3.17929900 |
| H | -1.66215000 | -3.30908600 | 3.43150700  |
| H | -0.39821400 | -2.58405700 | 2.43778700  |
| H | -0.72020500 | -1.95278200 | 4.06785800  |
| H | -4.05009500 | -0.34565500 | 3.24130900  |
| H | -3.81063200 | -1.92001400 | 4.00420200  |
| H | -2.82715300 | -0.55149200 | 4.51082100  |
| C | 2.20565900  | 0.49727400  | -0.21908600 |
| H | 2.62496900  | 1.50561800  | -0.12585900 |
| C | 1.14406700  | 0.51279100  | -1.35786400 |
| H | 0.95187600  | -0.50048500 | -1.72994500 |
| H | 1.44742700  | 1.15762700  | -2.17976200 |

|                                         |             |             |             |
|-----------------------------------------|-------------|-------------|-------------|
| C                                       | 3.36089900  | -0.47303000 | -0.59655300 |
| H                                       | 2.96825400  | -1.49858300 | -0.60893000 |
| H                                       | 3.64747900  | -0.24225100 | -1.62864700 |
| C                                       | 4.60861200  | -0.39320500 | 0.29509300  |
| H                                       | 4.94540200  | 0.65115200  | 0.35958200  |
| H                                       | 4.37601500  | -0.70923600 | 1.32070800  |
| C                                       | 5.75777900  | -1.26343600 | -0.23575900 |
| H                                       | 5.41962800  | -2.30590600 | -0.31177900 |
| H                                       | 6.01666700  | -0.94942600 | -1.25483700 |
| C                                       | 7.01908100  | -1.19885500 | 0.64649900  |
| H                                       | 7.37375900  | -0.16227000 | 0.70804600  |
| H                                       | 6.74778900  | -1.49980000 | 1.66967000  |
| C                                       | 8.12702900  | -2.08351300 | 0.14122300  |
| H                                       | 7.90247300  | -3.15032700 | 0.09961300  |
| C                                       | 9.32557600  | -1.65641700 | -0.25566700 |
| H                                       | 9.59401600  | -0.60261400 | -0.22947600 |
| H                                       | 10.08665200 | -2.34268600 | -0.61419500 |
| <b>1C<sub>12res</sub> -1342.8829827</b> |             |             |             |
| Ti                                      | 1.11994400  | -0.94779700 | 0.01486600  |
| O                                       | 0.28923400  | 0.62919700  | 0.02693100  |
| C                                       | 2.82386000  | -0.95883600 | 1.64852200  |
| C                                       | 2.84287700  | -2.28099200 | 1.10059900  |
| C                                       | 3.18820400  | -2.17543200 | -0.27789100 |
| C                                       | 3.40583300  | -0.78795800 | -0.57703500 |
| C                                       | 3.19202600  | -0.03798000 | 0.61616700  |
| C                                       | -0.10924300 | 1.94120300  | 0.11698900  |
| C                                       | -0.68670600 | 2.38818300  | 1.32852300  |
| C                                       | -0.38952100 | 4.11021600  | -0.88024700 |
| C                                       | 0.05007900  | 2.78801600  | -1.00400800 |
| C                                       | 2.59936300  | -0.60722000 | 3.09090700  |
| C                                       | 2.68149800  | -3.55548000 | 1.87467900  |
| C                                       | 3.45664900  | -3.33207300 | -1.20081000 |
| C                                       | 3.89574000  | -0.23346800 | -1.88662500 |
| C                                       | -0.88935100 | 1.46749400  | 2.52527900  |
| C                                       | -2.37398400 | 1.07409000  | 2.66981700  |
| C                                       | -0.35698500 | 2.07709500  | 3.83604000  |
| C                                       | 0.62946900  | 2.30646800  | -2.32846600 |
| C                                       | 1.82691900  | 3.15928400  | -2.79084200 |
| C                                       | -0.45585100 | 2.26674900  | -3.42485300 |
| C                                       | -1.10327600 | 3.72196200  | 1.38836200  |
| C                                       | -0.95914300 | 4.57912000  | 0.30041200  |
| C                                       | 3.40953500  | 1.43719400  | 0.79647600  |
| H                                       | -0.32603100 | 0.54881600  | 2.33944600  |
| H                                       | 0.99448200  | 1.28289800  | -2.18349100 |

|   |             |             |             |
|---|-------------|-------------|-------------|
| C | -0.09799900 | -2.12039800 | 1.22850100  |
| H | 0.05251000  | -3.18712000 | 1.02679000  |
| H | 0.02569900  | -1.95479000 | 2.30239000  |
| H | -1.12080700 | -1.83535800 | 0.95402400  |
| H | 4.49694100  | -3.66154300 | -1.09175800 |
| H | 2.82390800  | -4.19533500 | -0.97729400 |
| H | 3.31567800  | -3.07169900 | -2.25278800 |
| H | 4.99015800  | -0.15974000 | -1.87433800 |
| H | 3.63403600  | -0.87278200 | -2.73423100 |
| H | 3.50932300  | 0.76913400  | -2.08489400 |
| H | 3.32535000  | 1.98075700  | -0.14634600 |
| H | 2.69528600  | 1.87742400  | 1.49631700  |
| H | 4.41528400  | 1.62132100  | 1.19308400  |
| H | 3.55851100  | -0.59768400 | 3.62358900  |
| H | 2.15522700  | 0.38366300  | 3.20970400  |
| H | 1.95604400  | -1.33094300 | 3.59603200  |
| H | 3.64987100  | -3.86548500 | 2.28600100  |
| H | 1.99297600  | -3.44358000 | 2.71489200  |
| H | 2.31848200  | -4.37495400 | 1.24924500  |
| H | -1.55237400 | 4.09494900  | 2.30331400  |
| H | -1.29236800 | 5.60967900  | 0.37167800  |
| H | -0.28686200 | 4.78395800  | -1.72532100 |
| H | 2.61074100  | 3.20691500  | -2.02838700 |
| H | 2.26195700  | 2.74515400  | -3.70661000 |
| H | 1.52493500  | 4.18753000  | -3.01133000 |
| H | -0.05704000 | 1.84518000  | -4.35402300 |
| H | -1.32311900 | 1.67336200  | -3.11600400 |
| H | -0.82157100 | 3.27348100  | -3.64969400 |
| H | -2.99557300 | 1.95372300  | 2.86664900  |
| H | -2.75223400 | 0.59878300  | 1.75910400  |
| H | -2.50865400 | 0.37490900  | 3.50178500  |
| H | 0.69100900  | 2.38158900  | 3.74572400  |
| H | -0.92992300 | 2.95907600  | 4.13824500  |
| H | -0.43265300 | 1.34870300  | 4.64984500  |
| C | -0.71310600 | -1.49604100 | -2.23095600 |
| C | 0.52840300  | -2.03011300 | -2.10011500 |
| H | 1.37398500  | -1.54750200 | -2.58847100 |
| H | 0.66434500  | -3.05920200 | -1.77247900 |
| H | -0.79555100 | -0.50492400 | -2.67758300 |
| C | -2.00205800 | -2.16274800 | -1.88187900 |
| H | -2.38467300 | -2.57453500 | -2.83093000 |
| H | -1.82519500 | -3.02489700 | -1.22892400 |
| C | -3.07365900 | -1.22209500 | -1.29931500 |
| H | -2.69961700 | -0.76665400 | -0.37367900 |

|                                                   |             |             |             |
|---------------------------------------------------|-------------|-------------|-------------|
| H                                                 | -3.24425100 | -0.39442100 | -2.00082200 |
| C                                                 | -4.39787300 | -1.94435500 | -1.02240400 |
| H                                                 | -4.22843700 | -2.77356300 | -0.32337900 |
| H                                                 | -4.76557600 | -2.39748100 | -1.95320800 |
| C                                                 | -5.48003100 | -1.01300500 | -0.44445200 |
| H                                                 | -5.12583900 | -0.57513200 | 0.49758200  |
| H                                                 | -5.63250200 | -0.17656900 | -1.14271600 |
| C                                                 | -6.78923400 | -1.71873400 | -0.21257800 |
| H                                                 | -7.26680400 | -2.13819800 | -1.09911300 |
| C                                                 | -7.37856300 | -1.86536600 | 0.97377500  |
| H                                                 | -8.32452400 | -2.38714900 | 1.08098500  |
| H                                                 | -6.94043600 | -1.46048300 | 1.88346000  |
| <b>1TS<sub>12re</sub>, -1342.8669007, i306.44</b> |             |             |             |
| Ti                                                | -0.14555000 | 0.73506400  | 0.16114900  |
| O                                                 | -1.39823500 | -0.50091300 | -0.12462100 |
| C                                                 | -0.91802800 | 2.14706500  | 1.83876600  |
| C                                                 | 0.45259700  | 2.54032600  | 1.64192100  |
| C                                                 | 0.57004500  | 3.07906600  | 0.33433900  |
| C                                                 | -0.71691800 | 3.00474900  | -0.29609300 |
| C                                                 | -1.64316000 | 2.46040000  | 0.65102900  |
| C                                                 | -2.54119200 | -1.26284900 | -0.18765900 |
| C                                                 | -2.86520400 | -2.09017700 | 0.91125300  |
| C                                                 | -4.48599800 | -1.98944800 | -1.39213100 |
| C                                                 | -3.33525800 | -1.19523700 | -1.35406400 |
| C                                                 | -1.51243300 | 1.64287800  | 3.12554500  |
| C                                                 | 1.52679400  | 2.51736900  | 2.69224600  |
| C                                                 | 1.79837800  | 3.72233900  | -0.24170200 |
| C                                                 | -1.06946500 | 3.55967000  | -1.64756300 |
| C                                                 | -1.95017700 | -2.19124200 | 2.12480300  |
| C                                                 | -0.88222100 | -3.28388500 | 1.90156700  |
| C                                                 | -2.69829400 | -2.42675500 | 3.44745500  |
| C                                                 | -2.92802700 | -0.33895600 | -2.54616700 |
| C                                                 | -4.11800400 | 0.30223000  | -3.28037000 |
| C                                                 | -2.06339900 | -1.16086500 | -3.52650200 |
| C                                                 | -4.02807900 | -2.86068000 | 0.81168200  |
| C                                                 | -4.83320200 | -2.81319100 | -0.32417100 |
| C                                                 | -3.12705500 | 2.31411500  | 0.46415700  |
| H                                                 | -1.42827100 | -1.23163600 | 2.22233200  |
| H                                                 | -2.30850300 | 0.48123200  | -2.16412600 |
| C                                                 | 1.49002700  | -0.37917700 | 0.97240500  |
| H                                                 | 2.36240200  | 0.14821500  | 1.35429700  |
| H                                                 | 0.67202500  | -0.25560700 | 1.73811700  |
| H                                                 | 1.66926800  | -1.45174200 | 0.94483800  |
| H                                                 | 1.85030000  | 4.77206500  | 0.07235800  |

|   |             |             |             |
|---|-------------|-------------|-------------|
| H | 2.71943700  | 3.24153000  | 0.09913800  |
| H | 1.79673300  | 3.72023900  | -1.33416300 |
| H | -1.36016300 | 4.61339500  | -1.55773300 |
| H | -0.22962600 | 3.51588200  | -2.34519600 |
| H | -1.91080300 | 3.03060200  | -2.10193300 |
| H | -3.40240300 | 2.26085000  | -0.59107600 |
| H | -3.51911200 | 1.42010500  | 0.95507600  |
| H | -3.64498300 | 3.18026800  | 0.89339300  |
| H | -1.82050300 | 2.48941300  | 3.75159700  |
| H | -2.39853600 | 1.02745100  | 2.95401900  |
| H | -0.80000500 | 1.05517300  | 3.71095100  |
| H | 1.47261000  | 3.42445700  | 3.30595800  |
| H | 1.42649600  | 1.66605000  | 3.37153500  |
| H | 2.52878200  | 2.48463800  | 2.25644900  |
| H | -4.30916800 | -3.50895000 | 1.63437700  |
| H | -5.73156900 | -3.42010400 | -0.37737800 |
| H | -5.12096100 | -1.96396800 | -2.27107300 |
| H | -4.76801900 | 0.85404500  | -2.59414200 |
| H | -3.75629500 | 0.99871000  | -4.04362000 |
| H | -4.73152800 | -0.44308600 | -3.79561100 |
| H | -1.71336300 | -0.53773200 | -4.35705600 |
| H | -1.19145900 | -1.59783800 | -3.02795900 |
| H | -2.64313900 | -1.98731400 | -3.95008500 |
| H | -1.35328600 | -4.26858300 | 1.81849300  |
| H | -0.31761800 | -3.11221000 | 0.97928600  |
| H | -0.17760300 | -3.31867500 | 2.73988600  |
| H | -3.48948400 | -1.68687700 | 3.60333600  |
| H | -3.15497300 | -3.42034800 | 3.48796600  |
| H | -2.00074900 | -2.36244400 | 4.28851000  |
| C | 1.76605900  | -0.24113700 | -1.18387500 |
| C | 0.88209800  | 0.72498700  | -1.74100900 |
| H | 0.08387800  | 0.34936400  | -2.38003100 |
| H | 1.31265600  | 1.67225600  | -2.04952100 |
| H | 1.46059200  | -1.27985800 | -1.29045600 |
| C | 3.26631400  | -0.00885400 | -1.18641200 |
| H | 3.51278600  | 0.11920300  | -2.25120500 |
| H | 3.50043700  | 0.95414800  | -0.71757800 |
| C | 4.15167900  | -1.13066800 | -0.62595500 |
| H | 4.00980900  | -1.23347400 | 0.45574900  |
| H | 3.84465800  | -2.08716000 | -1.07154200 |
| C | 5.64034200  | -0.89098200 | -0.91330600 |
| H | 5.94934500  | 0.07177000  | -0.48514300 |
| H | 5.79382000  | -0.80766100 | -1.99789000 |
| C | 6.54749100  | -2.00262600 | -0.35305300 |

|                                         |             |             |             |
|-----------------------------------------|-------------|-------------|-------------|
| H                                       | 6.41459000  | -2.07519500 | 0.73389400  |
| H                                       | 6.22264600  | -2.96558600 | -0.77459100 |
| C                                       | 8.00197700  | -1.78078200 | -0.67068500 |
| H                                       | 8.25897900  | -1.75561100 | -1.73058100 |
| C                                       | 8.96456400  | -1.61069900 | 0.23531200  |
| H                                       | 9.99917600  | -1.45286600 | -0.05333200 |
| H                                       | 8.75517500  | -1.63256100 | 1.30256900  |
| <b>1P<sub>12re</sub>, -1342.8898743</b> |             |             |             |
| Ti                                      | -0.46982900 | 1.03152800  | -0.00455900 |
| O                                       | -1.20590800 | -0.58585200 | -0.05847500 |
| C                                       | -2.32202200 | 2.29383700  | 0.63195000  |
| C                                       | -1.17782800 | 2.97579800  | 1.15306200  |
| C                                       | -0.39699400 | 3.44753800  | 0.04908300  |
| C                                       | -1.03552700 | 3.03230100  | -1.15570300 |
| C                                       | -2.22273900 | 2.30482500  | -0.79276900 |
| C                                       | -2.03837600 | -1.67222500 | 0.04510200  |
| C                                       | -2.39932100 | -2.12479500 | 1.33409900  |
| C                                       | -3.32105000 | -3.40354000 | -1.00456900 |
| C                                       | -2.47424500 | -2.29879600 | -1.14287500 |
| C                                       | -3.47013800 | 1.73130300  | 1.42223000  |
| C                                       | -0.89906700 | 3.23230200  | 2.60998700  |
| C                                       | 0.83862000  | 4.29839500  | 0.13319900  |
| C                                       | -0.64424900 | 3.42824400  | -2.54926000 |
| C                                       | -1.82305800 | -1.47886400 | 2.58836600  |
| C                                       | -0.46578500 | -2.12231700 | 2.94772800  |
| C                                       | -2.77388300 | -1.50947700 | 3.79597800  |
| C                                       | -1.98740200 | -1.82740800 | -2.50752800 |
| C                                       | -3.02688600 | -2.00007000 | -3.62709000 |
| C                                       | -0.66565600 | -2.53566000 | -2.87613500 |
| C                                       | -3.24419600 | -3.23667600 | 1.40529100  |
| C                                       | -3.70666700 | -3.86718400 | 0.25144600  |
| C                                       | -3.25805800 | 1.77520300  | -1.74508800 |
| H                                       | -1.63771200 | -0.42001100 | 2.35903000  |
| H                                       | -1.77208600 | -0.75596800 | -2.42715600 |
| C                                       | 1.75974700  | 0.74603100  | 1.15186900  |
| H                                       | 1.98682600  | 1.81633200  | 1.19084300  |
| H                                       | 0.78801500  | 0.56604600  | 1.67531500  |
| H                                       | 2.44258700  | 0.23897100  | 1.83682800  |
| H                                       | 0.57729600  | 5.35510700  | -0.00059200 |
| H                                       | 1.33361300  | 4.21537100  | 1.10412000  |
| H                                       | 1.56742600  | 4.04932300  | -0.64338400 |
| H                                       | -1.17368300 | 4.34437100  | -2.83820300 |
| H                                       | 0.42528500  | 3.63308100  | -2.63345600 |
| H                                       | -0.89898500 | 2.65960100  | -3.28291900 |

|   |             |             |             |
|---|-------------|-------------|-------------|
| H | -2.82967200 | 1.52320500  | -2.71788900 |
| H | -3.75751200 | 0.88585000  | -1.35355000 |
| H | -4.02910100 | 2.53633500  | -1.91705400 |
| H | -4.30804600 | 2.43897500  | 1.41628200  |
| H | -3.83586600 | 0.78920300  | 1.00562400  |
| H | -3.20311500 | 1.55656300  | 2.46665700  |
| H | -1.40228400 | 4.15150100  | 2.93307400  |
| H | -1.26666700 | 2.42504200  | 3.24944900  |
| H | 0.16704700  | 3.36311700  | 2.81181800  |
| H | -3.54525600 | -3.61774300 | 2.37493400  |
| H | -4.36542300 | -4.72612600 | 0.33224100  |
| H | -3.68323900 | -3.91121400 | -1.89179700 |
| H | -3.98489300 | -1.53960600 | -3.36646600 |
| H | -2.66418400 | -1.53321600 | -4.54821900 |
| H | -3.21143300 | -3.05425300 | -3.85620400 |
| H | -0.28131800 | -2.16475500 | -3.83260500 |
| H | 0.10151300  | -2.37706200 | -2.11126600 |
| H | -0.81906400 | -3.61551500 | -2.97197000 |
| H | -0.59839300 | -3.17957300 | 3.19782900  |
| H | 0.24030200  | -2.07048500 | 2.11217500  |
| H | -0.01584800 | -1.62681500 | 3.81535400  |
| H | -3.75576700 | -1.09418900 | 3.54985600  |
| H | -2.92308200 | -2.52685600 | 4.17023000  |
| H | -2.35222800 | -0.92629000 | 4.62083300  |
| C | 1.92418400  | 0.16050200  | -0.28803100 |
| C | 1.05528500  | 0.88766600  | -1.35565200 |
| H | 0.84321000  | 0.24010600  | -2.21020900 |
| H | 1.52917100  | 1.80980400  | -1.69811500 |
| H | 1.63439600  | -0.89603700 | -0.24805400 |
| C | 3.42060200  | 0.23006800  | -0.70446200 |
| H | 3.47363200  | -0.06104200 | -1.75960900 |
| H | 3.75265300  | 1.27612400  | -0.65775800 |
| C | 4.37140000  | -0.66287000 | 0.10589900  |
| H | 4.39490600  | -0.35204300 | 1.15885200  |
| H | 3.99877700  | -1.69660400 | 0.09517300  |
| C | 5.80520700  | -0.63347400 | -0.44422200 |
| H | 6.17901500  | 0.39854500  | -0.44673900 |
| H | 5.79832100  | -0.96041200 | -1.49278900 |
| C | 6.77692200  | -1.51780900 | 0.36030700  |
| H | 6.80708700  | -1.17932900 | 1.40379100  |
| H | 6.38532900  | -2.54595900 | 0.37435700  |
| C | 8.16935900  | -1.51923500 | -0.21103900 |
| H | 8.26525100  | -1.89980300 | -1.22897200 |
| C | 9.25805100  | -1.08895300 | 0.42624600  |



|                                         |             |             |             |
|-----------------------------------------|-------------|-------------|-------------|
| H                                       | 10.23890300 | -1.11233100 | -0.03866900 |
| H                                       | 9.21043100  | -0.70408400 | 1.44257800  |
| <b>1C<sub>21re</sub>, -1342.8782786</b> |             |             |             |
| Ti                                      | -0.91525800 | -1.14581500 | -0.45599100 |
| O                                       | -1.25070800 | 0.60489300  | -0.41598700 |
| C                                       | -1.46310800 | -1.45444000 | 1.81110900  |
| C                                       | -2.47159200 | -2.09425500 | 1.02444100  |
| C                                       | -1.87652500 | -3.21258800 | 0.35395200  |
| C                                       | -0.49547100 | -3.24098100 | 0.69866100  |
| C                                       | -0.23909600 | -2.15253800 | 1.60123900  |
| C                                       | -1.67138100 | 1.87608100  | -0.09280400 |
| C                                       | -0.78791200 | 2.74230600  | 0.58900400  |
| C                                       | -3.38159500 | 3.56580400  | -0.13131900 |
| C                                       | -2.97409200 | 2.27449400  | -0.47920100 |
| C                                       | -1.69138200 | -0.32257000 | 2.77077700  |
| C                                       | -3.93087200 | -1.74302900 | 1.02582700  |
| C                                       | -2.60786500 | -4.27437900 | -0.41160600 |
| C                                       | 0.45835200  | -4.33548600 | 0.30168900  |
| C                                       | 0.64990700  | 2.36258000  | 0.91797100  |
| C                                       | 1.03137300  | 2.65882600  | 2.38074100  |
| C                                       | 1.61977500  | 3.07714000  | -0.04711800 |
| C                                       | -3.87590200 | 1.36855900  | -1.30678700 |
| C                                       | -3.63381300 | 1.61099500  | -2.81242800 |
| C                                       | -5.37017900 | 1.50694100  | -0.96915100 |
| C                                       | -1.25459200 | 4.02408300  | 0.90266600  |
| C                                       | -2.53810200 | 4.43443100  | 0.55745300  |
| C                                       | 1.04434700  | -1.87398900 | 2.33451100  |
| H                                       | 0.75699800  | 1.28279600  | 0.76167400  |
| H                                       | -3.59121500 | 0.33498600  | -1.09215300 |
| C                                       | -1.99830700 | -1.73251000 | -2.13972700 |
| H                                       | -1.73276700 | -2.72991000 | -2.50455800 |
| H                                       | -3.08199900 | -1.69864800 | -1.99850900 |
| H                                       | -1.72868800 | -0.98029800 | -2.89303800 |
| H                                       | -2.96578200 | -5.04678500 | 0.28029200  |
| H                                       | -3.48003500 | -3.88038000 | -0.93729900 |
| H                                       | -1.96631400 | -4.76822300 | -1.14565300 |
| H                                       | 0.16181400  | -5.27805600 | 0.77638900  |
| H                                       | 0.46821700  | -4.51645500 | -0.77829300 |
| H                                       | 1.48114900  | -4.12886900 | 0.62281300  |
| H                                       | 0.97390100  | -2.25164400 | 3.36164700  |
| H                                       | 1.90240000  | -2.36508100 | 1.87163800  |
| H                                       | 1.26092400  | -0.80396600 | 2.40326000  |
| H                                       | -2.13809800 | -0.70426500 | 3.69687100  |
| H                                       | -0.75805000 | 0.17476700  | 3.04021300  |

|                                                   |             |             |             |
|---------------------------------------------------|-------------|-------------|-------------|
| H                                                 | -2.36814700 | 0.43456700  | 2.36753300  |
| H                                                 | -4.43951700 | -2.28128700 | 1.83559300  |
| H                                                 | -4.09509400 | -0.67618700 | 1.19273300  |
| H                                                 | -4.42342900 | -2.02278500 | 0.09191400  |
| H                                                 | -0.59761500 | 4.71419500  | 1.42239900  |
| H                                                 | -2.87845000 | 5.43234900  | 0.81543700  |
| H                                                 | -4.37493500 | 3.90068800  | -0.40911500 |
| H                                                 | -2.58107400 | 1.47180500  | -3.07735600 |
| H                                                 | -4.23366000 | 0.92290000  | -3.41750600 |
| H                                                 | -3.91286300 | 2.63346300  | -3.08747600 |
| H                                                 | -5.94467300 | 0.74254300  | -1.50188800 |
| H                                                 | -5.55916500 | 1.38948100  | 0.10273700  |
| H                                                 | -5.77309300 | 2.47723600  | -1.27532400 |
| H                                                 | 1.04221100  | 3.73342500  | 2.58612900  |
| H                                                 | 0.33309900  | 2.19800700  | 3.08579300  |
| H                                                 | 2.03688400  | 2.28168000  | 2.59595900  |
| H                                                 | 1.40317100  | 2.82959900  | -1.09163600 |
| H                                                 | 1.53614300  | 4.16368800  | 0.05461900  |
| H                                                 | 2.65879900  | 2.80514200  | 0.16838000  |
| C                                                 | 1.10442700  | -1.23315900 | -1.85974600 |
| H                                                 | 0.61869800  | -2.09364500 | -2.31865500 |
| H                                                 | 0.94527100  | -0.26361700 | -2.32885700 |
| C                                                 | 2.11323200  | -1.42135100 | -0.97414700 |
| H                                                 | 2.30864500  | -2.43812300 | -0.63518300 |
| C                                                 | 3.06502200  | -0.37803600 | -0.49460100 |
| H                                                 | 3.08429900  | -0.37125100 | 0.60317000  |
| H                                                 | 2.74711500  | 0.61319100  | -0.82988700 |
| C                                                 | 4.50050200  | -0.67485100 | -1.00231500 |
| H                                                 | 4.49676700  | -0.69314400 | -2.09904900 |
| H                                                 | 4.80395700  | -1.67742000 | -0.67343100 |
| C                                                 | 5.51579600  | 0.36131400  | -0.50240500 |
| H                                                 | 5.51388800  | 0.38114800  | 0.59509800  |
| H                                                 | 5.20669300  | 1.36259200  | -0.83165600 |
| C                                                 | 6.94687900  | 0.07973900  | -0.99920300 |
| H                                                 | 6.93529200  | 0.03834800  | -2.09833200 |
| H                                                 | 7.27060000  | -0.90885100 | -0.65061900 |
| C                                                 | 7.93111200  | 1.12470300  | -0.54582700 |
| H                                                 | 7.74305100  | 2.14003800  | -0.89775000 |
| C                                                 | 8.98200400  | 0.89350500  | 0.24064000  |
| H                                                 | 9.21043000  | -0.10341800 | 0.61095100  |
| H                                                 | 9.65992900  | 1.68844000  | 0.53590800  |
| <b>1TS<sub>21re</sub>, -1342.8623604, i294.65</b> |             |             |             |
| Ti                                                | -0.89013000 | -1.05767900 | -0.30047900 |
| O                                                 | -0.65678300 | 0.71482600  | -0.21784400 |

|   |             |             |             |
|---|-------------|-------------|-------------|
| C | -2.38531400 | -1.11898400 | 1.49628600  |
| C | -3.03882800 | -1.72735400 | 0.38291300  |
| C | -2.35551700 | -2.95218600 | 0.07371400  |
| C | -1.28796700 | -3.10076500 | 1.00288400  |
| C | -1.28196500 | -1.95630500 | 1.86328200  |
| C | -0.83541400 | 2.06488900  | -0.00124700 |
| C | -0.12324400 | 2.70006200  | 1.04018200  |
| C | -1.89523500 | 4.13855600  | -0.61030800 |
| C | -1.72798300 | 2.77095800  | -0.84476000 |
| C | -2.84780000 | 0.11904900  | 2.20925600  |
| C | -4.30226800 | -1.23079400 | -0.26540500 |
| C | -2.79476400 | -3.97509300 | -0.93513200 |
| C | -0.42786700 | -4.32216500 | 1.15909000  |
| C | 0.87836300  | 1.97323900  | 1.92844100  |
| C | 0.59325300  | 2.17205800  | 3.43006200  |
| C | 2.31962800  | 2.41336600  | 1.59641500  |
| C | -2.43387400 | 2.08782400  | -2.00840700 |
| C | -1.54076200 | 2.11742900  | -3.26732500 |
| C | -3.82579600 | 2.66317800  | -2.31946900 |
| C | -0.33130500 | 4.07325200  | 1.21938100  |
| C | -1.20710400 | 4.78948200  | 0.41130400  |
| C | -0.36732400 | -1.74866700 | 3.03835900  |
| H | 0.79770500  | 0.90188400  | 1.71700400  |
| H | -2.58426100 | 1.03813400  | -1.73072900 |
| C | -1.08577300 | -1.48513000 | -2.36774600 |
| H | -1.34454700 | -2.36463000 | -2.95365500 |
| H | -2.06295600 | -1.08242500 | -1.97870200 |
| H | -0.64323000 | -0.71055400 | -2.99431800 |
| H | -3.50680100 | -4.67394400 | -0.47985000 |
| H | -3.29801700 | -3.52207300 | -1.79330700 |
| H | -1.95816400 | -4.57123200 | -1.31022600 |
| H | -0.98042500 | -5.09059500 | 1.71332600  |
| H | -0.14316300 | -4.76856000 | 0.20199800  |
| H | 0.48352200  | -4.12017500 | 1.72657400  |
| H | -0.74817400 | -2.29152400 | 3.91213100  |
| H | 0.64451400  | -2.11740300 | 2.84766100  |
| H | -0.29282700 | -0.69623700 | 3.31791600  |
| H | -3.62765300 | -0.13846300 | 2.93606000  |
| H | -2.03734100 | 0.60324200  | 2.75562900  |
| H | -3.26875900 | 0.85770700  | 1.52287800  |
| H | -5.17403900 | -1.60670600 | 0.28402500  |
| H | -4.36645900 | -0.13974800 | -0.26241800 |
| H | -4.40299500 | -1.57450600 | -1.29827500 |
| H | 0.20722300  | 4.58942500  | 2.00789700  |

|                                         |             |             |             |
|-----------------------------------------|-------------|-------------|-------------|
| H                                       | -1.35198100 | 5.85299300  | 0.57285300  |
| H                                       | -2.57265000 | 4.70643600  | -1.23830400 |
| H                                       | -0.55011200 | 1.69536100  | -3.06915200 |
| H                                       | -2.00189500 | 1.55776100  | -4.08873600 |
| H                                       | -1.39333700 | 3.14814300  | -3.60559900 |
| H                                       | -4.32581500 | 2.04471200  | -3.07156900 |
| H                                       | -4.46007600 | 2.69629200  | -1.42809500 |
| H                                       | -3.76879600 | 3.67638300  | -2.72855500 |
| H                                       | 0.72971200  | 3.21486500  | 3.73187100  |
| H                                       | -0.43028500 | 1.88882700  | 3.69573400  |
| H                                       | 1.28260900  | 1.56945100  | 4.03079300  |
| H                                       | 2.55352500  | 2.26335600  | 0.53856800  |
| H                                       | 2.46305600  | 3.47569100  | 1.81811500  |
| H                                       | 3.04464100  | 1.85001400  | 2.19403500  |
| C                                       | 0.73429300  | -2.41467300 | -1.62276500 |
| H                                       | 0.33170900  | -3.42116900 | -1.62841300 |
| H                                       | 1.12587800  | -2.07257800 | -2.57567300 |
| C                                       | 1.23105300  | -1.86226000 | -0.43361600 |
| H                                       | 1.28207000  | -2.53446700 | 0.41901400  |
| C                                       | 2.28015800  | -0.76243700 | -0.47878600 |
| H                                       | 2.27663400  | -0.19894500 | 0.45816100  |
| H                                       | 2.04179200  | -0.04516800 | -1.27413400 |
| C                                       | 3.69554100  | -1.33667900 | -0.71002100 |
| H                                       | 3.70717900  | -1.90206400 | -1.65176500 |
| H                                       | 3.92568100  | -2.05988700 | 0.08408000  |
| C                                       | 4.77827000  | -0.25080600 | -0.74610100 |
| H                                       | 4.76751500  | 0.31426500  | 0.19465600  |
| H                                       | 4.54447100  | 0.47094800  | -1.54112700 |
| C                                       | 6.19221200  | -0.81963300 | -0.97373100 |
| H                                       | 6.19049700  | -1.39978700 | -1.90857900 |
| H                                       | 6.44080000  | -1.52273500 | -0.16895600 |
| C                                       | 7.24433700  | 0.25388900  | -1.05156500 |
| H                                       | 7.12983100  | 0.97421000  | -1.86299500 |
| C                                       | 8.27129200  | 0.38063500  | -0.21140300 |
| H                                       | 8.42723000  | -0.31612400 | 0.60924000  |
| H                                       | 9.00032300  | 1.17830700  | -0.31648300 |
| <b>1P<sub>21re</sub>, -1342.8872883</b> |             |             |             |
| Ti                                      | -0.76400800 | -1.07762600 | -0.18327500 |
| O                                       | -0.65851400 | 0.70253800  | -0.13480000 |
| C                                       | -2.42468900 | -1.19237900 | 1.44276300  |
| C                                       | -2.91989200 | -1.87639500 | 0.29568700  |
| C                                       | -2.11660400 | -3.04950800 | 0.09261500  |
| C                                       | -1.13307100 | -3.09587100 | 1.12352500  |
| C                                       | -1.29632200 | -1.93138000 | 1.93749200  |

|   |             |             |             |
|---|-------------|-------------|-------------|
| C | -0.93798300 | 2.04517800  | -0.02839900 |
| C | -0.29652600 | 2.79801300  | 0.97951200  |
| C | -2.09130300 | 3.99549600  | -0.83236700 |
| C | -1.84364200 | 2.62430600  | -0.94825900 |
| C | -3.02961800 | 0.03217700  | 2.06746900  |
| C | -4.13442200 | -1.49443100 | -0.50512600 |
| C | -2.37997400 | -4.12729500 | -0.92347600 |
| C | -0.19593000 | -4.23563100 | 1.39176200  |
| C | 0.70214500  | 2.18695300  | 1.95431000  |
| C | 0.31331100  | 2.43992400  | 3.42406600  |
| C | 2.12952200  | 2.70057300  | 1.67487300  |
| C | -2.48076300 | 1.81817900  | -2.07323900 |
| C | -1.69415700 | 2.00643400  | -3.38771700 |
| C | -3.97226900 | 2.13626600  | -2.28151800 |
| C | -0.58922300 | 4.16511500  | 1.04471100  |
| C | -1.47519400 | 4.76301000  | 0.15365200  |
| C | -0.49848200 | -1.60554200 | 3.16833800  |
| H | 0.70412800  | 1.10397400  | 1.79535300  |
| H | -2.41972300 | 0.75702000  | -1.80012400 |
| C | -0.31343100 | -1.56344900 | -2.51240400 |
| H | -0.42841100 | -2.07918700 | -3.46865400 |
| H | -1.37095600 | -1.57778800 | -2.14451200 |
| H | -0.03046000 | -0.52944200 | -2.72603200 |
| H | -3.08773800 | -4.85945000 | -0.51625300 |
| H | -2.82369900 | -3.73545000 | -1.84286400 |
| H | -1.47359100 | -4.67695900 | -1.19041900 |
| H | -0.72970600 | -5.03911500 | 1.91367900  |
| H | 0.21351700  | -4.66926200 | 0.47452200  |
| H | 0.63921600  | -3.93819400 | 2.02930200  |
| H | -0.91927000 | -2.12523900 | 4.03794100  |
| H | 0.54459100  | -1.91828900 | 3.07428300  |
| H | -0.51044000 | -0.53709700 | 3.39262800  |
| H | -3.83492800 | -0.25736200 | 2.75314200  |
| H | -2.29769600 | 0.60104500  | 2.64347900  |
| H | -3.45767700 | 0.70728900  | 1.32275700  |
| H | -5.02253900 | -1.99298600 | -0.09760000 |
| H | -4.32518100 | -0.41957600 | -0.47550800 |
| H | -4.05483600 | -1.79517800 | -1.55385100 |
| H | -0.10984900 | 4.77195200  | 1.80655300  |
| H | -1.68410000 | 5.82579900  | 0.22425800  |
| H | -2.77485700 | 4.47294600  | -1.52665700 |
| H | -0.63403300 | 1.76114900  | -3.26273400 |
| H | -2.10621200 | 1.37841300  | -4.18540000 |
| H | -1.74703900 | 3.04756600  | -3.72155000 |

|   |             |             |             |
|---|-------------|-------------|-------------|
| H | -4.40486400 | 1.45487300  | -3.02121800 |
| H | -4.54101300 | 2.03915300  | -1.35128600 |
| H | -4.12319200 | 3.15280700  | -2.65650400 |
| H | 0.34911800  | 3.50478900  | 3.67378900  |
| H | -0.69996400 | 2.08796300  | 3.64486800  |
| H | 1.00853700  | 1.92545800  | 4.09567600  |
| H | 2.43475200  | 2.49629100  | 0.64441100  |
| H | 2.19618900  | 3.78184500  | 1.83255800  |
| H | 2.84978800  | 2.22267700  | 2.34756200  |
| C | 0.76348200  | -2.32979100 | -1.66588900 |
| H | 0.46170500  | -3.37605500 | -1.58781800 |
| H | 1.65882900  | -2.29815200 | -2.29561600 |
| C | 1.17599400  | -1.75991500 | -0.26789900 |
| H | 1.49156600  | -2.58314400 | 0.37186900  |
| C | 2.25956500  | -0.67439100 | -0.32001000 |
| H | 2.30185700  | -0.17501900 | 0.65465600  |
| H | 1.99443100  | 0.10711600  | -1.04454000 |
| C | 3.66656800  | -1.21720500 | -0.64377700 |
| H | 3.66297800  | -1.72826300 | -1.61685200 |
| H | 3.93450500  | -1.98027000 | 0.09980400  |
| C | 4.73830500  | -0.11912600 | -0.66068900 |
| H | 4.75237300  | 0.39713200  | 0.30781000  |
| H | 4.47145600  | 0.63993500  | -1.40934400 |
| C | 6.15003900  | -0.65773000 | -0.96246000 |
| H | 6.12456100  | -1.18835000 | -1.92615800 |
| H | 6.43147600  | -1.39913800 | -0.20419800 |
| C | 7.18872900  | 0.43014600  | -1.01682900 |
| H | 7.04067300  | 1.19132800  | -1.78441800 |
| C | 8.24131500  | 0.52426500  | -0.20453100 |
| H | 8.43067200  | -0.21303100 | 0.57250600  |
| H | 8.95845400  | 1.33497600  | -0.28995900 |

**1C<sub>21si</sub>, -1342.8788741**

|    |             |             |             |
|----|-------------|-------------|-------------|
| Ti | 0.57754200  | 1.03511300  | -0.34329500 |
| O  | 1.57831100  | -0.43795200 | -0.40522500 |
| C  | 1.22752400  | 1.53712600  | 1.85859600  |
| C  | 1.77354600  | 2.54626500  | 1.00562400  |
| C  | 0.68994600  | 3.30989000  | 0.46112500  |
| C  | -0.52516900 | 2.74551000  | 0.94479800  |
| C  | -0.19248700 | 1.65054500  | 1.81267900  |
| C  | 2.45388200  | -1.47611200 | -0.18960500 |
| C  | 2.01484700  | -2.60064400 | 0.54490500  |
| C  | 4.61860400  | -2.46259000 | -0.51843400 |
| C  | 3.75401200  | -1.38553700 | -0.73849600 |
| C  | 2.02028900  | 0.59765900  | 2.72099300  |

|   |             |             |             |
|---|-------------|-------------|-------------|
| C | 3.23465300  | 2.83934100  | 0.82492800  |
| C | 0.81521300  | 4.58001500  | -0.32560400 |
| C | -1.89433900 | 3.31605800  | 0.69849900  |
| C | 0.58929600  | -2.72088800 | 1.06786200  |
| C | 0.51221900  | -3.27287200 | 2.50297000  |
| C | -0.26379100 | -3.57930800 | 0.10943600  |
| C | 4.18220600  | -0.19850300 | -1.59143800 |
| C | 3.93254200  | -0.49644400 | -3.08552900 |
| C | 5.64170600  | 0.22870900  | -1.35780700 |
| C | 2.92517300  | -3.64739900 | 0.72431200  |
| C | 4.21535400  | -3.58249600 | 0.20487300  |
| C | -1.15070100 | 0.84699500  | 2.64828800  |
| H | 0.15808700  | -1.71262700 | 1.08602300  |
| H | 3.54905300  | 0.65077300  | -1.31800600 |
| C | 1.12888800  | 2.01149900  | -2.09796200 |
| H | 0.38805200  | 2.76579600  | -2.38607400 |
| H | 2.11117600  | 2.49069000  | -2.06942400 |
| H | 1.15847200  | 1.21651100  | -2.85394200 |
| H | 0.89340400  | 5.43198600  | 0.36087600  |
| H | 1.70541000  | 4.59029300  | -0.95796000 |
| H | -0.05384100 | 4.75680100  | -0.96406900 |
| H | -2.04143400 | 4.21270400  | 1.31276600  |
| H | -2.03661300 | 3.61806600  | -0.34361400 |
| H | -2.68750900 | 2.61438700  | 0.95982400  |
| H | -1.16287500 | 1.23474100  | 3.67416600  |
| H | -2.17350500 | 0.90519400  | 2.27274600  |
| H | -0.86909200 | -0.20792400 | 2.70993200  |
| H | 2.34973200  | 1.11503200  | 3.63019500  |
| H | 1.42908800  | -0.26517900 | 3.03326000  |
| H | 2.91321000  | 0.22354200  | 2.21449500  |
| H | 3.56978300  | 3.54372000  | 1.59663700  |
| H | 3.84764800  | 1.94015600  | 0.91941600  |
| H | 3.44677600  | 3.29632200  | -0.14434100 |
| H | 2.61912900  | -4.52907300 | 1.27783500  |
| H | 4.90507100  | -4.40621700 | 0.35978200  |
| H | 5.62372100  | -2.42683400 | -0.92461500 |
| H | 2.88589300  | -0.75620800 | -3.27353300 |
| H | 4.18569400  | 0.37295300  | -3.70145400 |
| H | 4.54809000  | -1.33789400 | -3.42027000 |
| H | 5.85195000  | 1.15355000  | -1.90425900 |
| H | 5.84924400  | 0.40476300  | -0.29739200 |
| H | 6.35267300  | -0.52175200 | -1.71682700 |
| H | 0.82930300  | -4.31872300 | 2.55404300  |
| H | -0.51902200 | -3.23414000 | 2.86971500  |

|                                                   |              |             |             |
|---------------------------------------------------|--------------|-------------|-------------|
| H                                                 | -0.26402000  | -3.17162800 | -0.90710900 |
| H                                                 | 0.13049700   | -4.59860600 | 0.05007600  |
| H                                                 | -1.30046800  | -3.64827900 | 0.45987100  |
| C                                                 | -1.37916400  | 0.14559800  | -1.62296000 |
| H                                                 | -1.65194900  | 1.03789800  | -2.18322800 |
| H                                                 | -0.56954200  | -0.46631000 | -2.01959500 |
| C                                                 | -2.22214600  | -0.37452700 | -0.69800600 |
| H                                                 | -1.95412700  | -1.32807900 | -0.24117700 |
| C                                                 | -3.56544400  | 0.16840600  | -0.33834500 |
| H                                                 | -3.67849400  | 0.20837900  | 0.75220400  |
| H                                                 | -3.69142800  | 1.18227900  | -0.73182600 |
| C                                                 | -4.68183700  | -0.75212500 | -0.90108400 |
| H                                                 | -4.58680700  | -0.80335300 | -1.99256300 |
| H                                                 | -4.53567300  | -1.77302100 | -0.52529600 |
| C                                                 | -6.08363100  | -0.25759800 | -0.52043200 |
| H                                                 | -6.22334700  | 0.76598600  | -0.89360800 |
| H                                                 | -6.17284800  | -0.20407100 | 0.57222000  |
| C                                                 | -7.20244200  | -1.16101700 | -1.07391800 |
| H                                                 | -7.09293100  | -1.22660700 | -2.16646500 |
| H                                                 | -7.08111800  | -2.17925400 | -0.68398700 |
| C                                                 | -8.57720500  | -0.64905000 | -0.73599700 |
| H                                                 | -8.83158300  | 0.33272600  | -1.13785300 |
| C                                                 | -9.47224400  | -1.29897500 | 0.00754000  |
| H                                                 | -9.26320100  | -2.28145700 | 0.42489200  |
| H                                                 | -10.45097600 | -0.87953900 | 0.21927600  |
| H                                                 | 1.14303400   | -2.70254500 | 3.19165400  |
| <b>1TS<sub>21si</sub>, -1342.8566387, i325.66</b> |              |             |             |
| Ti                                                | 0.32273700   | 0.95718000  | -0.23898200 |
| O                                                 | 1.45196000   | -0.42010000 | -0.31820900 |
| C                                                 | 0.87004000   | 1.51947400  | 1.96597500  |
| C                                                 | 1.39664900   | 2.52236900  | 1.10285900  |
| C                                                 | 0.28955800   | 3.24184500  | 0.53170900  |
| C                                                 | -0.91215300  | 2.68543800  | 1.04688400  |
| C                                                 | -0.56049600  | 1.59686600  | 1.91209800  |
| C                                                 | 2.44728800   | -1.35755000 | -0.17001000 |
| C                                                 | 2.17235800   | -2.52628400 | 0.57547800  |
| C                                                 | 4.68420300   | -2.10042900 | -0.62958300 |
| C                                                 | 3.69815800   | -1.12125000 | -0.78544500 |
| C                                                 | 1.66842700   | 0.61370400  | 2.86039000  |
| C                                                 | 2.85193300   | 2.86099500  | 0.93175600  |
| C                                                 | 0.39110700   | 4.47494900  | -0.32028800 |
| C                                                 | -2.27789400  | 3.27774200  | 0.83999800  |
| C                                                 | 0.79936700   | -2.79186300 | 1.17974800  |
| C                                                 | 0.85942000   | -3.43619600 | 2.57605900  |



|   |             |             |             |
|---|-------------|-------------|-------------|
| C | -0.05311200 | -3.65108500 | 0.22120300  |
| C | 3.94516700  | 0.11362500  | -1.64236700 |
| C | 3.58192600  | -0.17309400 | -3.11539000 |
| C | 5.37747500  | 0.66382800  | -1.53453600 |
| C | 3.20072200  | -3.46713400 | 0.69413900  |
| C | 4.44403900  | -3.26120200 | 0.10209000  |
| C | -1.48230700 | 0.80749100  | 2.80213500  |
| H | 0.29780600  | -1.82376100 | 1.29594700  |
| H | 3.27479500  | 0.90212200  | -1.28234600 |
| C | 0.34933200  | 1.73154900  | -2.22807700 |
| H | -0.24255400 | 2.62783200  | -2.41335000 |
| H | 1.29515000  | 2.04170100  | -1.70146000 |
| H | 0.68387600  | 1.28947700  | -3.16375700 |
| H | 0.49032200  | 5.36355000  | 0.31472200  |
| H | 1.26313500  | 4.45591300  | -0.98034200 |
| H | -0.49758300 | 4.62128000  | -0.93981800 |
| H | -2.35657500 | 4.21391800  | 1.40592900  |
| H | -2.47414300 | 3.52286200  | -0.20806700 |
| H | -3.07512700 | 2.62106300  | 1.18645900  |
| H | -1.30278400 | 1.07419500  | 3.85010000  |
| H | -2.53233700 | 1.01481400  | 2.59356300  |
| H | -1.32815100 | -0.27278600 | 2.71634400  |
| H | 1.93777400  | 1.14343100  | 3.78239000  |
| H | 1.10152100  | -0.27361100 | 3.14958800  |
| H | 2.59709500  | 0.27945200  | 2.39156400  |
| H | 3.15287600  | 3.60024000  | 1.68440700  |
| H | 3.49376600  | 1.98648200  | 1.06087500  |
| H | 3.06576100  | 3.29756200  | -0.04768100 |
| H | 3.02551600  | -4.37726800 | 1.25778100  |
| H | 5.22591600  | -4.00648800 | 0.20884500  |
| H | 5.65571100  | -1.95456600 | -1.08908400 |
| H | 2.55228000  | -0.53280300 | -3.21401300 |
| H | 3.69545600  | 0.72794700  | -3.72818800 |
| H | 4.23832000  | -0.94498800 | -3.52976300 |
| H | 5.45418200  | 1.61519700  | -2.07043700 |
| H | 5.66909200  | 0.83420200  | -0.49361300 |
| H | 6.11124100  | -0.01341500 | -1.98192400 |
| H | 1.24770600  | -4.45839000 | 2.53832300  |
| H | -0.14537200 | -3.49314300 | 3.00705400  |
| H | -0.13992700 | -3.18986500 | -0.76833200 |
| H | 0.40139500  | -4.63715900 | 0.08161400  |
| H | -1.06127100 | -3.80158600 | 0.62293100  |
| C | -1.07267100 | 0.10236300  | -2.07124700 |
| H | -1.67533900 | 0.67411800  | -2.77133900 |

|   |             |             |             |
|---|-------------|-------------|-------------|
| H | -0.37457600 | -0.59374800 | -2.52255800 |
| C | -1.57646200 | -0.14736000 | -0.78096600 |
| H | -1.22910200 | -1.07880600 | -0.32632700 |
| C | -3.00047300 | 0.25075000  | -0.43960400 |
| H | -3.12910600 | 0.32976000  | 0.64231500  |
| H | -3.22638200 | 1.23644100  | -0.86243600 |
| C | -4.02057000 | -0.77555900 | -0.97936500 |
| H | -3.91620000 | -0.85152100 | -2.07020500 |
| H | -3.77894200 | -1.76947000 | -0.57893600 |
| C | -5.46802000 | -0.41590100 | -0.62155500 |
| H | -5.70769100 | 0.57831000  | -1.02392300 |
| H | -5.57159800 | -0.33939400 | 0.46885200  |
| C | -6.49124300 | -1.43954000 | -1.15033500 |
| H | -6.37054900 | -1.52450000 | -2.24058500 |
| H | -6.27104400 | -2.42987400 | -0.73254600 |
| C | -7.91209000 | -1.05936600 | -0.83085000 |
| H | -8.25939500 | -0.11644300 | -1.25591500 |
| C | -8.74467600 | -1.77693700 | -0.07689200 |
| H | -8.44316000 | -2.72458800 | 0.36389600  |
| H | -9.76120600 | -1.45088800 | 0.12095700  |
| H | 1.49351100  | -2.86340600 | 3.25971100  |

**1P<sub>21si</sub>, -1342.8830711**

|    |             |             |             |
|----|-------------|-------------|-------------|
| Ti | -0.20729700 | -0.85827200 | -0.09796800 |
| O  | -1.39453600 | 0.45855000  | -0.28100100 |
| C  | -0.77505100 | -1.42806500 | 2.07221100  |
| C  | -1.45439800 | -2.33922500 | 1.21229600  |
| C  | -0.46516200 | -3.13494600 | 0.55317700  |
| C  | 0.82285300  | -2.75397000 | 1.04981400  |
| C  | 0.63801800  | -1.69235000 | 1.98162500  |
| C  | -2.50033500 | 1.26906900  | -0.21583100 |
| C  | -2.42230800 | 2.45133600  | 0.55383500  |
| C  | -4.76174900 | 1.75179300  | -0.85854600 |
| C  | -3.65514400 | 0.90111000  | -0.94380500 |
| C  | -1.42810400 | -0.47628600 | 3.03488900  |
| C  | -2.94560200 | -2.48363000 | 1.09604000  |
| C  | -0.73885400 | -4.27690100 | -0.38836100 |
| C  | 2.11052500  | -3.45867600 | 0.72712600  |
| C  | -1.12852600 | 2.86708500  | 1.24323200  |
| C  | -1.34789300 | 3.56418000  | 2.59650200  |
| C  | -0.28553500 | 3.75558900  | 0.30287200  |
| C  | -3.66325600 | -0.32100300 | -1.85454000 |
| C  | -3.14551600 | 0.05510600  | -3.26011500 |
| C  | -5.03176500 | -1.01522200 | -1.95072300 |
| C  | -3.56473000 | 3.25730200  | 0.60207200  |

|   |             |             |             |
|---|-------------|-------------|-------------|
| C | -4.72395300 | 2.91316500  | -0.08923000 |
| C | 1.67000000  | -1.08298500 | 2.88828900  |
| H | -0.55060200 | 1.95665600  | 1.43799300  |
| H | -2.96537500 | -1.05422300 | -1.42959900 |
| C | 0.42579400  | -1.43288300 | -2.39153700 |
| H | 1.03927700  | -2.29120600 | -2.10038200 |
| H | -0.62460900 | -1.61214400 | -2.05336600 |
| H | 0.29799200  | -1.47408300 | -3.47571100 |
| H | -0.90435300 | -5.20007000 | 0.18007000  |
| H | -1.63362700 | -4.11089400 | -0.99483300 |
| H | 0.09912700  | -4.46576300 | -1.06441600 |
| H | 2.15121300  | -4.41724000 | 1.25867100  |
| H | 2.21039100  | -3.68697200 | -0.33892000 |
| H | 2.98407000  | -2.87978000 | 1.02730400  |
| H | 1.50318000  | -1.42741400 | 3.91589600  |
| H | 2.68384200  | -1.37329800 | 2.61138700  |
| H | 1.62235200  | 0.00975800  | 2.90349500  |
| H | -1.71037300 | -1.00915300 | 3.95131500  |
| H | -0.75610300 | 0.33421500  | 3.32525900  |
| H | -2.33636500 | -0.03083800 | 2.62188600  |
| H | -3.32173400 | -3.10758900 | 1.91617300  |
| H | -3.45828300 | -1.52053400 | 1.15851300  |
| H | -3.24285000 | -2.96700400 | 0.16262700  |
| H | -3.54664400 | 4.17116000  | 1.18594800  |
| H | -5.59761900 | 3.55504700  | -0.03525200 |
| H | -5.66691600 | 1.50598700  | -1.40295900 |
| H | -2.14953600 | 0.50842800  | -3.21617100 |
| H | -3.09837300 | -0.82721800 | -3.90825200 |
| H | -3.81378600 | 0.78161300  | -3.73291800 |
| H | -4.94018600 | -1.94835000 | -2.51571300 |
| H | -5.43734800 | -1.25234000 | -0.96262700 |
| H | -5.76595600 | -0.39688000 | -2.47596900 |
| H | -1.81797100 | 4.54556600  | 2.48051700  |
| H | -0.38602200 | 3.72917100  | 3.09232500  |
| H | -0.07852700 | 3.25288700  | -0.64765200 |
| H | -0.81375000 | 4.68692600  | 0.07409500  |
| H | 0.67004700  | 4.01757500  | 0.77009600  |
| C | 1.08405500  | -0.06277100 | -2.01498700 |
| H | 1.99677200  | -0.02699200 | -2.61736700 |
| H | 0.43377300  | 0.74369600  | -2.36047100 |
| C | 1.53710200  | 0.14552400  | -0.52325600 |
| H | 1.33473400  | 1.18469100  | -0.23799100 |
| C | 3.00124400  | -0.20005400 | -0.27039400 |
| H | 3.17564300  | -0.25619900 | 0.80832900  |

|   |             |             |             |
|---|-------------|-------------|-------------|
| H | 3.23232500  | -1.19521800 | -0.67278900 |
| C | 3.99622300  | 0.82371000  | -0.85514700 |
| H | 3.85480400  | 0.91487100  | -1.94123300 |
| H | 3.77464600  | 1.81470700  | -0.43591000 |
| C | 5.45927000  | 0.46069600  | -0.56931400 |
| H | 5.67964700  | -0.52903000 | -0.99360200 |
| H | 5.61235700  | 0.37085400  | 0.51417000  |
| C | 6.45911400  | 1.48912300  | -1.13191300 |
| H | 6.28851800  | 1.58809800  | -2.21447600 |
| H | 6.26036300  | 2.47456600  | -0.69236400 |
| C | 7.89266200  | 1.10360600  | -0.88366300 |
| H | 8.21790500  | 0.16503400  | -1.33515400 |
| C | 8.76116100  | 1.81076600  | -0.16101100 |
| H | 8.48252100  | 2.75351400  | 0.30462500  |
| H | 9.78501600  | 1.48056700  | -0.01432200 |
| H | -1.97762500 | 2.96725500  | 3.26339100  |

**Table S3** Optimized Cartesian coordinates (Å) and zero-point energy corrected energy (a.u.) of **2C<sub>12f</sub>**, **2TS<sub>12f</sub>**, **2P<sub>12f</sub>**, **2C<sub>12b</sub>**, **2TS<sub>12b</sub>**, **2P<sub>12b</sub>**, **2C<sub>21f</sub>**, **2TS<sub>21f</sub>**, **2P<sub>21f</sub>**, **2C<sub>21b</sub>**, **2TS<sub>21b</sub>** and **2P<sub>21b</sub>**, as well as the imaginary frequency (cm<sup>-1</sup>) of **2TS<sub>12f</sub>**, **2P<sub>12b</sub>**, **2TS<sub>21f</sub>**, and **2TS<sub>21b</sub>**.

| Atom                                   | x           | y           | z           |
|----------------------------------------|-------------|-------------|-------------|
| <b>2C<sub>12f</sub>, -1655.7750764</b> |             |             |             |
| Ti                                     | -0.06471800 | -1.16723300 | -0.08532800 |
| O                                      | 1.61958700  | -0.58034600 | 0.05783700  |
| C                                      | -1.49322400 | -3.07928400 | 0.42819400  |
| C                                      | -1.50379600 | -2.95036400 | -0.98861700 |
| C                                      | -0.16132600 | -3.10871000 | -1.45365800 |
| C                                      | 0.67465800  | -3.38191400 | -0.31893700 |
| C                                      | -0.14816600 | -3.35295200 | 0.84243000  |
| C                                      | 2.98494700  | -0.48123700 | 0.22224600  |
| C                                      | 3.52117200  | -0.54482200 | 1.53217100  |
| C                                      | 5.18850200  | -0.20624900 | -0.70485300 |
| C                                      | 3.80767800  | -0.30255200 | -0.91407600 |
| C                                      | -2.71340000 | -3.14852600 | 1.30178500  |
| C                                      | -2.73349500 | -2.83498900 | -1.84104800 |
| C                                      | 0.26972400  | -3.15059100 | -2.89163400 |
| C                                      | 2.12416900  | -3.77021500 | -0.35933700 |
| C                                      | 2.63618000  | -0.64935800 | 2.76743800  |
| C                                      | 2.35791000  | 0.75449600  | 3.34684200  |
| C                                      | 3.20427700  | -1.57782500 | 3.85590300  |
| C                                      | 3.26222200  | -0.18354700 | -2.33169400 |
| C                                      | 3.84586400  | -1.25468000 | -3.27475700 |
| C                                      | 3.51890300  | 1.22454200  | -2.90764900 |

|   |             |             |             |
|---|-------------|-------------|-------------|
| C | 4.90794100  | -0.43637400 | 1.67320600  |
| C | 5.74090900  | -0.27399200 | 0.56931700  |
| C | 0.28602900  | -3.69685400 | 2.23971300  |
| H | 1.67956500  | -1.08095800 | 2.45432400  |
| H | 2.18028300  | -0.33053300 | -2.28696800 |
| H | 0.17883600  | -4.17354400 | -3.27729500 |
| H | -0.34572000 | -2.50704400 | -3.52383000 |
| H | 1.31158000  | -2.84894100 | -3.01715900 |
| H | 2.21360500  | -4.86208700 | -0.41396900 |
| H | 2.63472600  | -3.35673800 | -1.23020000 |
| H | 2.66818800  | -3.43814000 | 0.52745400  |
| H | 1.35056900  | -3.51412400 | 2.39620500  |
| H | -0.26754500 | -3.14223900 | 3.00305900  |
| H | 0.10796100  | -4.76235100 | 2.43219200  |
| H | -3.09411600 | -4.17758400 | 1.32087400  |
| H | -2.50498500 | -2.87260600 | 2.33864200  |
| H | -3.52292000 | -2.51516900 | 0.93154000  |
| H | -3.21263200 | -3.81749200 | -1.93406000 |
| H | -3.47509700 | -2.15371400 | -1.41379900 |
| H | -2.50410000 | -2.49375700 | -2.85217100 |
| H | 5.34465400  | -0.47595400 | 2.66536900  |
| H | 6.81497700  | -0.19424300 | 0.70413200  |
| H | 5.84161700  | -0.06946800 | -1.56113000 |
| H | 3.68847000  | -2.26888100 | -2.89388600 |
| H | 3.38160500  | -1.18533600 | -4.26412800 |
| H | 4.92384600  | -1.12424700 | -3.41125200 |
| H | 3.05056500  | 1.32814600  | -3.89220700 |
| H | 3.12260500  | 2.00659500  | -2.25393400 |
| H | 4.59071000  | 1.41075200  | -3.03015700 |
| H | 3.28673200  | 1.21262200  | 3.70135600  |
| H | 1.93533700  | 1.42867500  | 2.59372300  |
| H | 1.66597300  | 0.70071200  | 4.19478800  |
| H | 3.45719100  | -2.56524300 | 3.45675100  |
| H | 4.10741800  | -1.16541200 | 4.31523000  |
| H | 2.47092300  | -1.71035500 | 4.65790900  |
| C | -1.04694500 | 1.41935700  | -1.66591900 |
| C | -0.76263800 | -0.10176100 | -1.77016800 |
| H | 0.07732300  | -0.26765600 | -2.46460400 |
| H | -1.63133300 | -0.58021500 | -2.22757500 |
| C | 0.08862800  | 2.23288400  | -1.01216500 |
| H | 0.34589800  | 1.79670500  | -0.03649800 |
| H | 0.99499900  | 2.12489000  | -1.62085600 |
| C | -0.20928800 | 3.72569300  | -0.80491500 |
| H | -0.34341800 | 4.21956600  | -1.77448600 |

|                                                  |              |             |             |
|--------------------------------------------------|--------------|-------------|-------------|
| H                                                | -1.16667700  | 3.84236500  | -0.27356800 |
| C                                                | 0.89378900   | 4.45324900  | -0.02468000 |
| H                                                | 1.01857100   | 3.98150300  | 0.96124200  |
| H                                                | 1.85380900   | 4.33071100  | -0.54294500 |
| C                                                | 0.61616800   | 5.95662100  | 0.16405300  |
| H                                                | 0.52616400   | 6.43976300  | -0.81677300 |
| H                                                | -0.35903500  | 6.07363500  | 0.66078200  |
| C                                                | 1.67707800   | 6.65081200  | 0.97485000  |
| H                                                | 1.80767400   | 6.28943500  | 1.99638400  |
| C                                                | 2.45169400   | 7.64265400  | 0.53556100  |
| H                                                | 2.35597800   | 8.03738900  | -0.47346300 |
| H                                                | 3.20438100   | 8.10357300  | 1.16803200  |
| C                                                | -1.38792600  | 1.95050400  | -3.07445400 |
| H                                                | -0.51251900  | 1.89587300  | -3.73201600 |
| H                                                | -2.18817400  | 1.36165900  | -3.53381900 |
| H                                                | -1.72195100  | 2.99174900  | -3.04353200 |
| H                                                | -1.95263300  | 1.54905100  | -1.05641400 |
| C                                                | -2.04532000  | 0.71109600  | 1.62251300  |
| H                                                | -1.81491500  | 1.66374300  | 1.14607300  |
| C                                                | -1.00571400  | -0.07478400 | 1.99426500  |
| H                                                | 0.00002200   | 0.34149700  | 1.99307600  |
| H                                                | -1.17554700  | -0.97518600 | 2.57923400  |
| C                                                | -3.49377000  | 0.44708700  | 1.86497800  |
| H                                                | -3.63927200  | -0.54964500 | 2.29304100  |
| H                                                | -3.80275700  | 1.16548200  | 2.64158300  |
| C                                                | -4.39654700  | 0.66112000  | 0.63266000  |
| H                                                | -4.10532900  | -0.04146300 | -0.16000500 |
| H                                                | -4.22557600  | 1.66738800  | 0.22830700  |
| C                                                | -5.88538900  | 0.48555200  | 0.95801000  |
| H                                                | -6.05515500  | -0.51889200 | 1.37008400  |
| H                                                | -6.17416200  | 1.19237300  | 1.74621100  |
| C                                                | -6.79576700  | 0.69651000  | -0.26643600 |
| H                                                | -6.48630800  | -0.00144000 | -1.05945800 |
| H                                                | -6.64881400  | 1.70814500  | -0.66475600 |
| C                                                | -8.25219900  | 0.48324400  | 0.04926300  |
| H                                                | -8.52328500  | -0.51520200 | 0.39549600  |
| C                                                | -9.20006100  | 1.41417200  | -0.05583700 |
| H                                                | -8.97596400  | 2.42194200  | -0.39827200 |
| H                                                | -10.23652600 | 1.20372900  | 0.18921600  |
| <b>2TS<sub>12f</sub>, -1655.7715552, i213.39</b> |              |             |             |
| Ti                                               | -0.25605900  | -1.34938700 | -0.04146000 |
| O                                                | 1.41233700   | -0.72811100 | 0.13870200  |
| C                                                | -1.70088400  | -3.37595600 | 0.17957500  |
| C                                                | -1.64542200  | -2.99077200 | -1.18400700 |

|   |             |             |             |
|---|-------------|-------------|-------------|
| C | -0.27304200 | -3.07573400 | -1.61124700 |
| C | 0.50985600  | -3.51912700 | -0.50158100 |
| C | -0.36497400 | -3.65615800 | 0.61905000  |
| C | 2.77281800  | -0.54392900 | 0.25697600  |
| C | 3.35340400  | -0.66506800 | 1.54402600  |
| C | 4.91852100  | -0.02521500 | -0.69947100 |
| C | 3.54563500  | -0.23095700 | -0.88575300 |
| C | -2.93962900 | -3.64894700 | 0.98197800  |
| C | -2.81546600 | -2.71695700 | -2.08647300 |
| C | 0.19970700  | -2.91596700 | -3.03060800 |
| C | 1.96873800  | -3.87370200 | -0.51699800 |
| C | 2.51577300  | -0.97064100 | 2.77913000  |
| C | 2.07248000  | 0.33911500  | 3.46546800  |
| C | 3.21858200  | -1.89762300 | 3.78673500  |
| C | 2.97072900  | -0.10969200 | -2.29299100 |
| C | 3.59574900  | -1.14375300 | -3.25294200 |
| C | 3.16121700  | 1.30806900  | -2.87151400 |
| C | 4.72919600  | -0.44886000 | 1.66073700  |
| C | 5.51083300  | -0.12832300 | 0.55379900  |
| C | 0.01260900  | -4.18829900 | 1.97251700  |
| H | 1.61596800  | -1.49692300 | 2.44372800  |
| H | 1.89480700  | -0.30836100 | -2.23805500 |
| H | 0.05404100  | -3.85515500 | -3.57862200 |
| H | -0.35569800 | -2.14277200 | -3.56889100 |
| H | 1.26035200  | -2.66913500 | -3.08694400 |
| H | 2.08779400  | -4.95284300 | -0.67248900 |
| H | 2.50531400  | -3.36532500 | -1.31890900 |
| H | 2.46608900  | -3.62046800 | 0.42219800  |
| H | 1.06014300  | -3.99184700 | 2.21188400  |
| H | -0.60164500 | -3.76303900 | 2.77110500  |
| H | -0.12864400 | -5.27602500 | 2.00380500  |
| H | -3.11894100 | -4.73103900 | 1.00861500  |
| H | -2.85923500 | -3.32266700 | 2.02295000  |
| H | -3.82937000 | -3.18922300 | 0.54792200  |
| H | -3.13679900 | -3.64013200 | -2.58372800 |
| H | -3.67899600 | -2.32800200 | -1.54044400 |
| H | -2.56844100 | -2.00102100 | -2.87553700 |
| H | 5.19825000  | -0.53126200 | 2.63519900  |
| H | 6.57725100  | 0.03785100  | 0.66897500  |
| H | 5.53466700  | 0.22066300  | -1.55873900 |
| H | 3.50759200  | -2.16650800 | -2.87428800 |
| H | 3.11406300  | -1.09736100 | -4.23538300 |
| H | 4.66190600  | -0.94785200 | -3.40257000 |
| H | 2.67274200  | 1.39175700  | -3.84830600 |

|   |             |             |             |
|---|-------------|-------------|-------------|
| H | 2.75002700  | 2.07926100  | -2.21517000 |
| H | 4.22236700  | 1.53377600  | -3.01570800 |
| H | 2.94267700  | 0.89050700  | 3.83606700  |
| H | 1.54200500  | 1.00016100  | 2.77164400  |
| H | 1.41865500  | 0.13349400  | 4.32063100  |
| H | 3.58273700  | -2.81279000 | 3.30917100  |
| H | 4.07140800  | -1.41100400 | 4.26947900  |
| H | 2.52196700  | -2.18148900 | 4.58213800  |
| C | -1.15302100 | 1.72478300  | -1.22918500 |
| C | -1.36724200 | 0.21813800  | -1.01368200 |
| H | -0.60629000 | -0.32225300 | -1.67002300 |
| H | -2.33813500 | -0.08984900 | -1.40603000 |
| C | 0.12570900  | 2.27780200  | -0.57043800 |
| H | 0.15637800  | 1.97215200  | 0.48416100  |
| H | 1.00146100  | 1.80997300  | -1.03234100 |
| C | 0.26576700  | 3.80646200  | -0.63024500 |
| H | 0.37736300  | 4.13438900  | -1.67106600 |
| H | -0.65824500 | 4.27378200  | -0.26008900 |
| C | 1.45719200  | 4.32548300  | 0.18631500  |
| H | 1.33797800  | 4.02423200  | 1.23688800  |
| H | 2.38272000  | 3.84907600  | -0.16316500 |
| C | 1.62240400  | 5.85515100  | 0.11217100  |
| H | 1.77508000  | 6.15960400  | -0.93082100 |
| H | 0.68337200  | 6.32499000  | 0.44124200  |
| C | 2.75865700  | 6.36178100  | 0.95894100  |
| H | 2.67704500  | 6.16714700  | 2.02961300  |
| C | 3.83039600  | 7.00650200  | 0.49795100  |
| H | 3.95279900  | 7.22642600  | -0.56029300 |
| H | 4.62077800  | 7.34792200  | 1.15956500  |
| C | -1.21405600 | 2.02913500  | -2.74132300 |
| H | -0.35681400 | 1.59205600  | -3.26683500 |
| H | -2.12818400 | 1.62921700  | -3.19205800 |
| H | -1.20178500 | 3.10633500  | -2.92490800 |
| H | -2.01245700 | 2.22859300  | -0.76869300 |
| C | -1.95916600 | 0.13637000  | 1.18498100  |
| H | -1.59920200 | 1.15928400  | 1.18534000  |
| C | -1.17186600 | -0.80922100 | 1.87808400  |
| H | -0.29758100 | -0.43214900 | 2.40357100  |
| H | -1.67328600 | -1.64430900 | 2.35402200  |
| C | -3.46409800 | -0.03297900 | 1.07856800  |
| H | -3.70525300 | -0.98498200 | 0.59671600  |
| H | -3.80452200 | -0.14283900 | 2.11909100  |
| C | -4.26193300 | 1.11028400  | 0.43739700  |
| H | -4.03794500 | 1.18656100  | -0.63337700 |



|                                        |             |             |             |
|----------------------------------------|-------------|-------------|-------------|
| H                                      | -3.95614900 | 2.06447100  | 0.88785200  |
| C                                      | -5.77586300 | 0.92912100  | 0.61648600  |
| H                                      | -6.08400100 | -0.02902200 | 0.17444000  |
| H                                      | -6.01610000 | 0.86417800  | 1.68546700  |
| C                                      | -6.59819200 | 2.06826500  | -0.01476200 |
| H                                      | -6.33739500 | 2.14063400  | -1.08154800 |
| H                                      | -6.31427400 | 3.02419100  | 0.44280700  |
| C                                      | -8.08253900 | 1.86109700  | 0.12542600  |
| H                                      | -8.48577000 | 0.96747200  | -0.35337500 |
| C                                      | -8.90826700 | 2.67248000  | 0.78577200  |
| H                                      | -8.55126400 | 3.57558300  | 1.27573400  |
| H                                      | -9.97265900 | 2.47037000  | 0.85572400  |
| <b>2P<sub>12f</sub>, -1655.7926734</b> |             |             |             |
| Ti                                     | 1.66743700  | -0.72827100 | -0.70164100 |
| O                                      | 1.65200800  | 0.42191000  | 0.65887000  |
| C                                      | 2.64799200  | -2.04389600 | -2.48772700 |
| C                                      | 2.84212900  | -0.65238300 | -2.76175500 |
| C                                      | 3.66277800  | -0.10440900 | -1.72710100 |
| C                                      | 3.93406900  | -1.14547900 | -0.78766800 |
| C                                      | 3.31475400  | -2.35298800 | -1.26691900 |
| C                                      | 2.00181100  | 1.33026500  | 1.62958400  |
| C                                      | 2.36486100  | 0.83773400  | 2.90538700  |
| C                                      | 2.32632200  | 3.59889000  | 2.34342000  |
| C                                      | 1.96604300  | 2.70925600  | 1.32483400  |
| C                                      | 1.93537600  | -3.03028700 | -3.36807600 |
| C                                      | 2.35707400  | 0.08917000  | -3.97848500 |
| C                                      | 4.22099500  | 1.28855700  | -1.66910400 |
| C                                      | 4.84187300  | -1.03014700 | 0.40478200  |
| C                                      | 2.30631200  | -0.65022400 | 3.22827300  |
| C                                      | 0.89506300  | -1.03329500 | 3.72387000  |
| C                                      | 3.37601400  | -1.10838800 | 4.23345900  |
| C                                      | 1.47493800  | 3.23424600  | -0.01854500 |
| C                                      | 2.34020500  | 4.37746500  | -0.57921200 |
| C                                      | 0.00047200  | 3.67685000  | 0.09031000  |
| C                                      | 2.72114000  | 1.77799900  | 3.87674100  |
| C                                      | 2.70723800  | 3.14425000  | 3.60275200  |
| C                                      | 3.49314500  | -3.72094400 | -0.67669900 |
| H                                      | 2.48587900  | -1.19729500 | 2.29602800  |
| H                                      | 1.52087700  | 2.40760800  | -0.73871200 |
| H                                      | 5.23233400  | 1.30127300  | -2.09389500 |
| H                                      | 3.62114500  | 1.99831400  | -2.24273300 |
| H                                      | 4.29293700  | 1.65749500  | -0.64334800 |
| H                                      | 5.88643800  | -1.13940800 | 0.08811600  |
| H                                      | 4.74934900  | -0.06071700 | 0.90064500  |

|   |             |             |             |
|---|-------------|-------------|-------------|
| H | 4.64440300  | -1.80829700 | 1.14504900  |
| H | 3.55721400  | -3.69497200 | 0.41372600  |
| H | 2.67962100  | -4.39627600 | -0.95017800 |
| H | 4.42398000  | -4.16674300 | -1.04816100 |
| H | 2.65912100  | -3.56141200 | -3.99830700 |
| H | 1.39797500  | -3.78804300 | -2.79105600 |
| H | 1.22314700  | -2.54501100 | -4.03964200 |
| H | 3.11547800  | 0.04936300  | -4.76980200 |
| H | 1.44032100  | -0.34135100 | -4.38839400 |
| H | 2.16939200  | 1.14608100  | -3.76956500 |
| H | 3.01035400  | 1.43840200  | 4.86518600  |
| H | 2.98686000  | 3.85470900  | 4.37434500  |
| H | 2.30441100  | 4.66594500  | 2.14810000  |
| H | 3.39867100  | 4.10536300  | -0.62439400 |
| H | 2.00968800  | 4.63877500  | -1.58985100 |
| H | 2.25570900  | 5.28394400  | 0.02765100  |
| H | -0.37751200 | 4.01131700  | -0.88203400 |
| H | -0.63843200 | 2.86430600  | 0.44812000  |
| H | -0.10012800 | 4.51084200  | 0.79235600  |
| H | 0.66258600  | -0.51658900 | 4.66076300  |
| H | 0.12514500  | -0.75972100 | 2.99544700  |
| H | 0.82798600  | -2.11103000 | 3.90963200  |
| H | 4.38116200  | -0.80651400 | 3.92315400  |
| H | 3.19804300  | -0.70455800 | 5.23490000  |
| H | 3.36000900  | -2.19919400 | 4.32375200  |
| C | -2.11794000 | -0.39045700 | -2.16000100 |
| C | -0.82366300 | -1.08112300 | -1.66559900 |
| H | -0.04803500 | -0.27252900 | -1.82798100 |
| H | -0.55648100 | -1.87575100 | -2.37283500 |
| C | -2.45463400 | 0.87363500  | -1.34637700 |
| H | -2.39398900 | 0.64684800  | -0.27463200 |
| H | -1.68345300 | 1.63360300  | -1.54168800 |
| C | -3.84084400 | 1.47196400  | -1.63058600 |
| H | -3.91147300 | 1.77959800  | -2.68107600 |
| H | -4.60645400 | 0.69615800  | -1.48718500 |
| C | -4.16582600 | 2.67542000  | -0.73576100 |
| H | -4.11571600 | 2.37049100  | 0.31903500  |
| H | -3.39989900 | 3.45123800  | -0.86646400 |
| C | -5.55029500 | 3.28667500  | -1.02306600 |
| H | -5.59744600 | 3.61918300  | -2.06765400 |
| H | -6.31077400 | 2.49953000  | -0.91030300 |
| C | -5.88154600 | 4.43655600  | -0.11044100 |
| H | -5.92446900 | 4.20122900  | 0.95424900  |
| C | -6.11045100 | 5.68853800  | -0.50667200 |

|   |             |             |             |
|---|-------------|-------------|-------------|
| H | -6.08250100 | 5.96882800  | -1.55736000 |
| H | -6.34426800 | 6.47847700  | 0.20068600  |
| C | -2.00111800 | -0.10121000 | -3.66482400 |
| H | -1.20741800 | 0.62993100  | -3.86592200 |
| H | -1.77609700 | -1.01169000 | -4.23069400 |
| H | -2.93097400 | 0.30823700  | -4.06553600 |
| H | -2.92587700 | -1.12064200 | -2.02249800 |
| C | -0.77501700 | -1.68352200 | -0.23026400 |
| H | -0.92433800 | -0.88145100 | 0.50261800  |
| C | 0.61592100  | -2.33979500 | 0.01771600  |
| H | 0.78493100  | -2.52321500 | 1.08288000  |
| H | 0.70314000  | -3.28218000 | -0.52800200 |
| C | -1.89219700 | -2.75260600 | -0.00740200 |
| H | -2.10414800 | -3.25351800 | -0.96209300 |
| H | -1.48723000 | -3.52842600 | 0.65186600  |
| C | -3.19337500 | -2.23290500 | 0.62436000  |
| H | -3.65280600 | -1.46050300 | -0.00353600 |
| H | -2.95429100 | -1.74678400 | 1.58047600  |
| C | -4.21220900 | -3.35521700 | 0.86670200  |
| H | -4.45378100 | -3.84154500 | -0.08861700 |
| H | -3.76333700 | -4.13127400 | 1.49997900  |
| C | -5.51185900 | -2.85721400 | 1.52759200  |
| H | -5.94599900 | -2.06725700 | 0.89617100  |
| H | -5.27973800 | -2.39296000 | 2.49435600  |
| C | -6.52350300 | -3.95427800 | 1.72286000  |
| H | -6.87283300 | -4.44637500 | 0.81388100  |
| C | -6.99749000 | -4.35734800 | 2.90161400  |
| H | -6.67936500 | -3.89489500 | 3.83339000  |
| H | -7.72608900 | -5.15840100 | 2.98091400  |

**2C<sub>12b</sub>, -1655.777264**

|    |             |             |             |
|----|-------------|-------------|-------------|
| Ti | -0.75542800 | -1.33793900 | -0.28589600 |
| O  | -1.66100500 | 0.06203800  | 0.36125800  |
| C  | -2.26069000 | -2.74149900 | -1.46229600 |
| C  | -1.00624400 | -3.41642200 | -1.57879700 |
| C  | -0.58528000 | -3.78890900 | -0.27279500 |
| C  | -1.58903900 | -3.36310000 | 0.65857400  |
| C  | -2.63136200 | -2.72682200 | -0.07609000 |
| C  | -2.61018100 | 0.88592500  | 0.93090200  |
| C  | -3.51239000 | 1.58757200  | 0.09966300  |
| C  | -3.59813700 | 1.86103200  | 2.90119700  |
| C  | -2.64172400 | 1.00925400  | 2.34237100  |
| C  | -3.11303000 | -2.28400600 | -2.61026300 |
| C  | -0.32258700 | -3.82113000 | -2.85129300 |
| C  | 0.59982500  | -4.66710000 | 0.01962100  |

|   |             |             |             |
|---|-------------|-------------|-------------|
| C | -1.61270900 | -3.66355500 | 2.13174700  |
| C | -3.49916700 | 1.49559800  | -1.42069200 |
| C | -3.03717500 | 2.82856800  | -2.04443700 |
| C | -4.87267800 | 1.09267200  | -1.99415700 |
| C | -1.63391800 | 0.28973500  | 3.22805000  |
| C | -2.17736000 | -0.09122500 | 4.61543100  |
| C | -0.34516000 | 1.12891600  | 3.36438100  |
| C | -4.44634900 | 2.42581500  | 0.72210100  |
| C | -4.49592800 | 2.56683100  | 2.10370900  |
| C | -3.94003400 | -2.25406600 | 0.48831300  |
| H | -2.77743000 | 0.72454300  | -1.70673100 |
| H | -1.38026100 | -0.65085300 | 2.72473200  |
| H | 0.38926800  | -5.69023300 | -0.31504000 |
| H | 1.50368400  | -4.34254100 | -0.50548600 |
| H | 0.82231700  | -4.72624100 | 1.08739800  |
| H | -2.07094000 | -4.64513700 | 2.30495500  |
| H | -0.61210600 | -3.69741200 | 2.57077400  |
| H | -2.20186400 | -2.93264500 | 2.69024300  |
| H | -3.83830900 | -1.87633600 | 1.50808600  |
| H | -4.38293800 | -1.45734200 | -0.11113200 |
| H | -4.65572400 | -3.08485100 | 0.51364000  |
| H | -3.67920900 | -3.13298000 | -3.01332200 |
| H | -3.83662300 | -1.52668800 | -2.30706800 |
| H | -2.51753900 | -1.87229300 | -3.42894500 |
| H | -0.50781400 | -4.88467500 | -3.04642000 |
| H | -0.69650500 | -3.26850100 | -3.71507200 |
| H | 0.76182800  | -3.68416700 | -2.80542000 |
| H | -5.14800400 | 2.97935600  | 0.10610100  |
| H | -5.23032700 | 3.22310500  | 2.55990300  |
| H | -3.64315700 | 1.97565600  | 3.97841300  |
| H | -3.12105700 | -0.64095800 | 4.54510400  |
| H | -1.45289800 | -0.72247500 | 5.13982700  |
| H | -2.34674700 | 0.78763300  | 5.24477700  |
| H | 0.41535100  | 0.59585000  | 3.94616000  |
| H | 0.07632600  | 1.38327000  | 2.38627500  |
| H | -0.55998300 | 2.07006500  | 3.88032400  |
| H | -3.74841800 | 3.63105900  | -1.82388300 |
| H | -2.06245200 | 3.13522100  | -1.65582000 |
| H | -2.96274000 | 2.74165500  | -3.13368900 |
| H | -5.25240900 | 0.16839700  | -1.54679700 |
| H | -5.62439300 | 1.86835100  | -1.81911500 |
| H | -4.80449500 | 0.94602500  | -3.07712900 |
| C | 0.22417000  | 0.79083500  | -2.51421900 |
| C | 0.06503700  | -0.69112100 | -2.10415800 |

|   |             |             |             |
|---|-------------|-------------|-------------|
| H | 1.05885200  | -1.13624600 | -1.86667300 |
| H | -0.29292000 | -1.24697500 | -2.97152800 |
| C | 0.93143800  | 1.65677300  | -1.45321700 |
| H | 0.37288700  | 1.58476000  | -0.50975200 |
| H | 1.93120600  | 1.23735900  | -1.26626200 |
| C | 1.09465900  | 3.14443500  | -1.80169400 |
| H | 1.75971100  | 3.25466600  | -2.66650200 |
| H | 0.12540200  | 3.56097900  | -2.10749000 |
| C | 1.65529800  | 3.96806800  | -0.63463400 |
| H | 0.97566500  | 3.89183500  | 0.22645500  |
| H | 2.61379500  | 3.54161200  | -0.30765400 |
| C | 1.86735100  | 5.45351600  | -0.98326100 |
| H | 2.56965000  | 5.53805700  | -1.82188100 |
| H | 0.91096600  | 5.87057200  | -1.33236700 |
| C | 2.37027000  | 6.26179800  | 0.18221800  |
| H | 1.71191600  | 6.30281800  | 1.05169100  |
| C | 3.53752400  | 6.90435100  | 0.22350500  |
| H | 4.22367300  | 6.89578100  | -0.62051800 |
| H | 3.84777300  | 7.47169900  | 1.09583100  |
| C | 0.94487400  | 0.85785600  | -3.87724800 |
| H | 1.97694200  | 0.49527600  | -3.79499600 |
| H | 0.43433300  | 0.24078100  | -4.62354500 |
| H | 0.97913000  | 1.87971600  | -4.26529500 |
| H | -0.78363800 | 1.20052200  | -2.65945700 |
| C | 2.06563200  | -0.74352700 | 0.81405100  |
| H | 1.91145700  | 0.32970000  | 0.91989400  |
| C | 1.16688600  | -1.58174000 | 1.38215900  |
| H | 0.41221200  | -1.19127600 | 2.06227000  |
| H | 1.35184300  | -2.64929500 | 1.39784100  |
| C | 3.31335300  | -1.16305400 | 0.10829900  |
| H | 3.31681400  | -2.24688500 | -0.05363000 |
| H | 3.36198600  | -0.67785200 | -0.87501700 |
| C | 4.56933600  | -0.74785100 | 0.91699400  |
| H | 4.53097000  | -1.21910500 | 1.90688400  |
| H | 4.55089500  | 0.33673800  | 1.08534600  |
| C | 5.87081000  | -1.13842300 | 0.20443300  |
| H | 5.88448400  | -2.22124400 | 0.02598300  |
| H | 5.90161200  | -0.66110900 | -0.78451500 |
| C | 7.12798500  | -0.74458300 | 1.00333200  |
| H | 7.11191200  | -1.23771700 | 1.98320300  |
| H | 7.09756400  | 0.33823200  | 1.19491100  |
| C | 8.40278400  | -1.09188100 | 0.28197800  |
| H | 8.55488400  | -0.59936400 | -0.67950200 |
| C | 9.32506100  | -1.94417300 | 0.72855800  |

|                                                  |             |             |             |
|--------------------------------------------------|-------------|-------------|-------------|
| H                                                | 9.21692200  | -2.45466200 | 1.68296600  |
| H                                                | 10.22722500 | -2.15705000 | 0.16330600  |
| <b>2TS<sub>12b</sub>, -1655.7621438, i247.25</b> |             |             |             |
| Ti                                               | 0.26834500  | -1.55144700 | -0.02095300 |
| O                                                | -1.16488400 | -0.74700800 | 0.71920900  |
| C                                                | -0.36260500 | -3.39813000 | -1.35112600 |
| C                                                | 1.06500400  | -3.33663600 | -1.52860800 |
| C                                                | 1.67981000  | -3.60823800 | -0.28582500 |
| C                                                | 0.64209800  | -3.82116700 | 0.68430400  |
| C                                                | -0.61507700 | -3.73997800 | 0.01318000  |
| C                                                | -2.28542100 | -0.02805400 | 1.08613100  |
| C                                                | -3.49779000 | -0.17790700 | 0.37188300  |
| C                                                | -3.28937000 | 1.65682900  | 2.49411400  |
| C                                                | -2.17442400 | 0.87833100  | 2.17259400  |
| C                                                | -1.34827800 | -3.37609700 | -2.48998800 |
| C                                                | 1.76593700  | -3.20966200 | -2.85170900 |
| C                                                | 3.15440600  | -3.77688400 | -0.06220600 |
| C                                                | 0.81639000  | -4.28876100 | 2.10170200  |
| C                                                | -3.70390700 | -1.20414400 | -0.73369200 |
| C                                                | -4.00242200 | -0.56330700 | -2.10341800 |
| C                                                | -4.82777300 | -2.19490900 | -0.36210500 |
| C                                                | -0.90586700 | 0.96635100  | 3.00962300  |
| C                                                | -0.91590200 | -0.12075800 | 4.10677200  |
| C                                                | -0.65211800 | 2.35056100  | 3.62925700  |
| C                                                | -4.57657400 | 0.63729200  | 0.74019200  |
| C                                                | -4.48139200 | 1.55197200  | 1.78117600  |
| C                                                | -1.93087800 | -4.08579100 | 0.65212900  |
| H                                                | -2.77631400 | -1.77124700 | -0.82814000 |
| H                                                | -0.06522500 | 0.76331900  | 2.33997400  |
| H                                                | 3.45500300  | -4.79702300 | -0.33186500 |
| H                                                | 3.74946700  | -3.09560900 | -0.67645000 |
| H                                                | 3.44102100  | -3.63119700 | 0.98174100  |
| H                                                | 0.73154300  | -5.38170000 | 2.14673200  |
| H                                                | 1.79405900  | -4.02841200 | 2.51261000  |
| H                                                | 0.05023500  | -3.87809200 | 2.76511200  |
| H                                                | -2.16922300 | -3.43797500 | 1.50123300  |
| H                                                | -2.75569100 | -4.02226400 | -0.05647000 |
| H                                                | -1.89860000 | -5.11558800 | 1.02574700  |
| H                                                | -1.16219900 | -4.22911100 | -3.15335000 |
| H                                                | -2.37823500 | -3.45537200 | -2.14210200 |
| H                                                | -1.27169600 | -2.47216500 | -3.10231100 |
| H                                                | 1.91009700  | -4.20422500 | -3.29217400 |
| H                                                | 1.18979500  | -2.62424700 | -3.57214800 |
| H                                                | 2.75794100  | -2.75790600 | -2.76080900 |

|   |             |             |             |
|---|-------------|-------------|-------------|
| H | -5.51319100 | 0.54247000  | 0.19945500  |
| H | -5.33277300 | 2.17091300  | 2.04612400  |
| H | -3.22517900 | 2.35898900  | 3.31763500  |
| H | -1.05354500 | -1.12200000 | 3.68472700  |
| H | 0.01862600  | -0.11043800 | 4.67888700  |
| H | -1.73870600 | 0.05355300  | 4.80751400  |
| H | 0.33754200  | 2.37195800  | 4.09661400  |
| H | -0.69037500 | 3.14525700  | 2.87782700  |
| H | -1.37745000 | 2.59057600  | 4.41268500  |
| H | -4.91342600 | 0.04245700  | -2.06995100 |
| H | -3.18859900 | 0.08511100  | -2.43938800 |
| H | -4.15279600 | -1.33838000 | -2.86258900 |
| H | -4.66311700 | -2.64671800 | 0.61991000  |
| H | -5.80164000 | -1.69663800 | -0.33602600 |
| H | -4.89691600 | -2.99728100 | -1.10544100 |
| C | 0.11223400  | 0.45409400  | -1.84746000 |
| C | 1.41996300  | -0.08481100 | -1.23093200 |
| H | 2.13859800  | 0.72701200  | -1.21284600 |
| H | 1.88337400  | -0.89134400 | -1.80958300 |
| C | -0.20455900 | 1.83862600  | -1.23671000 |
| H | -0.26981200 | 1.73642900  | -0.14703700 |
| H | 0.66171900  | 2.48673500  | -1.43394500 |
| C | -1.47363100 | 2.54227800  | -1.73351500 |
| H | -1.42014500 | 2.70137100  | -2.81773000 |
| H | -2.34532400 | 1.90343400  | -1.54976500 |
| C | -1.69547500 | 3.89489000  | -1.04165500 |
| H | -1.76286100 | 3.73846400  | 0.04384300  |
| H | -0.82646200 | 4.54486700  | -1.20847600 |
| C | -2.96509400 | 4.61885200  | -1.52774800 |
| H | -2.89943200 | 4.79588700  | -2.60862700 |
| H | -3.82680200 | 3.95322600  | -1.36909500 |
| C | -3.20231500 | 5.92293000  | -0.81511000 |
| H | -3.34192700 | 5.85524000  | 0.26510300  |
| C | -3.24135500 | 7.12040200  | -1.39928600 |
| H | -3.10922700 | 7.23639300  | -2.47271300 |
| H | -3.41369000 | 8.02900100  | -0.83032700 |
| C | 0.25852900  | 0.49680500  | -3.38529100 |
| H | 1.05456300  | 1.19190000  | -3.67178600 |
| H | 0.50835700  | -0.48520800 | -3.79579200 |
| H | -0.66922600 | 0.83082200  | -3.85734700 |
| H | -0.75633800 | -0.21291400 | -1.65368500 |
| C | 2.19219800  | -0.09278400 | 0.89170100  |
| H | 1.70566400  | 0.86943100  | 1.02921300  |
| C | 1.67251600  | -1.18320500 | 1.62303400  |

|   |            |             |             |
|---|------------|-------------|-------------|
| H | 0.93242900 | -0.98416100 | 2.39301200  |
| H | 2.35493400 | -1.99208300 | 1.84964000  |
| C | 3.66862100 | -0.03032100 | 0.51820700  |
| H | 4.22375000 | -0.56061400 | 1.30152800  |
| H | 3.86733800 | -0.58298800 | -0.40771000 |
| C | 4.21429800 | 1.40142300  | 0.40039200  |
| H | 4.03046800 | 1.93198200  | 1.34416500  |
| H | 3.66295500 | 1.95623000  | -0.37206200 |
| C | 5.71305600 | 1.43851800  | 0.07612200  |
| H | 6.26987900 | 0.88442800  | 0.84265400  |
| H | 5.89375900 | 0.91524700  | -0.87337800 |
| C | 6.27442500 | 2.87011400  | -0.01488500 |
| H | 6.12100300 | 3.38707600  | 0.94055500  |
| H | 5.69769300 | 3.42628300  | -0.76928900 |
| C | 7.73493200 | 2.89988200  | -0.37783500 |
| H | 7.99391600 | 2.46752000  | -1.34551300 |
| C | 8.70316600 | 3.39875200  | 0.39026000  |
| H | 8.49130800 | 3.84211000  | 1.36066500  |
| H | 9.74244100 | 3.39097800  | 0.07630400  |

**2P<sub>12b</sub>, -1655.7963315**

|    |             |             |             |
|----|-------------|-------------|-------------|
| Ti | -0.58462500 | -0.93724800 | -1.04354200 |
| O  | -0.33579000 | -1.15217900 | 0.71404400  |
| C  | -2.60789400 | -2.04299500 | -1.32226500 |
| C  | -2.48731200 | -1.17856600 | -2.45629800 |
| C  | -1.38280900 | -1.62860700 | -3.24534400 |
| C  | -0.79384300 | -2.74523200 | -2.58410300 |
| C  | -1.55549900 | -3.00499000 | -1.39055100 |
| C  | -0.43933800 | -1.63883600 | 1.99799700  |
| C  | -1.42123000 | -1.09798600 | 2.85841600  |
| C  | 0.31339600  | -3.14532300 | 3.71308600  |
| C  | 0.45599400  | -2.65393200 | 2.41146800  |
| C  | -3.70712200 | -2.01886200 | -0.29860800 |
| C  | -3.44044600 | -0.06633000 | -2.80012800 |
| C  | -0.96320400 | -1.09907600 | -4.58573000 |
| C  | 0.30539400  | -3.60805400 | -3.12980300 |
| C  | -2.28719500 | 0.08842800  | 2.45640200  |
| C  | -1.64584700 | 1.39593500  | 2.96722000  |
| C  | -3.74520600 | -0.02071200 | 2.93660700  |
| C  | 1.57935800  | -3.14784200 | 1.50899200  |
| C  | 1.90843400  | -4.63990200 | 1.68649300  |
| C  | 2.84281500  | -2.28627100 | 1.71923800  |
| C  | -1.50779800 | -1.62800800 | 4.15073800  |
| C  | -0.66023800 | -2.64700300 | 4.57535700  |
| C  | -1.39084900 | -4.18428800 | -0.47512300 |



|   |             |             |             |
|---|-------------|-------------|-------------|
| H | -2.30862100 | 0.13512300  | 1.36016800  |
| H | 1.25503900  | -3.00950800 | 0.47194000  |
| H | -1.29848200 | -1.78225400 | -5.37553800 |
| H | -1.40127800 | -0.12250700 | -4.79769500 |
| H | 0.12321700  | -1.01298000 | -4.67878800 |
| H | -0.12437100 | -4.41595200 | -3.73483500 |
| H | 0.98643300  | -3.04742900 | -3.77353300 |
| H | 0.89633200  | -4.07485800 | -2.33827000 |
| H | -0.38586900 | -4.60652600 | -0.53061700 |
| H | -1.59307200 | -3.93150300 | 0.56823100  |
| H | -2.09338200 | -4.97507300 | -0.76565800 |
| H | -4.53139700 | -2.66605900 | -0.62332300 |
| H | -3.36732500 | -2.38488700 | 0.67258500  |
| H | -4.12130200 | -1.01753700 | -0.15800400 |
| H | -4.33353400 | -0.47725400 | -3.28649300 |
| H | -3.78216700 | 0.47556600  | -1.91336400 |
| H | -2.99949700 | 0.65767700  | -3.48768100 |
| H | -2.24758200 | -1.23175000 | 4.83815500  |
| H | -0.75037400 | -3.04523900 | 5.58110300  |
| H | 0.97869400  | -3.92799200 | 4.06063100  |
| H | 1.01667400  | -5.26825500 | 1.59857300  |
| H | 2.62661700  | -4.95668300 | 0.92343200  |
| H | 2.36789000  | -4.84545600 | 2.65813800  |
| H | 3.64374500  | -2.59913700 | 1.04030800  |
| H | 2.63803300  | -1.22532300 | 1.54728600  |
| H | 3.21268200  | -2.39112100 | 2.74444700  |
| H | -1.57742800 | 1.38759600  | 4.05978200  |
| H | -0.63285600 | 1.52700600  | 2.57335900  |
| H | -2.24640200 | 2.26295100  | 2.67562000  |
| H | -4.20541400 | -0.96688400 | 2.63717600  |
| H | -3.82117100 | 0.05675300  | 4.02532500  |
| H | -4.34092400 | 0.79679000  | 2.51755200  |
| C | -0.09476000 | 1.99469200  | -2.07509900 |
| C | 1.40294300  | 1.63711500  | -2.18443600 |
| H | 1.96664200  | 2.55566600  | -1.98954200 |
| H | 1.63416000  | 1.35290100  | -3.21892900 |
| C | -0.38178200 | 2.92421200  | -0.87817100 |
| H | 0.13555600  | 2.55102000  | 0.01511900  |
| H | 0.09012800  | 3.88767300  | -1.11481900 |
| C | -1.86118500 | 3.16042200  | -0.54147000 |
| H | -2.42770800 | 3.38953600  | -1.45202200 |
| H | -2.29854200 | 2.23499600  | -0.13347000 |
| C | -2.06782500 | 4.30614200  | 0.45929000  |
| H | -1.48347400 | 4.11349300  | 1.36863000  |

|                                       |             |             |             |
|---------------------------------------|-------------|-------------|-------------|
| H                                     | -1.66728300 | 5.23357000  | 0.03099900  |
| C                                     | -3.54553800 | 4.52674600  | 0.83287200  |
| H                                     | -4.12803400 | 4.73472100  | -0.07367100 |
| H                                     | -3.94671600 | 3.59086000  | 1.25311500  |
| C                                     | -3.73824300 | 5.64291500  | 1.82427600  |
| H                                     | -3.24221800 | 5.51522400  | 2.78764500  |
| C                                     | -4.44613300 | 6.74982200  | 1.60087800  |
| H                                     | -4.95756800 | 6.92009600  | 0.65609500  |
| H                                     | -4.54637600 | 7.52539800  | 2.35393200  |
| C                                     | -0.60810300 | 2.58367400  | -3.39678900 |
| H                                     | -0.07203100 | 3.51677000  | -3.60400600 |
| H                                     | -0.42107300 | 1.90704800  | -4.23458200 |
| H                                     | -1.67509800 | 2.81611700  | -3.37179300 |
| H                                     | -0.68733800 | 1.03886400  | -1.91872500 |
| C                                     | 1.89662600  | 0.50568100  | -1.26262100 |
| H                                     | 1.54022100  | 0.70315400  | -0.23689000 |
| C                                     | 1.36070100  | -0.86381700 | -1.75527900 |
| H                                     | 1.88606400  | -1.69187300 | -1.26202000 |
| H                                     | 1.50086300  | -0.97314600 | -2.83414500 |
| C                                     | 3.44733200  | 0.46472700  | -1.18138300 |
| H                                     | 3.73911300  | -0.45499600 | -0.66123300 |
| H                                     | 3.84708100  | 0.37907500  | -2.20135900 |
| C                                     | 4.09653800  | 1.65697600  | -0.46277000 |
| H                                     | 3.66071100  | 1.75548100  | 0.54193000  |
| H                                     | 3.87098300  | 2.59386600  | -0.98845500 |
| C                                     | 5.62009400  | 1.51304500  | -0.34144300 |
| H                                     | 5.86206300  | 0.58619700  | 0.19459500  |
| H                                     | 6.05709300  | 1.40990800  | -1.34419300 |
| C                                     | 6.28301100  | 2.69985600  | 0.38343600  |
| H                                     | 5.86483500  | 2.79604600  | 1.39350000  |
| H                                     | 6.02519600  | 3.62585800  | -0.15233100 |
| C                                     | 7.78007500  | 2.57046600  | 0.46624500  |
| H                                     | 8.30681500  | 2.52601700  | -0.48825100 |
| C                                     | 8.48147600  | 2.49850400  | 1.59744500  |
| H                                     | 7.99935300  | 2.54093500  | 2.57168900  |
| H                                     | 9.56302800  | 2.40276800  | 1.59449000  |
| <b>2C<sub>21f</sub>, -1655.775165</b> |             |             |             |
| Ti                                    | 0.87312400  | -1.24680500 | -0.73638200 |
| O                                     | 1.12332600  | -0.20617500 | 0.70127800  |
| C                                     | 0.27740000  | -3.53514100 | -1.38338400 |
| C                                     | 1.57060600  | -3.30097100 | -1.92674200 |
| C                                     | 2.45941200  | -3.02296100 | -0.84220400 |
| C                                     | 1.71417800  | -3.12106000 | 0.38104300  |
| C                                     | 0.36418500  | -3.42262900 | 0.04255200  |

|   |             |             |             |
|---|-------------|-------------|-------------|
| C | 1.40957200  | 0.28287600  | 1.95911300  |
| C | 0.38312200  | 0.30574100  | 2.93487300  |
| C | 2.96141500  | 1.24055100  | 3.53359200  |
| C | 2.71148000  | 0.76349800  | 2.24172000  |
| C | -0.90887900 | -4.04161600 | -2.15401400 |
| C | 1.94771000  | -3.47214600 | -3.36963700 |
| C | 3.94505200  | -2.83546000 | -0.95376100 |
| C | 2.27834900  | -3.06499000 | 1.77125900  |
| C | -1.04892500 | -0.11296700 | 2.63327600  |
| C | -1.93880500 | 1.13539000  | 2.45229200  |
| C | -1.64291500 | -1.04774000 | 3.70398100  |
| C | 3.83315400  | 0.81546800  | 1.21213200  |
| C | 5.08084000  | 0.02869100  | 1.66157400  |
| C | 4.22005200  | 2.27413800  | 0.88975700  |
| C | 0.69611200  | 0.80323500  | 4.20387900  |
| C | 1.97348600  | 1.26065100  | 4.51171400  |
| C | -0.74613100 | -3.71560900 | 1.01154300  |
| H | -1.04220400 | -0.66474200 | 1.68758100  |
| H | 3.46364400  | 0.35978900  | 0.29120700  |
| H | 4.44388100  | -3.81241100 | -0.93916200 |
| H | 4.22830600  | -2.33822400 | -1.88390300 |
| H | 4.34939100  | -2.25324800 | -0.12345000 |
| H | 2.54557400  | -4.07536500 | 2.10403800  |
| H | 3.18088600  | -2.45460600 | 1.82276200  |
| H | 1.56602200  | -2.65747100 | 2.49188600  |
| H | -0.58723900 | -3.22941800 | 1.97548700  |
| H | -1.72290500 | -3.40459100 | 0.63182900  |
| H | -0.80424400 | -4.79531800 | 1.19854400  |
| H | -0.85986900 | -5.13542900 | -2.22519100 |
| H | -1.85750300 | -3.79847300 | -1.66926500 |
| H | -0.93494900 | -3.66021900 | -3.17862900 |
| H | 2.03094500  | -4.53991500 | -3.60690700 |
| H | 1.20245200  | -3.04787800 | -4.04909700 |
| H | 2.91266200  | -3.01718700 | -3.60024400 |
| H | -0.07756800 | 0.83717400  | 4.96409300  |
| H | 2.19433000  | 1.63830600  | 5.50502700  |
| H | 3.95325600  | 1.61094900  | 3.77297900  |
| H | 4.84604700  | -1.01051600 | 1.91231500  |
| H | 5.83552900  | 0.02663000  | 0.86808700  |
| H | 5.54131900  | 0.47842600  | 2.54662200  |
| H | 4.96140500  | 2.30570500  | 0.08425700  |
| H | 3.35259600  | 2.86470700  | 0.58246000  |
| H | 4.65974500  | 2.76665800  | 1.76297600  |
| H | -1.98556600 | 1.71298800  | 3.38079200  |

|   |             |             |             |
|---|-------------|-------------|-------------|
| H | -1.54607600 | 1.80256100  | 1.67769100  |
| H | -2.96505000 | 0.85590900  | 2.18784300  |
| H | -1.00271900 | -1.91630500 | 3.88681500  |
| H | -1.77917300 | -0.53437900 | 4.66032400  |
| H | -2.62866100 | -1.40956700 | 3.39230100  |
| C | 1.67407200  | 1.06444200  | -2.80984400 |
| C | 2.09352800  | -0.29736800 | -2.19256600 |
| H | 3.02491800  | -0.16278600 | -1.62092500 |
| H | 2.33887200  | -0.97801900 | -3.01098900 |
| C | 1.22394600  | 2.11893100  | -1.77803100 |
| H | 0.43440300  | 1.70014900  | -1.13695100 |
| H | 2.06080300  | 2.32860300  | -1.10072900 |
| C | 0.70447400  | 3.43642900  | -2.37244300 |
| H | 1.51125400  | 3.94825900  | -2.91016800 |
| H | -0.07180600 | 3.22114400  | -3.12159600 |
| C | 0.13515100  | 4.38697800  | -1.31081000 |
| H | -0.69493600 | 3.89316300  | -0.78367400 |
| H | 0.89910600  | 4.59141900  | -0.54917600 |
| C | -0.35965900 | 5.72422900  | -1.89373800 |
| H | 0.47255500  | 6.23877100  | -2.38984500 |
| H | -1.10559000 | 5.51166900  | -2.67443400 |
| C | -0.96605000 | 6.62800500  | -0.85446100 |
| H | -1.84739900 | 6.23883000  | -0.34145700 |
| C | -0.50467000 | 7.83367100  | -0.52231100 |
| H | 0.36813000  | 8.26416600  | -1.00806300 |
| H | -0.98479200 | 8.44001400  | 0.23984600  |
| C | 2.83177500  | 1.58450000  | -3.68705700 |
| H | 3.69780700  | 1.84901100  | -3.06924100 |
| H | 3.15233200  | 0.82396300  | -4.40588300 |
| H | 2.53950800  | 2.47194300  | -4.25580900 |
| H | 0.82925900  | 0.87894200  | -3.49343800 |
| C | -1.24419500 | -0.68027300 | -1.93834700 |
| H | -0.52706500 | 0.01450100  | -2.37323700 |
| C | -2.02311800 | -0.28890400 | -0.90143500 |
| H | -1.79322800 | 0.65620200  | -0.40898900 |
| H | -1.50249200 | -1.55469500 | -2.52600700 |
| C | -3.24622700 | -0.99857900 | -0.42045400 |
| H | -3.34012900 | -1.97549000 | -0.90706400 |
| H | -3.17667600 | -1.16678300 | 0.66156400  |
| C | -4.51568100 | -0.15259900 | -0.69949100 |
| H | -4.59720600 | 0.02778200  | -1.77845200 |
| H | -4.40688000 | 0.83126000  | -0.22513300 |
| C | -5.79049300 | -0.83529400 | -0.18672500 |
| H | -5.89259200 | -1.82125300 | -0.66014100 |

|                                                 |              |             |             |
|-------------------------------------------------|--------------|-------------|-------------|
| H                                               | -5.70348000  | -1.01786900 | 0.89216900  |
| C                                               | -7.05987000  | -0.00476900 | -0.45664700 |
| H                                               | -6.97218600  | 0.97286000  | 0.03342300  |
| C                                               | -8.31251500  | -0.69600900 | 0.01159800  |
| H                                               | -8.53552300  | -1.65156800 | -0.46516200 |
| C                                               | -9.13653700  | -0.22969600 | 0.94963600  |
| H                                               | -10.02780500 | -0.77308300 | 1.24806800  |
| H                                               | -8.95588200  | 0.72006300  | 1.44814100  |
| H                                               | -7.12928600  | 0.18953300  | -1.53712700 |
| <b>2TS<sub>216</sub>, -1655.760189, i234.28</b> |              |             |             |
| Ti                                              | -0.34851500  | -1.34135300 | -0.53148600 |
| O                                               | 0.72544100   | -0.61350500 | 0.69787300  |
| C                                               | -2.28810300  | -2.88092000 | -0.97433600 |
| C                                               | -1.09738300  | -3.46660800 | -1.48434600 |
| C                                               | -0.19624900  | -3.67411300 | -0.38778000 |
| C                                               | -0.83127000  | -3.19881800 | 0.79910400  |
| C                                               | -2.12084600  | -2.69334700 | 0.43457200  |
| C                                               | 1.44253400   | -0.24117600 | 1.81379700  |
| C                                               | 0.80196100   | 0.56130100  | 2.78838800  |
| C                                               | 3.48610500   | -0.21536900 | 3.08353800  |
| C                                               | 2.78932600   | -0.65178300 | 1.95042900  |
| C                                               | -3.55108900  | -2.71410600 | -1.77343100 |
| C                                               | -0.90636500  | -3.97086700 | -2.88569200 |
| C                                               | 1.11210600   | -4.41131900 | -0.46589400 |
| C                                               | -0.31902300  | -3.32856700 | 2.20529100  |
| C                                               | -0.64489200  | 1.01884500  | 2.65565500  |
| C                                               | -0.71437000  | 2.50769700  | 2.25784900  |
| C                                               | -1.47063900  | 0.75502600  | 3.92943000  |
| C                                               | 3.50546900   | -1.54452600 | 0.94339900  |
| C                                               | 3.95120600   | -2.87395700 | 1.58747700  |
| C                                               | 4.72149900   | -0.83835400 | 0.30948000  |
| C                                               | 1.55498000   | 0.96534400  | 3.89526500  |
| C                                               | 2.88588400   | 0.58790200  | 4.04720200  |
| C                                               | -3.17103700  | -2.28202600 | 1.42913600  |
| H                                               | -1.10618200  | 0.43789000  | 1.85114300  |
| H                                               | 2.80004800   | -1.78165100 | 0.13984800  |
| H                                               | 0.93245600   | -5.49155500 | -0.39977300 |
| H                                               | 1.63552100   | -4.23190000 | -1.40947000 |
| H                                               | 1.78541800   | -4.14462900 | 0.34944400  |
| H                                               | -0.70980600  | -4.24542700 | 2.66355000  |
| H                                               | 0.77035900   | -3.38156700 | 2.24220500  |
| H                                               | -0.62911300  | -2.49048300 | 2.83398000  |
| H                                               | -2.79020000  | -1.57292700 | 2.17019300  |
| H                                               | -4.04373500  | -1.83564900 | 0.95247800  |

|   |             |             |             |
|---|-------------|-------------|-------------|
| H | -3.51572900 | -3.16468400 | 1.98166800  |
| H | -3.90727700 | -3.69893800 | -2.09836600 |
| H | -4.35330800 | -2.26034200 | -1.19068800 |
| H | -3.41050900 | -2.11730600 | -2.68061400 |
| H | -1.27956900 | -4.99910500 | -2.96952100 |
| H | -1.45368600 | -3.37140800 | -3.61879800 |
| H | 0.14627100  | -3.99161000 | -3.18080400 |
| H | 1.08960000  | 1.58923600  | 4.65169300  |
| H | 3.45086900  | 0.91561200  | 4.91407600  |
| H | 4.52223700  | -0.51319800 | 3.21103000  |
| H | 3.11892500  | -3.39652000 | 2.06949000  |
| H | 4.38764200  | -3.53989900 | 0.83550400  |
| H | 4.71213300  | -2.70449900 | 2.35546700  |
| H | 5.17640600  | -1.47368100 | -0.45817000 |
| H | 4.44742100  | 0.11419100  | -0.15190400 |
| H | 5.49086700  | -0.62950100 | 1.05932200  |
| H | -0.28157400 | 3.13971600  | 3.04005800  |
| H | -0.15747500 | 2.70525500  | 1.33582000  |
| H | -1.75271500 | 2.82472000  | 2.11083000  |
| H | -1.42213700 | -0.29619900 | 4.23177500  |
| H | -1.12244900 | 1.35658000  | 4.77433800  |
| H | -2.52110500 | 1.01499100  | 3.76088900  |
| C | 1.61834600  | -0.04495700 | -2.97728100 |
| C | 0.58136000  | -1.04294300 | -2.44182000 |
| H | 1.12240700  | -1.77358900 | -1.75239000 |
| H | 0.19261400  | -1.65236300 | -3.25819000 |
| C | 2.04576600  | 1.02992300  | -1.95894900 |
| H | 1.15071500  | 1.52414500  | -1.55749500 |
| H | 2.52229300  | 0.54469000  | -1.09990800 |
| C | 2.97830800  | 2.11353500  | -2.52075900 |
| H | 3.93746700  | 1.66966000  | -2.81446400 |
| H | 2.54154500  | 2.53360900  | -3.43825200 |
| C | 3.23964000  | 3.24636100  | -1.51881500 |
| H | 2.28458300  | 3.71450000  | -1.24050100 |
| H | 3.65736600  | 2.83193000  | -0.59167200 |
| C | 4.19574100  | 4.32604600  | -2.06005200 |
| H | 5.16157000  | 3.87049200  | -2.31208000 |
| H | 3.78136800  | 4.72171000  | -2.99944100 |
| C | 4.40744600  | 5.45753000  | -1.09067200 |
| H | 3.51522900  | 6.02425300  | -0.81920100 |
| C | 5.57867000  | 5.79649400  | -0.55199600 |
| H | 6.49487600  | 5.26341900  | -0.79631200 |
| H | 5.66949100  | 6.62442800  | 0.14462100  |
| C | 2.81804500  | -0.83295300 | -3.54681900 |

|                                       |             |             |             |
|---------------------------------------|-------------|-------------|-------------|
| H                                     | 3.38107700  | -1.32802300 | -2.74725400 |
| H                                     | 2.49074200  | -1.59802500 | -4.25809300 |
| H                                     | 3.50539900  | -0.16719700 | -4.07437300 |
| H                                     | 1.14481200  | 0.46187500  | -3.83109400 |
| C                                     | -1.26159900 | 0.26327400  | -2.23746900 |
| H                                     | -0.55568900 | 0.91931100  | -2.72429100 |
| C                                     | -1.67385000 | 0.50506500  | -0.92267600 |
| H                                     | -1.05077400 | 1.22101600  | -0.38189100 |
| H                                     | -1.92213800 | -0.28218400 | -2.90795700 |
| C                                     | -3.13174500 | 0.53105000  | -0.50242900 |
| H                                     | -3.70345300 | -0.22401400 | -1.04610500 |
| H                                     | -3.22719100 | 0.31035900  | 0.56484600  |
| C                                     | -3.75525700 | 1.91943800  | -0.77148700 |
| H                                     | -3.69026700 | 2.14057300  | -1.84527700 |
| H                                     | -3.16174800 | 2.69037600  | -0.26215100 |
| C                                     | -5.21535000 | 2.00794200  | -0.30954800 |
| H                                     | -5.80832600 | 1.23656800  | -0.82067800 |
| H                                     | -5.27860500 | 1.78378900  | 0.76345900  |
| C                                     | -5.84620400 | 3.38956400  | -0.57025100 |
| H                                     | -5.27348600 | 4.16166300  | -0.04144400 |
| C                                     | -7.29121500 | 3.45642400  | -0.15451400 |
| H                                     | -7.96690900 | 2.77277200  | -0.67076600 |
| C                                     | -7.78084600 | 4.26808300  | 0.78253800  |
| H                                     | -8.83515700 | 4.27105000  | 1.04180900  |
| H                                     | -7.14564200 | 4.96878400  | 1.31994300  |
| H                                     | -5.76233900 | 3.61590100  | -1.64359100 |
| <b>2P<sub>21b</sub> -1655.7932349</b> |             |             |             |
| Ti                                    | 0.03609300  | -1.57964300 | -0.45368700 |
| O                                     | 1.12597300  | -0.62895500 | 0.59298400  |
| C                                     | -1.35092500 | -3.60353500 | -0.75772000 |
| C                                     | -0.18333600 | -3.69742200 | -1.57266400 |
| C                                     | 0.96317200  | -3.69906100 | -0.71265300 |
| C                                     | 0.50523000  | -3.56436800 | 0.63137500  |
| C                                     | -0.93021600 | -3.48263900 | 0.59982400  |
| C                                     | 1.94219200  | -0.08880900 | 1.55577900  |
| C                                     | 1.34963100  | 0.38205800  | 2.75179600  |
| C                                     | 4.12221500  | 0.58556400  | 2.31067200  |
| C                                     | 3.33222400  | -0.00162500 | 1.31589700  |
| C                                     | -2.75685900 | -3.80246400 | -1.24488800 |
| C                                     | -0.17059000 | -3.94695100 | -3.05571100 |
| C                                     | 2.38516400  | -3.89456600 | -1.16021600 |
| C                                     | 1.35113300  | -3.61637700 | 1.87224200  |
| C                                     | -0.15205800 | 0.31355100  | 3.00016900  |
| C                                     | -0.80231000 | 1.69855500  | 2.80175800  |

|   |             |             |             |
|---|-------------|-------------|-------------|
| C | -0.50159300 | -0.26111900 | 4.38577100  |
| C | 3.98267300  | -0.49021500 | 0.02771200  |
| C | 5.07704100  | -1.54126800 | 0.29998200  |
| C | 4.55611900  | 0.68346700  | -0.79214700 |
| C | 2.19442200  | 0.95476200  | 3.70742200  |
| C | 3.56688800  | 1.06029100  | 3.49512300  |
| C | -1.82136200 | -3.43760600 | 1.80802900  |
| H | -0.58438700 | -0.36131800 | 2.25394700  |
| H | 3.20740100  | -0.96944700 | -0.58021800 |
| H | 2.57875900  | -4.96019400 | -1.33435000 |
| H | 2.60320100  | -3.37419600 | -2.09810400 |
| H | 3.10037900  | -3.55183800 | -0.41157000 |
| H | 1.43820100  | -4.65162300 | 2.22342700  |
| H | 2.36114800  | -3.24040500 | 1.69775900  |
| H | 0.91949800  | -3.03020800 | 2.68667900  |
| H | -1.38187600 | -2.85173300 | 2.61934300  |
| H | -2.80128000 | -3.01459000 | 1.58008200  |
| H | -1.98092400 | -4.45226200 | 2.19379900  |
| H | -2.90688000 | -4.86165800 | -1.48859800 |
| H | -3.49703000 | -3.53745300 | -0.48932800 |
| H | -2.97971500 | -3.23745700 | -2.15494900 |
| H | -0.26047800 | -5.02181200 | -3.25597700 |
| H | -1.00582200 | -3.45861800 | -3.56600600 |
| H | 0.75876000  | -3.61256100 | -3.52395000 |
| H | 1.76966400  | 1.32904600  | 4.63338200  |
| H | 4.20122100  | 1.51224400  | 4.25113500  |
| H | 5.19263600  | 0.67366000  | 2.15216900  |
| H | 4.69846200  | -2.37906100 | 0.89468900  |
| H | 5.47174300  | -1.93809000 | -0.64123600 |
| H | 5.91833500  | -1.10819600 | 0.84972100  |
| H | 4.97652900  | 0.32460300  | -1.73796700 |
| H | 3.78908400  | 1.43038100  | -1.01795100 |
| H | 5.35803500  | 1.19061500  | -0.24632500 |
| H | -0.41800200 | 2.41778700  | 3.53244900  |
| H | -0.59349800 | 2.10112600  | 1.80520200  |
| H | -1.88861900 | 1.63954700  | 2.93027100  |
| H | -0.03545300 | -1.23867200 | 4.54745200  |
| H | -0.17484800 | 0.39733000  | 5.19627300  |
| H | -1.58591400 | -0.37817000 | 4.48396800  |
| C | 0.51917000  | 0.93815500  | -3.18568000 |
| C | -0.02720900 | -0.44330700 | -2.74683300 |
| H | 0.83160000  | -0.92737000 | -2.19416900 |
| H | -0.09855700 | -1.08545100 | -3.62896200 |
| C | 0.64647000  | 1.93735900  | -2.02024200 |



|   |             |             |             |
|---|-------------|-------------|-------------|
| H | -0.32070300 | 2.01486800  | -1.50686100 |
| H | 1.35598100  | 1.54353800  | -1.27887400 |
| C | 1.07543200  | 3.35397900  | -2.43214500 |
| H | 2.08974500  | 3.33395000  | -2.84913700 |
| H | 0.41931000  | 3.71363800  | -3.23738700 |
| C | 1.03624500  | 4.34672500  | -1.26262100 |
| H | 0.01514500  | 4.39325000  | -0.85802400 |
| H | 1.67307600  | 3.98155900  | -0.44587500 |
| C | 1.49125100  | 5.76484000  | -1.65617700 |
| H | 2.52146100  | 5.73052600  | -2.03215600 |
| H | 0.86472000  | 6.11471800  | -2.49018200 |
| C | 1.40046000  | 6.74423700  | -0.51719800 |
| H | 0.40198000  | 6.90559500  | -0.10753300 |
| C | 2.43184500  | 7.40165800  | 0.01277500  |
| H | 3.44387900  | 7.27630400  | -0.36582200 |
| H | 2.30414600  | 8.09733000  | 0.83663300  |
| C | 1.83156900  | 0.74516200  | -3.95965500 |
| H | 2.63254600  | 0.39000100  | -3.29992500 |
| H | 1.71229400  | 0.01869300  | -4.77076300 |
| H | 2.16774000  | 1.68160100  | -4.40944600 |
| H | -0.23133800 | 1.33287300  | -3.88699500 |
| C | -1.44627300 | -0.43686800 | -2.06671300 |
| H | -1.90753100 | 0.48945200  | -2.42795000 |
| C | -1.63856700 | -0.42357700 | -0.50710400 |
| H | -1.16717900 | 0.48040000  | -0.09447200 |
| H | -2.03918800 | -1.25796500 | -2.47756700 |
| C | -3.08907900 | -0.48708500 | -0.05720000 |
| H | -3.59824700 | -1.33108600 | -0.53399100 |
| H | -3.10339900 | -0.68311900 | 1.02246900  |
| C | -3.89809400 | 0.79970800  | -0.32203500 |
| H | -3.93288200 | 1.00399900  | -1.40109300 |
| H | -3.38036800 | 1.65261600  | 0.13788800  |
| C | -5.33178500 | 0.72005300  | 0.21826900  |
| H | -5.84791400 | -0.13481900 | -0.24069400 |
| H | -5.30816700 | 0.52029100  | 1.29759000  |
| C | -6.14684700 | 2.00233600  | -0.03630500 |
| H | -5.64884100 | 2.85628500  | 0.43991700  |
| C | -7.56364400 | 1.90075600  | 0.46138300  |
| H | -8.17329900 | 1.11963100  | 0.00460300  |
| C | -8.10140200 | 2.67541700  | 1.40333900  |
| H | -9.13141900 | 2.55346400  | 1.72428500  |
| H | -7.53268400 | 3.46844100  | 1.88392300  |
| H | -6.15245700 | 2.20517800  | -1.11786900 |

**2C<sub>21b</sub>, -1655.77118**

|    |             |             |             |
|----|-------------|-------------|-------------|
| Ti | 0.40934200  | 1.67936300  | 0.23161100  |
| O  | 0.30721800  | -0.11252400 | 0.18590300  |
| C  | -0.44720900 | 2.63277000  | -1.73244000 |
| C  | -0.48598400 | 3.71105000  | -0.78283600 |
| C  | 0.85464500  | 4.03506300  | -0.43725200 |
| C  | 1.72695300  | 3.20650900  | -1.21148900 |
| C  | 0.92887900  | 2.34519000  | -2.01297700 |
| C  | 0.04648100  | -1.46936000 | 0.26781600  |
| C  | -0.20216000 | -2.19712100 | -0.92011500 |
| C  | -0.31050500 | -3.46298500 | 1.57884600  |
| C  | 0.01670300  | -2.10278800 | 1.53642000  |
| C  | -1.63911400 | 2.09018000  | -2.47063200 |
| C  | -1.67694700 | 4.55049000  | -0.42253300 |
| C  | 1.25764500  | 5.17693500  | 0.45429700  |
| C  | 3.20984800  | 3.38296900  | -1.38680400 |
| C  | -0.11847300 | -1.57232800 | -2.30297500 |
| C  | -1.41692300 | -1.75813500 | -3.11171900 |
| C  | 1.09233200  | -2.12316300 | -3.08360700 |
| C  | 0.35118500  | -1.40422200 | 2.84919600  |
| C  | 1.51863500  | -2.10252700 | 3.57881200  |
| C  | -0.86461400 | -1.30495500 | 3.79200400  |
| C  | -0.51470600 | -3.55598100 | -0.80911100 |
| C  | -0.58204700 | -4.19048800 | 0.42570300  |
| C  | 1.47796900  | 1.47456300  | -3.10967000 |
| H  | 0.03482600  | -0.50191100 | -2.16413700 |
| H  | 0.67168300  | -0.38794300 | 2.60821300  |
| H  | 1.20450600  | 6.12433000  | -0.09665300 |
| H  | 0.59455700  | 5.27863800  | 1.31910700  |
| H  | 2.28305000  | 5.08066100  | 0.82060700  |
| H  | 3.39456700  | 3.95783800  | -2.30344400 |
| H  | 3.66805300  | 3.94534500  | -0.56988700 |
| H  | 3.73821500  | 2.43243300  | -1.49946000 |
| H  | 2.19305500  | 0.72920300  | -2.74915300 |
| H  | 0.68871900  | 0.95064500  | -3.64839800 |
| H  | 2.00507700  | 2.10171000  | -3.83883800 |
| H  | -1.87392900 | 2.73885200  | -3.32396000 |
| H  | -1.46233600 | 1.08748100  | -2.86161400 |
| H  | -2.52840100 | 2.04874800  | -1.83804000 |
| H  | -1.57166300 | 5.53826000  | -0.88761800 |
| H  | -2.60918100 | 4.12068400  | -0.78939600 |
| H  | -1.77742200 | 4.71417000  | 0.65462600  |
| H  | -0.71013500 | -4.12539100 | -1.71236800 |
| H  | -0.83443500 | -5.24419000 | 0.48898700  |
| H  | -0.34725300 | -3.96264600 | 2.54181500  |

|   |             |             |             |
|---|-------------|-------------|-------------|
| H | 2.38015700  | -2.25464500 | 2.92192300  |
| H | 1.84008400  | -1.51246300 | 4.44401600  |
| H | 1.22075600  | -3.08672800 | 3.95236300  |
| H | -0.59293100 | -0.78102500 | 4.71494400  |
| H | -1.69842000 | -0.77108200 | 3.32950400  |
| H | -1.22542400 | -2.29951500 | 4.07223200  |
| H | -1.60774700 | -2.81231600 | -3.33425200 |
| H | -2.28652500 | -1.37279600 | -2.57061300 |
| H | -1.34899300 | -1.23470000 | -4.07209500 |
| H | 2.02879600  | -1.95878400 | -2.54035400 |
| H | 0.99465100  | -3.20014900 | -3.25302800 |
| H | 1.17663700  | -1.64156700 | -4.06372300 |
| C | -2.71086400 | 1.81982600  | 1.33095500  |
| C | -1.19368100 | 2.01134600  | 1.50980000  |
| H | -0.82578400 | 1.28525100  | 2.25644100  |
| H | -0.98382200 | 3.02043000  | 1.89830600  |
| C | -3.07227200 | 0.42788900  | 0.77123700  |
| H | -2.49731900 | 0.25404100  | -0.14749600 |
| H | -2.74518000 | -0.34819400 | 1.47479200  |
| C | -4.56402100 | 0.22984000  | 0.46245500  |
| H | -5.15066400 | 0.29955900  | 1.38642700  |
| H | -4.91803300 | 1.04652200  | -0.18423400 |
| C | -4.86347700 | -1.11558100 | -0.21180500 |
| H | -4.31310200 | -1.18004900 | -1.16142800 |
| H | -4.48634800 | -1.93505300 | 0.41370000  |
| C | -6.36398500 | -1.33827000 | -0.48037800 |
| H | -6.91525300 | -1.31258300 | 0.46787400  |
| H | -6.74067300 | -0.49862300 | -1.08384200 |
| C | -6.64566200 | -2.63249800 | -1.19460100 |
| H | -6.19610400 | -2.73714400 | -2.18363400 |
| C | -7.37916900 | -3.63388700 | -0.70867300 |
| H | -7.84945800 | -3.57374000 | 0.27028400  |
| H | -7.54582700 | -4.54698200 | -1.27226100 |
| C | -3.42746100 | 2.11959200  | 2.66451200  |
| H | -3.15654100 | 1.38492300  | 3.43150300  |
| H | -3.15833400 | 3.11116500  | 3.04314900  |
| H | -4.51438400 | 2.09691900  | 2.54823200  |
| H | -3.06145600 | 2.56303700  | 0.60584700  |
| C | 2.01431600  | 2.06878600  | 2.13739100  |
| H | 1.52914900  | 1.44172000  | 2.87968200  |
| C | 3.14163300  | 1.65325000  | 1.50937500  |
| H | 1.73085100  | 3.11891500  | 2.11476600  |
| C | 3.80134900  | 0.32223400  | 1.65339100  |
| H | 3.20757400  | -0.33455400 | 2.29337000  |

|   |            |             |             |
|---|------------|-------------|-------------|
| H | 3.65945000 | 2.36236300  | 0.86832700  |
| C | 4.13069600 | -0.36808000 | 0.31319400  |
| H | 3.19384900 | -0.59205400 | -0.21334700 |
| H | 4.69767700 | 0.32405600  | -0.32474900 |
| C | 4.93705300 | -1.65962200 | 0.50273100  |
| H | 5.87172600 | -1.42841100 | 1.03135100  |
| H | 4.38122600 | -2.35185500 | 1.14773400  |
| C | 5.26205300 | -2.36590600 | -0.82672700 |
| H | 5.79751900 | -1.65909800 | -1.47848600 |
| H | 4.32939900 | -2.62744700 | -1.34303200 |
| C | 6.09728300 | -3.60388500 | -0.63707200 |
| H | 7.08115900 | -3.44983300 | -0.19195100 |
| C | 5.71651500 | -4.83927300 | -0.96112100 |
| H | 4.74566100 | -5.03885300 | -1.40943900 |
| H | 6.36197600 | -5.69688000 | -0.79843300 |
| H | 4.74780200 | 0.51097200  | 2.18498800  |

**2TS<sub>21b</sub>, -1655.7425236, i247.49**

|    |             |             |             |
|----|-------------|-------------|-------------|
| Ti | -0.67036100 | 1.45111700  | -0.30129600 |
| O  | -0.00216900 | -0.21256000 | -0.05069300 |
| C  | -0.69985100 | 2.75525300  | 1.68679200  |
| C  | -0.82140300 | 3.75648900  | 0.66472700  |
| C  | -2.04113600 | 3.54996400  | -0.02273100 |
| C  | -2.72698400 | 2.46677100  | 0.61621900  |
| C  | -1.90232100 | 1.97789900  | 1.67245800  |
| C  | 0.61724100  | -1.43956200 | 0.15292200  |
| C  | 0.89862300  | -1.84984800 | 1.48150600  |
| C  | 1.62518800  | -3.47888100 | -0.67302600 |
| C  | 0.98354300  | -2.26432100 | -0.94961300 |
| C  | 0.36577500  | 2.75674400  | 2.74960300  |
| C  | 0.05216400  | 4.97019200  | 0.54496200  |
| C  | -2.60477900 | 4.41197900  | -1.11596100 |
| C  | -4.18706900 | 2.16051100  | 0.45601200  |
| C  | 0.53043800  | -1.03384500 | 2.71032500  |
| C  | 1.78129500  | -0.60890300 | 3.50625200  |
| C  | -0.45244100 | -1.80270300 | 3.61700700  |
| C  | 0.72718800  | -1.95104100 | -2.42323200 |
| C  | -0.24032500 | -2.97667200 | -3.05658200 |
| C  | 2.02269600  | -1.91233700 | -3.26322600 |
| C  | 1.54305300  | -3.07459000 | 1.68278700  |
| C  | 1.90973300  | -3.89177600 | 0.62162800  |
| C  | -2.36960100 | 1.00399300  | 2.71968000  |
| H  | 0.02959000  | -0.12899000 | 2.36551500  |
| H  | 0.26915400  | -0.96210400 | -2.47860700 |
| H  | -3.27294100 | 5.17513500  | -0.69777700 |

|   |             |             |             |
|---|-------------|-------------|-------------|
| H | -1.82350000 | 4.93991200  | -1.66916100 |
| H | -3.19642300 | 3.83567100  | -1.83392000 |
| H | -4.76267600 | 2.88305500  | 1.04941500  |
| H | -4.53760400 | 2.25643300  | -0.57487800 |
| H | -4.44498700 | 1.16405200  | 0.81363900  |
| H | -2.63869400 | 0.02673000  | 2.30949600  |
| H | -1.61842800 | 0.84681400  | 3.49246500  |
| H | -3.26275800 | 1.40493000  | 3.21289800  |
| H | 0.18417000  | 3.57485800  | 3.45768900  |
| H | 0.38077600  | 1.82924400  | 3.32062200  |
| H | 1.36902500  | 2.90608700  | 2.33913500  |
| H | -0.35644600 | 5.75590000  | 1.19384600  |
| H | 1.07653100  | 4.78976800  | 0.87319600  |
| H | 0.07413000  | 5.38109000  | -0.46692500 |
| H | 1.75903200  | -3.39175900 | 2.69802400  |
| H | 2.40738500  | -4.83955700 | 0.80062000  |
| H | 1.90716200  | -4.11691300 | -1.50410800 |
| H | -1.15964600 | -3.10064700 | -2.47998100 |
| H | -0.51045200 | -2.67118800 | -4.07313100 |
| H | 0.23371500  | -3.96030900 | -3.12655600 |
| H | 1.79258400  | -1.61338400 | -4.29165900 |
| H | 2.76202300  | -1.21676100 | -2.86294500 |
| H | 2.49229600  | -2.89916400 | -3.31256500 |
| H | 2.32769000  | -1.47809400 | 3.88464700  |
| H | 2.47350200  | -0.02649600 | 2.89007300  |
| H | 1.50146300  | -0.00078300 | 4.37361800  |
| H | -1.35447300 | -2.09820900 | 3.07261800  |
| H | 0.00428800  | -2.71301800 | 4.01672700  |
| H | -0.75344900 | -1.18889400 | 4.47269300  |
| C | 1.72669100  | 2.29598400  | -1.05004400 |
| C | 0.54219500  | 2.35957800  | -2.04847400 |
| H | 0.91473200  | 2.04601700  | -3.01970000 |
| H | 0.15865600  | 3.37632100  | -2.13241300 |
| C | 2.65399800  | 1.08464800  | -1.26376000 |
| H | 2.06586900  | 0.16906700  | -1.28845000 |
| H | 3.11353900  | 1.18963500  | -2.25605300 |
| C | 3.75370300  | 0.93121700  | -0.20168000 |
| H | 4.40470600  | 1.81387700  | -0.19513700 |
| H | 3.28797900  | 0.88313100  | 0.79359400  |
| C | 4.61727300  | -0.31982800 | -0.41225500 |
| H | 3.97838300  | -1.21224000 | -0.39524300 |
| H | 5.07728300  | -0.28627500 | -1.40861600 |
| C | 5.72804600  | -0.46911300 | 0.64464300  |
| H | 6.39161400  | 0.40417300  | 0.61197400  |

|                                        |             |             |             |
|----------------------------------------|-------------|-------------|-------------|
| H                                      | 5.26286200  | -0.47307000 | 1.64225800  |
| C                                      | 6.53593100  | -1.72622100 | 0.46628700  |
| H                                      | 5.97883100  | -2.66172300 | 0.53845200  |
| C                                      | 7.84564100  | -1.76781900 | 0.22237100  |
| H                                      | 8.44076300  | -0.86078100 | 0.14337500  |
| H                                      | 8.37484400  | -2.70786800 | 0.09914400  |
| C                                      | 2.53471500  | 3.61087000  | -1.21920700 |
| H                                      | 3.06564300  | 3.57481800  | -2.17567200 |
| H                                      | 1.90897100  | 4.50097100  | -1.22203200 |
| H                                      | 3.27804500  | 3.71854200  | -0.42543800 |
| H                                      | 1.39176400  | 2.28016100  | 0.01438300  |
| C                                      | -1.19544200 | 1.34361300  | -2.72992700 |
| H                                      | -0.62780800 | 0.60155300  | -3.27973500 |
| C                                      | -2.19663400 | 0.88226800  | -1.83274900 |
| H                                      | -1.37728300 | 2.26143300  | -3.27861300 |
| C                                      | -2.58627000 | -0.59763400 | -1.82514700 |
| H                                      | -1.69841100 | -1.21646000 | -1.71574300 |
| H                                      | -3.04118500 | 1.55606800  | -1.74229000 |
| C                                      | -3.61928200 | -1.02434500 | -0.77574900 |
| H                                      | -3.22896800 | -0.82119500 | 0.23065700  |
| H                                      | -4.53169000 | -0.42522000 | -0.88703700 |
| C                                      | -3.98169700 | -2.51169200 | -0.88129100 |
| H                                      | -4.35441100 | -2.72403500 | -1.89274400 |
| H                                      | -3.07969700 | -3.12344000 | -0.75066000 |
| C                                      | -5.03707500 | -2.95179100 | 0.15110600  |
| H                                      | -5.93371800 | -2.32668400 | 0.02336400  |
| H                                      | -4.66364800 | -2.76179600 | 1.16590600  |
| C                                      | -5.41564300 | -4.40222200 | 0.01747600  |
| H                                      | -5.85788600 | -4.69150300 | -0.93692900 |
| C                                      | -5.24169700 | -5.32900500 | 0.95945800  |
| H                                      | -4.80841300 | -5.08558200 | 1.92722200  |
| H                                      | -5.53302600 | -6.36331500 | 0.80442800  |
| H                                      | -2.99797700 | -0.82501700 | -2.82031800 |
| <b>2P<sub>21b</sub>, -1655.7992057</b> |             |             |             |
| Ti                                     | -1.47303800 | 0.02505100  | 0.80306300  |
| O                                      | -1.32736500 | -1.25445400 | -0.43011500 |
| C                                      | -3.19120300 | -0.81276800 | 2.10368500  |
| C                                      | -1.95258200 | -0.98548500 | 2.80133300  |
| C                                      | -1.46303500 | 0.31547800  | 3.18336900  |
| C                                      | -2.37393700 | 1.28334000  | 2.68155600  |
| C                                      | -3.42957500 | 0.59201300  | 1.99338800  |
| C                                      | -1.70003500 | -2.16824900 | -1.38769500 |
| C                                      | -1.02728300 | -3.40500200 | -1.44771800 |
| C                                      | -3.08701400 | -2.75255900 | -3.25915900 |

|   |             |             |             |
|---|-------------|-------------|-------------|
| C | -2.73731000 | -1.81702000 | -2.28110500 |
| C | -4.09045500 | -1.91319700 | 1.61397000  |
| C | -1.33511700 | -2.29745400 | 3.20175200  |
| C | -0.29372600 | 0.57457700  | 4.08838800  |
| C | -2.30442400 | 2.76552600  | 2.91424000  |
| C | 0.09827900  | -3.76708100 | -0.48786000 |
| C | 1.44008900  | -3.91516400 | -1.23250200 |
| C | -0.22536000 | -5.03897100 | 0.31993600  |
| C | -3.41174300 | -0.45179300 | -2.23642600 |
| C | -4.94073000 | -0.52074200 | -2.39464900 |
| C | -2.79376300 | 0.49997900  | -3.28123100 |
| C | -1.42609300 | -4.30215900 | -2.44576600 |
| C | -2.44181200 | -3.98550100 | -3.34312100 |
| C | -4.64010000 | 1.23827400  | 1.37432800  |
| H | 0.20696400  | -2.94177200 | 0.22325300  |
| H | -3.22366500 | -0.01375000 | -1.24011000 |
| H | -0.61307600 | 0.51132500  | 5.13591700  |
| H | 0.50627500  | -0.15534400 | 3.94652700  |
| H | 0.12974100  | 1.57079900  | 3.94041200  |
| H | -2.83692100 | 3.02396200  | 3.83780600  |
| H | -1.27586200 | 3.11586000  | 3.02906600  |
| H | -2.77113500 | 3.33524900  | 2.10658500  |
| H | -4.41885900 | 2.22912100  | 0.96852800  |
| H | -5.06692800 | 0.63215400  | 0.57181400  |
| H | -5.42285200 | 1.36847200  | 2.13163300  |
| H | -4.76583200 | -2.23082100 | 2.41748700  |
| H | -4.71252500 | -1.59162400 | 0.77565700  |
| H | -3.52785100 | -2.79230400 | 1.29130900  |
| H | -1.64795600 | -2.56210500 | 4.21932200  |
| H | -1.64166800 | -3.11181100 | 2.54252300  |
| H | -0.24238900 | -2.25560800 | 3.20243400  |
| H | -0.92870100 | -5.26425600 | -2.52125000 |
| H | -2.73154400 | -4.69713500 | -4.10977100 |
| H | -3.87330300 | -2.51523300 | -3.96840200 |
| H | -5.39187400 | -1.21184900 | -1.67593000 |
| H | -5.38332500 | 0.47001700  | -2.24896000 |
| H | -5.22593800 | -0.85374600 | -3.39692100 |
| H | -3.22959600 | 1.50212900  | -3.20673500 |
| H | -1.70888100 | 0.58126300  | -3.16053000 |
| H | -2.98180800 | 0.12631600  | -4.29268900 |
| H | 1.40741500  | -4.74053100 | -1.95110500 |
| H | 1.69320300  | -3.00468400 | -1.78470000 |
| H | 2.24990700  | -4.12321900 | -0.52552700 |
| H | -1.17301800 | -4.94407000 | 0.86059300  |

|   |             |             |             |
|---|-------------|-------------|-------------|
| H | -0.30496900 | -5.91731600 | -0.32837100 |
| H | 0.56587600  | -5.24038100 | 1.04945100  |
| C | 3.61713300  | -0.99770200 | 0.81266800  |
| C | 2.28576200  | -0.36596200 | 1.27659300  |
| H | 2.47853500  | 0.26034400  | 2.15966900  |
| H | 1.61639900  | -1.17132200 | 1.61504600  |
| C | 4.70887600  | 0.06949600  | 0.58344500  |
| H | 4.30979300  | 0.87055500  | -0.05287700 |
| H | 4.94922300  | 0.54092200  | 1.54794700  |
| C | 6.00057900  | -0.44876800 | -0.06603800 |
| H | 6.47702400  | -1.19382600 | 0.58308200  |
| H | 5.75246800  | -0.97153100 | -1.00106600 |
| C | 7.00939600  | 0.66864200  | -0.36281700 |
| H | 6.54741900  | 1.41042700  | -1.02982300 |
| H | 7.25290500  | 1.20307200  | 0.56482500  |
| C | 8.31359100  | 0.15412700  | -1.00105000 |
| H | 8.79622200  | -0.56414800 | -0.32639900 |
| H | 8.05984700  | -0.39959600 | -1.91764400 |
| C | 9.27785000  | 1.25961100  | -1.33635600 |
| H | 8.91841300  | 2.00328400  | -2.04971300 |
| C | 10.50192700 | 1.39257800  | -0.82550600 |
| H | 10.90328500 | 0.67591200  | -0.11236100 |
| H | 11.15195700 | 2.21657200  | -1.10424500 |
| C | 4.06417100  | -2.06442900 | 1.82527600  |
| H | 4.26952300  | -1.61350000 | 2.80401700  |
| H | 3.28955900  | -2.82700600 | 1.96582400  |
| H | 4.97283200  | -2.57810600 | 1.50174700  |
| H | 3.42973400  | -1.50181600 | -0.14807800 |
| C | 1.54846400  | 0.46315200  | 0.21425800  |
| H | 1.31065900  | -0.17191100 | -0.64873000 |
| C | 0.27990500  | 1.13498300  | 0.74554900  |
| H | 2.21639200  | 1.25155900  | -0.16305600 |
| C | -0.51051000 | 1.95398900  | -0.27389100 |
| H | -1.63810500 | 1.85636600  | -0.11104300 |
| H | 0.48840600  | 1.72576500  | 1.64032800  |
| C | -0.28113300 | 3.47838300  | -0.24156600 |
| H | -0.43117100 | 3.84388700  | 0.78076400  |
| H | 0.77510200  | 3.65108500  | -0.48183200 |
| C | -1.17390300 | 4.25490100  | -1.21595200 |
| H | -1.02166700 | 3.87577700  | -2.23541500 |
| H | -2.23102900 | 4.07431600  | -0.97448900 |
| C | -0.90950200 | 5.77276700  | -1.19033200 |
| H | 0.14987700  | 5.94728300  | -1.42861800 |
| H | -1.07109300 | 6.15863800  | -0.17592800 |



|   |             |            |             |
|---|-------------|------------|-------------|
| C | -1.77568100 | 6.52713000 | -2.16318500 |
| H | -1.64158700 | 6.27365300 | -3.21569800 |
| C | -2.67259000 | 7.45388300 | -1.82650600 |
| H | -2.83292500 | 7.74451400 | -0.79054000 |
| H | -3.27051000 | 7.96760400 | -2.57293600 |
| H | -0.35509500 | 1.56967900 | -1.28836200 |

**Table S4** Optimized Cartesian coordinates (Å) and zero-point energy corrected energy (a.u.) of  $2\mathbf{C}_{\text{cyc}}$ ,  $2\mathbf{TS}_{\text{cyc}}$ , and  $2\mathbf{P}_{\text{cyc}}$ , as well as the imaginary frequency ( $\text{cm}^{-1}$ ) of  $2\mathbf{TS}_{\text{cyc}}$ .

| Atom                                                       | x           | y           | z           |
|------------------------------------------------------------|-------------|-------------|-------------|
| <b><math>2\mathbf{C}_{\text{cyc}}</math>, -1342.894761</b> |             |             |             |
| O                                                          | -0.91764300 | 0.18004300  | 0.10745000  |
| C                                                          | 1.92992600  | -1.48021400 | -2.09190300 |
| C                                                          | 0.51667100  | -1.49717500 | -2.33333000 |
| C                                                          | -0.09143500 | -2.30303900 | -1.32737700 |
| C                                                          | 0.94451900  | -2.77345300 | -0.45433700 |
| C                                                          | 2.19248900  | -2.26537800 | -0.93314600 |
| C                                                          | 2.96198300  | -0.91262300 | -3.02711600 |
| C                                                          | -0.18266500 | -0.91100400 | -3.52809900 |
| C                                                          | -1.53547700 | -2.71164200 | -1.28220500 |
| C                                                          | 0.75514100  | -3.77669700 | 0.64596400  |
| C                                                          | 3.55059600  | -2.59726500 | -0.38544700 |
| C                                                          | -2.27854200 | 0.35666800  | 0.22280100  |
| C                                                          | -2.94143000 | 1.20873700  | -0.69185900 |
| C                                                          | -4.31970700 | 1.38648600  | -0.53059300 |
| C                                                          | -5.02074900 | 0.74624200  | 0.48667000  |
| C                                                          | -4.34514700 | -0.08961700 | 1.37141900  |
| C                                                          | -2.96746200 | -0.30618400 | 1.26692100  |
| C                                                          | -2.19705700 | 1.97445400  | -1.77732200 |
| C                                                          | -2.25012300 | -1.18490900 | 2.28305200  |
| H                                                          | 3.14229100  | -1.62045900 | -3.84559000 |
| H                                                          | 3.92322200  | -0.74892700 | -2.53426300 |
| H                                                          | 2.64619200  | 0.02590900  | -3.49215800 |
| H                                                          | -0.21011200 | -1.64595800 | -4.34238100 |
| H                                                          | 0.32483600  | -0.02495300 | -3.92059400 |
| H                                                          | -1.21586400 | -0.63700900 | -3.30516500 |
| H                                                          | -1.85153500 | -2.98302100 | -0.27327600 |
| H                                                          | -1.69218000 | -3.58900200 | -1.92180300 |
| H                                                          | -2.20068100 | -1.92163500 | -1.63716100 |
| H                                                          | 0.69084600  | -4.78418400 | 0.21670800  |
| H                                                          | -0.16582600 | -3.60510900 | 1.20870700  |
| H                                                          | 1.58665200  | -3.77940800 | 1.35280900  |
| H                                                          | 4.27512100  | -1.79811700 | -0.56372600 |

|    |             |             |             |
|----|-------------|-------------|-------------|
| H  | 3.94135400  | -3.50195100 | -0.86718600 |
| H  | 3.52569500  | -2.79180000 | 0.68899400  |
| Ti | 0.73436000  | -0.39836700 | -0.25917500 |
| C  | -2.92391600 | 1.96927700  | -3.13459800 |
| H  | -3.16819600 | 0.95325400  | -3.46045400 |
| H  | -3.85739000 | 2.53877300  | -3.10101200 |
| H  | -2.29424300 | 2.43210200  | -3.90145300 |
| C  | -1.91597000 | 3.42137600  | -1.31877400 |
| H  | -1.38475900 | 3.44534100  | -0.36106500 |
| H  | -1.31877600 | 3.95987800  | -2.06305100 |
| H  | -2.85262000 | 3.97108100  | -1.18110500 |
| H  | -4.85256500 | 2.04113200  | -1.21225700 |
| H  | -6.09020200 | 0.89965200  | 0.59138800  |
| H  | -4.89938900 | -0.58274900 | 2.16281800  |
| C  | 1.48975300  | -0.73837900 | 1.68000600  |
| C  | 1.44535200  | 1.81085600  | -1.23262100 |
| H  | 1.09928100  | 1.26098900  | -2.10870900 |
| H  | 0.72150300  | 2.44740300  | -0.73643800 |
| H  | 0.63136300  | -0.72429200 | 2.35979900  |
| C  | 2.47342900  | 3.04590600  | 2.28831900  |
| C  | 2.66514100  | 3.71022400  | 0.91226500  |
| C  | 3.47716600  | 2.91717800  | -0.12674900 |
| C  | 1.66028000  | 1.73799800  | 2.31993100  |
| C  | 2.77582100  | 1.94407900  | -1.02572500 |
| C  | 2.44051400  | 0.44000000  | 1.99742100  |
| H  | 3.45774500  | 2.88386400  | 2.74571500  |
| H  | 1.69024100  | 3.98965100  | 0.49319200  |
| H  | 4.33084300  | 2.41522300  | 0.34836900  |
| H  | 0.79268200  | 1.84398000  | 1.65456600  |
| H  | 1.97135800  | 3.77992400  | 2.92866100  |
| H  | 3.18980500  | 4.65759600  | 1.07582600  |
| H  | 3.94882400  | 3.61951600  | -0.83499900 |
| H  | 1.23159000  | 1.60954200  | 3.32225700  |
| H  | 3.44369600  | 1.34074600  | -1.63945800 |
| H  | 2.00731800  | -1.68567800 | 1.82420200  |
| H  | -1.23440200 | 1.47803400  | -1.92863200 |
| H  | -1.30779500 | -1.50926200 | 1.83110200  |
| C  | -3.03431200 | -2.45618100 | 2.65599600  |
| H  | -2.41745300 | -3.10422800 | 3.28713000  |
| H  | -3.94059600 | -2.22832500 | 3.22519500  |
| H  | -3.33350700 | -3.02579700 | 1.77022100  |
| C  | -1.90632500 | -0.37046300 | 3.54819800  |
| H  | -2.81991600 | -0.02861600 | 4.04562000  |
| H  | -1.34338200 | -0.98062600 | 4.26310900  |

|                                                  |             |             |             |
|--------------------------------------------------|-------------|-------------|-------------|
| H                                                | -1.31098800 | 0.51536000  | 3.30623600  |
| C                                                | 3.37351200  | 0.04813100  | 3.16406000  |
| H                                                | 2.78609000  | -0.19938300 | 4.05455700  |
| H                                                | 3.98097700  | -0.82508300 | 2.90722300  |
| H                                                | 4.05742100  | 0.86189200  | 3.42604100  |
| H                                                | 3.09880900  | 0.61812100  | 1.13284000  |
| <b>2TS<sub>cyc</sub>, -1342.8852604, i196.37</b> |             |             |             |
| O                                                | 0.74438900  | -0.07605000 | 0.03545400  |
| C                                                | -2.92028500 | -1.81060400 | -0.46139300 |
| C                                                | -1.66920800 | -2.50479300 | -0.57240000 |
| C                                                | -0.93694900 | -1.92633900 | -1.65493900 |
| C                                                | -1.70945900 | -0.84208800 | -2.17268300 |
| C                                                | -2.94364900 | -0.78427200 | -1.43753300 |
| C                                                | -4.06627400 | -2.19158400 | 0.43197700  |
| C                                                | -1.28012200 | -3.74076900 | 0.18836900  |
| C                                                | 0.36238700  | -2.43423700 | -2.21115500 |
| C                                                | -1.38648400 | -0.02024600 | -3.39016400 |
| C                                                | -4.11272400 | 0.09995400  | -1.76372100 |
| C                                                | 2.11167000  | -0.17338700 | -0.11632100 |
| C                                                | 2.81724800  | -1.11031400 | 0.67716700  |
| C                                                | 4.20896100  | -1.15425500 | 0.54623700  |
| C                                                | 4.88421300  | -0.32130400 | -0.34084100 |
| C                                                | 4.16438200  | 0.57144800  | -1.12757100 |
| C                                                | 2.77046200  | 0.66927100  | -1.04254600 |
| C                                                | 2.12740300  | -2.04510600 | 1.66329800  |
| C                                                | 2.04547200  | 1.65629000  | -1.95055600 |
| H                                                | -4.78077100 | -2.80953900 | -0.12546400 |
| H                                                | -4.61962300 | -1.32248900 | 0.79993200  |
| H                                                | -3.74782500 | -2.78398100 | 1.29307000  |
| H                                                | -1.71698200 | -4.62769500 | -0.28700100 |
| H                                                | -1.63590100 | -3.72652000 | 1.22242000  |
| H                                                | -0.19797800 | -3.88432900 | 0.20929400  |
| H                                                | 0.93410200  | -1.64521500 | -2.70306300 |
| H                                                | 0.17001100  | -3.21572000 | -2.95625200 |
| H                                                | 1.00045500  | -2.86788400 | -1.43824100 |
| H                                                | -1.80987800 | -0.49501600 | -4.28399600 |
| H                                                | -0.31168300 | 0.07309300  | -3.55131000 |
| H                                                | -1.80774900 | 0.98735000  | -3.33307000 |
| H                                                | -4.76079700 | 0.26480000  | -0.89840700 |
| H                                                | -4.73002800 | -0.36542600 | -2.54174300 |
| H                                                | -3.80272100 | 1.07633500  | -2.14636900 |
| Ti                                               | -1.03306000 | -0.26088600 | -0.00240700 |
| C                                                | 2.56134800  | -3.51337300 | 1.48660700  |
| H                                                | 2.42755100  | -3.85486000 | 0.45494300  |

|   |             |             |             |
|---|-------------|-------------|-------------|
| H | 3.61352300  | -3.66216100 | 1.74685400  |
| H | 1.97229100  | -4.16339500 | 2.14202500  |
| C | 2.35581700  | -1.58717000 | 3.11847900  |
| H | 2.02451300  | -0.55584500 | 3.27583400  |
| H | 1.81684100  | -2.23403400 | 3.81951700  |
| H | 3.41865900  | -1.63009400 | 3.37756200  |
| H | 4.77413000  | -1.85627900 | 1.15095800  |
| H | 5.96526700  | -0.37292400 | -0.42308400 |
| H | 4.69482500  | 1.21014300  | -1.82695600 |
| C | -1.92985700 | 1.68177100  | 0.24223000  |
| C | -1.47709200 | -0.78854500 | 2.09358400  |
| H | -2.09145100 | -1.67872700 | 2.06281900  |
| H | -0.51720600 | -0.90616100 | 2.59063300  |
| H | -1.43946500 | 1.46423300  | -0.76806600 |
| C | 0.14450100  | 3.20335200  | 2.62489900  |
| C | -0.20485300 | 1.87009400  | 3.29900800  |
| C | -1.69984200 | 1.49765900  | 3.22360500  |
| C | -0.04589000 | 3.26301500  | 1.10292700  |
| C | -2.13398100 | 0.45143200  | 2.22254800  |
| C | -1.49982400 | 3.11074200  | 0.59964000  |
| H | -0.44602400 | 4.00329900  | 3.09243300  |
| H | 0.41076200  | 1.07150000  | 2.86961900  |
| H | -2.31586400 | 2.39517400  | 3.12941900  |
| H | 0.58930000  | 2.50923300  | 0.62454800  |
| H | 1.19261200  | 3.43485700  | 2.84808400  |
| H | 0.08319500  | 1.93582200  | 4.35324700  |
| H | -2.01021400 | 1.04241100  | 4.17674600  |
| H | 0.33167700  | 4.23447600  | 0.76458100  |
| H | -3.20282200 | 0.44485100  | 2.02030500  |
| H | -3.00179500 | 1.67010600  | 0.03343400  |
| H | 1.05280300  | -2.00456900 | 1.46440400  |
| H | 0.97340000  | 1.59176300  | -1.73547200 |
| C | 2.24826900  | 1.30293600  | -3.43882100 |
| H | 1.65541300  | 1.96669600  | -4.07700700 |
| H | 3.29645100  | 1.41650600  | -3.73209500 |
| H | 1.96314500  | 0.26911300  | -3.65797600 |
| C | 2.49037200  | 3.11001300  | -1.69113100 |
| H | 3.54289400  | 3.25318900  | -1.95464900 |
| H | 1.90304600  | 3.80479300  | -2.30109100 |
| H | 2.37178000  | 3.39054700  | -0.64166800 |
| C | -1.75088600 | 4.01017500  | -0.63453200 |
| H | -1.06357800 | 3.75941000  | -1.45119500 |
| H | -2.77547400 | 3.91398500  | -1.00820300 |
| H | -1.58696600 | 5.06029900  | -0.37461300 |

|                                        |             |             |             |
|----------------------------------------|-------------|-------------|-------------|
| H                                      | -2.18441100 | 3.46817200  | 1.37802700  |
| <b>2P<sub>cyc</sub>, -1342.9132433</b> |             |             |             |
| O                                      | 0.99190100  | -0.17169100 | -0.12967900 |
| C                                      | -1.44369300 | 3.00336000  | 0.05410600  |
| C                                      | -0.01645000 | 3.06410400  | -0.03160200 |
| C                                      | 0.53119100  | 2.51927400  | 1.17741400  |
| C                                      | -0.55809300 | 2.07963900  | 1.98535200  |
| C                                      | -1.77920800 | 2.37472500  | 1.28867800  |
| C                                      | -2.41151900 | 3.62662400  | -0.90672100 |
| C                                      | 0.76668400  | 3.69982300  | -1.14468600 |
| C                                      | 1.98668800  | 2.48734200  | 1.54729500  |
| C                                      | -0.46161200 | 1.48728800  | 3.36474100  |
| C                                      | -3.16935400 | 2.20594500  | 1.83962900  |
| C                                      | 2.25416800  | -0.70900600 | -0.07589400 |
| C                                      | 3.12780900  | -0.48078700 | -1.16300600 |
| C                                      | 4.39957800  | -1.05843000 | -1.09300200 |
| C                                      | 4.78728600  | -1.82982700 | 0.00047800  |
| C                                      | 3.90103300  | -2.04058800 | 1.05389900  |
| C                                      | 2.61690700  | -1.48563400 | 1.04663200  |
| C                                      | 2.69329700  | 0.31232000  | -2.38919400 |
| C                                      | 1.64483700  | -1.77367500 | 2.18382000  |
| H                                      | -2.70110800 | 4.62155800  | -0.54694300 |
| H                                      | -3.33070700 | 3.04374100  | -1.01198500 |
| H                                      | -1.97616400 | 3.75774800  | -1.89944500 |
| H                                      | 0.83729400  | 4.78251300  | -0.98221200 |
| H                                      | 0.29460200  | 3.54560900  | -2.11828500 |
| H                                      | 1.78651600  | 3.31341100  | -1.19908700 |
| H                                      | 2.21234200  | 1.68871000  | 2.25684100  |
| H                                      | 2.27459600  | 3.43604900  | 2.01580800  |
| H                                      | 2.62898800  | 2.34256900  | 0.67584300  |
| H                                      | -0.58701300 | 2.27358700  | 4.11927600  |
| H                                      | 0.50784200  | 1.01822100  | 3.54361300  |
| H                                      | -1.23795100 | 0.73965800  | 3.55274600  |
| H                                      | -3.90785500 | 2.02405700  | 1.05446000  |
| H                                      | -3.47643500 | 3.11959100  | 2.36313600  |
| H                                      | -3.23281400 | 1.38864900  | 2.56268900  |
| Ti                                     | -0.50620100 | 0.77274700  | 0.04427100  |
| C                                      | 3.77459400  | 1.28337200  | -2.89582400 |
| H                                      | 4.12648100  | 1.94877200  | -2.10063600 |
| H                                      | 4.64570300  | 0.75537000  | -3.29565300 |
| H                                      | 3.37486800  | 1.90107800  | -3.70641300 |
| C                                      | 2.24014400  | -0.64028900 | -3.51574900 |
| H                                      | 1.43656700  | -1.30422200 | -3.18023300 |
| H                                      | 1.87947400  | -0.07340700 | -4.38077900 |

|   |             |             |             |
|---|-------------|-------------|-------------|
| H | 3.07068300  | -1.27096400 | -3.84956400 |
| H | 5.09732300  | -0.90642900 | -1.90988200 |
| H | 5.77925500  | -2.26957900 | 0.02981600  |
| H | 4.21166700  | -2.65046200 | 1.89627200  |
| C | -2.26946400 | -0.97656400 | -0.00695300 |
| C | -1.38807600 | 0.66588400  | -1.80546300 |
| H | -1.67875200 | 1.51983000  | -2.41445200 |
| H | -0.75135900 | -0.00577500 | -2.39461200 |
| H | -1.33478900 | -1.53210600 | -0.18034300 |
| C | -3.47279300 | -3.39234800 | -1.77397800 |
| C | -2.80339400 | -2.32250000 | -2.65247900 |
| C | -3.32761600 | -0.90061400 | -2.38526000 |
| C | -3.13205000 | -3.36393500 | -0.27739300 |
| C | -2.62782900 | -0.09434200 | -1.24925500 |
| C | -3.32308500 | -2.02177500 | 0.46399100  |
| H | -4.56053500 | -3.30052300 | -1.89591900 |
| H | -1.70954500 | -2.36381900 | -2.55155700 |
| H | -4.39816100 | -0.96224200 | -2.15340200 |
| H | -2.09078900 | -3.68622500 | -0.12947400 |
| H | -3.21141000 | -4.38533600 | -2.15746800 |
| H | -3.00926000 | -2.56893600 | -3.69971400 |
| H | -3.25292900 | -0.29484300 | -3.29372900 |
| H | -3.75016700 | -4.11697500 | 0.22553500  |
| H | -3.35159300 | 0.65271500  | -0.90278000 |
| H | -2.12819200 | -0.32559500 | 0.89643200  |
| H | 1.82448800  | 0.91505500  | -2.10442300 |
| H | 0.80332700  | -1.07622100 | 2.09029200  |
| C | 2.26629400  | -1.54713800 | 3.57424500  |
| H | 1.50906600  | -1.67495400 | 4.35472900  |
| H | 3.06684400  | -2.26327700 | 3.78237600  |
| H | 2.69174200  | -0.54272400 | 3.66924800  |
| C | 1.07370600  | -3.20202100 | 2.06489400  |
| H | 1.86931100  | -3.94820600 | 2.15766500  |
| H | 0.34126500  | -3.39568000 | 2.85641800  |
| H | 0.58758300  | -3.36046200 | 1.09649200  |
| C | -3.22314400 | -2.23941900 | 1.98192200  |
| H | -2.23476500 | -2.62288400 | 2.26241300  |
| H | -3.39892300 | -1.31038700 | 2.53652000  |
| H | -3.96594500 | -2.96775600 | 2.31850700  |
| H | -4.32045900 | -1.62024900 | 0.24151800  |

**Table S4** Optimized Cartesian coordinates (Å) and zero-point energy corrected energy (a.u.) of **3C<sub>12</sub>**, **3TS<sub>12</sub>**, **3P<sub>12</sub>**, **3C<sub>cyc</sub>**, **3TS<sub>cyc</sub>** and **3P<sub>cyc</sub>**, as well as the imaginary frequency (cm<sup>-1</sup>) of **3TS<sub>12</sub>**, and

**3TS<sub>eye</sub>**

| Atom                                  | x           | y           | z           |
|---------------------------------------|-------------|-------------|-------------|
| <b>3C<sub>12</sub>, -1968.6798553</b> |             |             |             |
| Ti                                    | 1.73893100  | -1.45798200 | 0.23201100  |
| O                                     | 2.56513900  | 0.07078700  | -0.20006400 |
| C                                     | 1.98518500  | -3.44253500 | 1.67408300  |
| C                                     | 1.88514300  | -3.91418000 | 0.33648900  |
| C                                     | 3.00582000  | -3.40120800 | -0.40007500 |
| C                                     | 3.78709500  | -2.60055100 | 0.47969600  |
| C                                     | 3.14353200  | -2.60836100 | 1.76073200  |
| C                                     | 3.45869700  | 1.05705400  | -0.56913100 |
| C                                     | 4.05655100  | 1.86790500  | 0.42643900  |
| C                                     | 4.62030800  | 2.26818900  | -2.30207900 |
| C                                     | 3.73574200  | 1.24562200  | -1.94509000 |
| C                                     | 1.14276500  | -3.88991600 | 2.83078900  |
| C                                     | 0.88672400  | -4.93002400 | -0.14610200 |
| C                                     | 3.37500600  | -3.75147300 | -1.81586100 |
| C                                     | 5.11221600  | -1.97382300 | 0.15393800  |
| C                                     | 3.80293500  | 1.70766600  | 1.92170700  |
| C                                     | 3.12379400  | 2.95711600  | 2.51983400  |
| C                                     | 5.10886000  | 1.41431200  | 2.69025500  |
| C                                     | 3.09276700  | 0.41295800  | -3.04592200 |
| C                                     | 4.13750800  | -0.28369800 | -3.93949300 |
| C                                     | 2.12925800  | 1.26425400  | -3.89862200 |
| C                                     | 4.93435900  | 2.87259600  | 0.00107300  |
| C                                     | 5.21919500  | 3.07934300  | -1.34395500 |
| C                                     | 3.68831500  | -2.02498900 | 3.03205600  |
| H                                     | 3.12605300  | 0.85956100  | 2.06331700  |
| H                                     | 2.50293100  | -0.37278200 | -2.56621800 |
| H                                     | 4.10553400  | -4.56958500 | -1.81886700 |
| H                                     | 2.51556500  | -4.09100100 | -2.39933300 |
| H                                     | 3.83500400  | -2.91279500 | -2.34566900 |
| H                                     | 5.92453600  | -2.67305900 | 0.38727600  |
| H                                     | 5.19518900  | -1.71732800 | -0.90456700 |
| H                                     | 5.28881800  | -1.06151800 | 0.72575800  |
| H                                     | 4.37841700  | -1.20263900 | 2.84588500  |
| H                                     | 2.89734400  | -1.66390800 | 3.69448000  |
| H                                     | 4.24164700  | -2.79713600 | 3.58146200  |
| H                                     | 1.59793300  | -4.77194600 | 3.29844600  |
| H                                     | 1.05828800  | -3.12214900 | 3.60308600  |
| H                                     | 0.13289500  | -4.17287400 | 2.52223700  |
| H                                     | 1.17501300  | -5.92933700 | 0.20190300  |
| H                                     | -0.12030100 | -4.73838900 | 0.23690100  |
| H                                     | 0.83512100  | -4.97841500 | -1.23616600 |

|   |              |             |             |
|---|--------------|-------------|-------------|
| H | 5.40310900   | 3.50807900  | 0.74575100  |
| H | 5.90195200   | 3.86797900  | -1.64378600 |
| H | 4.84053700   | 2.43279400  | -3.35233900 |
| H | 4.83219400   | -0.89140500 | -3.35056400 |
| H | 3.64579200   | -0.93396600 | -4.67092100 |
| H | 4.73481200   | 0.44227000  | -4.49909200 |
| H | 1.61425700   | 0.64452400  | -4.64105000 |
| H | 1.37798900   | 1.76548800  | -3.27889600 |
| H | 2.67107700   | 2.04521300  | -4.44098600 |
| H | 3.78419100   | 3.82825200  | 2.46223800  |
| H | 2.19866200   | 3.20674500  | 1.99669300  |
| H | 2.88730500   | 2.79255000  | 3.57649200  |
| H | 5.65197400   | 0.55825500  | 2.27761400  |
| H | 5.78863200   | 2.27118300  | 2.65681200  |
| H | 4.89488700   | 1.21017000  | 3.74456700  |
| C | -2.85788900  | 1.00753100  | 2.87206400  |
| C | -1.59910200  | 0.11236800  | 2.81589600  |
| H | -1.92443100  | -0.92618800 | 2.97210900  |
| H | -0.96319600  | 0.35866700  | 3.67773800  |
| C | -3.90325700  | 0.58408300  | 1.82127100  |
| H | -3.43572800  | 0.58748600  | 0.82688300  |
| H | -4.19104400  | -0.46031700 | 2.01538700  |
| C | -5.17243000  | 1.44663100  | 1.75486100  |
| H | -5.72277900  | 1.37647500  | 2.70072200  |
| H | -4.89630600  | 2.50448600  | 1.63897900  |
| C | -6.10062900  | 1.03122800  | 0.60641200  |
| H | -5.57981700  | 1.17297900  | -0.35196000 |
| H | -6.31577500  | -0.04331800 | 0.68251500  |
| C | -7.43703200  | 1.79621400  | 0.57144800  |
| H | -7.98503300  | 1.61978600  | 1.50519300  |
| H | -7.22720900  | 2.87502900  | 0.52866500  |
| C | -8.29266800  | 1.40247500  | -0.60249500 |
| H | -7.88720600  | 1.64041600  | -1.58748300 |
| C | -9.47128700  | 0.78340600  | -0.52167900 |
| H | -9.91805800  | 0.53082700  | 0.43736800  |
| H | -10.04023100 | 0.51824200  | -1.40783000 |
| C | -3.43216400  | 0.96703900  | 4.29913000  |
| H | -3.77241300  | -0.04340500 | 4.55727100  |
| H | -2.67655600  | 1.26123700  | 5.03509600  |
| H | -4.28242900  | 1.64409800  | 4.41534300  |
| H | -2.56273100  | 2.04616800  | 2.66785200  |
| C | -0.68495500  | 0.16017000  | 1.55517900  |
| H | -1.29002100  | -0.13211900 | 0.68685900  |
| C | 0.40221700   | -0.92788600 | 1.76993200  |



|                                                 |             |             |             |
|-------------------------------------------------|-------------|-------------|-------------|
| H                                               | 1.04714200  | -0.64518500 | 2.61753400  |
| H                                               | -0.09786900 | -1.85466700 | 2.07140200  |
| C                                               | -0.11060800 | 1.57644700  | 1.30165900  |
| H                                               | -0.02508100 | 2.09995700  | 2.26341600  |
| H                                               | 0.90893200  | 1.49279500  | 0.91539900  |
| C                                               | -0.90675600 | 2.45197200  | 0.31925500  |
| H                                               | -1.95283700 | 2.53593400  | 0.63616600  |
| H                                               | -0.92850100 | 1.95886600  | -0.66446300 |
| C                                               | -0.31825500 | 3.85889200  | 0.15157100  |
| H                                               | -0.30586100 | 4.36440200  | 1.12707000  |
| H                                               | 0.72953000  | 3.78691100  | -0.16921800 |
| C                                               | -1.09326500 | 4.72687900  | -0.85814500 |
| H                                               | -2.14354000 | 4.78519900  | -0.53514000 |
| H                                               | -1.09596100 | 4.23847900  | -1.84158600 |
| C                                               | -0.53310400 | 6.11736100  | -0.98836600 |
| H                                               | -0.53299200 | 6.71611800  | -0.07629500 |
| C                                               | -0.04369300 | 6.64600200  | -2.10993600 |
| H                                               | -0.02746500 | 6.08841500  | -3.04404000 |
| H                                               | 0.34941000  | 7.65761200  | -2.14168400 |
| C                                               | 0.31138200  | -1.97948900 | -1.72012500 |
| C                                               | -0.42450400 | -0.88059700 | -2.01177400 |
| H                                               | 1.35307900  | -2.01425500 | -2.05092000 |
| H                                               | -0.15996000 | -2.92882300 | -1.49354100 |
| H                                               | 0.10424100  | 0.01696100  | -2.33206600 |
| C                                               | -1.91426500 | -0.77886100 | -2.02479200 |
| H                                               | -2.20909500 | 0.10716100  | -1.44524400 |
| H                                               | -2.16860100 | -0.50691900 | -3.06357600 |
| C                                               | -2.72496100 | -2.00503400 | -1.59585100 |
| H                                               | -2.37722600 | -2.89052100 | -2.14422800 |
| H                                               | -2.55336700 | -2.20608800 | -0.52958600 |
| C                                               | -4.22731000 | -1.81784800 | -1.85236200 |
| H                                               | -4.57440500 | -0.90727200 | -1.34752600 |
| H                                               | -4.39472100 | -1.65857500 | -2.92546100 |
| C                                               | -5.07851100 | -3.01196700 | -1.38325100 |
| H                                               | -4.72956200 | -3.93143300 | -1.87067600 |
| H                                               | -4.92191500 | -3.14974300 | -0.30243300 |
| C                                               | -6.54670100 | -2.82092500 | -1.65927700 |
| C                                               | -7.28762400 | -3.62515400 | -2.42139200 |
| H                                               | -7.01267700 | -1.94812500 | -1.19941800 |
| H                                               | -8.34383000 | -3.43816200 | -2.58931300 |
| H                                               | -6.86727900 | -4.50626200 | -2.90144200 |
| <b>3TS<sub>12</sub>, -1968.6747858, i212.33</b> |             |             |             |
| Ti                                              | 1.77877100  | 1.12006000  | -0.31143200 |
| O                                               | 2.52803300  | -0.48047400 | 0.00397800  |

|   |             |             |             |
|---|-------------|-------------|-------------|
| C | 1.75921100  | 3.04277300  | -1.79169600 |
| C | 2.33842700  | 3.52955900  | -0.59269200 |
| C | 3.52808300  | 2.77169200  | -0.33144500 |
| C | 3.72487200  | 1.86527700  | -1.41654300 |
| C | 2.61414700  | 2.00381400  | -2.30412300 |
| C | 3.39999200  | -1.54577600 | 0.09693000  |
| C | 3.45594200  | -2.50470300 | -0.94041800 |
| C | 5.09936200  | -2.72458700 | 1.33564900  |
| C | 4.21498800  | -1.64593100 | 1.25289700  |
| C | 0.57337500  | 3.61871800  | -2.51366500 |
| C | 1.92247000  | 4.75475700  | 0.16635500  |
| C | 4.49179500  | 3.02724800  | 0.79288500  |
| C | 4.93542100  | 1.00218900  | -1.62383300 |
| C | 2.57054100  | -2.46595200 | -2.18036200 |
| C | 1.62521900  | -3.68482600 | -2.22350300 |
| C | 3.39529600  | -2.40584600 | -3.48245100 |
| C | 4.09828100  | -0.65032800 | 2.39964200  |
| C | 5.41099500  | -0.42305400 | 3.16809400  |
| C | 2.97560700  | -1.08284900 | 3.36790300  |
| C | 4.36216300  | -3.56320400 | -0.79444800 |
| C | 5.17983400  | -3.67760500 | 0.32305500  |
| C | 2.45378600  | 1.33805500  | -3.64380000 |
| H | 1.95218000  | -1.56332400 | -2.12880000 |
| H | 3.81926700  | 0.31550000  | 1.96479300  |
| H | 5.14743000  | 3.87167700  | 0.54594800  |
| H | 3.98062100  | 3.28011500  | 1.72619500  |
| H | 5.13404100  | 2.16467000  | 0.98322700  |
| H | 5.73853000  | 1.59404800  | -2.07970300 |
| H | 5.31967500  | 0.59338100  | -0.68650800 |
| H | 4.73088700  | 0.16158800  | -2.28784900 |
| H | 2.91633600  | 0.35070400  | -3.67427700 |
| H | 1.40331700  | 1.22779300  | -3.92621300 |
| H | 2.93307200  | 1.94632200  | -4.42103400 |
| H | 0.90437200  | 4.32706400  | -3.28279200 |
| H | -0.01623400 | 2.85060700  | -3.02312200 |
| H | -0.09377200 | 4.16243600  | -1.84044300 |
| H | 2.47623100  | 5.62022500  | -0.21911300 |
| H | 0.86018600  | 4.97662500  | 0.05877800  |
| H | 2.15419400  | 4.68737100  | 1.23266800  |
| H | 4.42328300  | -4.31395700 | -1.57610900 |
| H | 5.87450500  | -4.50716300 | 0.40925900  |
| H | 5.73618700  | -2.82329500 | 2.20752600  |
| H | 6.23717100  | -0.17077000 | 2.49593100  |
| H | 5.28792800  | 0.39945400  | 3.87976500  |

|   |              |             |             |
|---|--------------|-------------|-------------|
| H | 5.70622300   | -1.30302600 | 3.74768500  |
| H | 2.83999000   | -0.34658700 | 4.16829000  |
| H | 2.02043100   | -1.21183000 | 2.84821900  |
| H | 3.22461100   | -2.04125500 | 3.83462300  |
| H | 2.18938100   | -4.61225400 | -2.36391300 |
| H | 1.05285300   | -3.78523400 | -1.29851800 |
| H | 0.92273600   | -3.59817700 | -3.05954900 |
| H | 4.10532800   | -1.57345600 | -3.48688400 |
| H | 3.97491900   | -3.32285600 | -3.62592200 |
| H | 2.73539300   | -2.29874500 | -4.34986100 |
| C | -3.18834200  | -1.47450400 | -2.23167000 |
| C | -1.94710400  | -0.55989600 | -2.11061900 |
| H | -2.21687100  | 0.43214400  | -2.50035400 |
| H | -1.16129800  | -0.94704800 | -2.77505300 |
| C | -4.41993100  | -0.86494700 | -1.52963000 |
| H | -4.15173500  | -0.57284900 | -0.50502800 |
| H | -4.69572600  | 0.06624500  | -2.04652300 |
| C | -5.64748800  | -1.78467300 | -1.45026300 |
| H | -5.99799100  | -2.03268400 | -2.45954300 |
| H | -5.35836100  | -2.73819800 | -0.98492000 |
| C | -6.80746400  | -1.16599400 | -0.65905800 |
| H | -6.47142200  | -0.93422500 | 0.36185500  |
| H | -7.09307000  | -0.20691200 | -1.11092500 |
| C | -8.04873600  | -2.07571100 | -0.59073000 |
| H | -8.40888100  | -2.28483300 | -1.60581500 |
| H | -7.75048700  | -3.04314900 | -0.15931500 |
| C | -9.16334600  | -1.48527700 | 0.22990000  |
| H | -8.93075400  | -1.29309600 | 1.27878100  |
| C | -10.37704000 | -1.18044900 | -0.22948200 |
| H | -10.65503100 | -1.35575800 | -1.26640800 |
| H | -11.14101300 | -0.75221900 | 0.41251800  |
| C | -3.45868000  | -1.75887900 | -3.71888200 |
| H | -3.70049600  | -0.83439400 | -4.25736100 |
| H | -2.58334000  | -2.20697300 | -4.20135000 |
| H | -4.29506200  | -2.44915800 | -3.85373600 |
| H | -2.95949900  | -2.43479000 | -1.74763100 |
| C | -1.33051800  | -0.39957800 | -0.69189000 |
| H | -2.13170100  | -0.03970800 | -0.03684000 |
| C | -0.29074200  | 0.72808100  | -0.74901700 |
| H | 0.44774700   | 0.44087100  | -1.57092300 |
| H | -0.76032500  | 1.65647800  | -1.08460100 |
| C | -0.80203900  | -1.74101200 | -0.11793400 |
| H | -0.71635600  | -2.46938200 | -0.93182900 |
| H | 0.21591100   | -1.61498100 | 0.26931800  |

|   |             |             |            |
|---|-------------|-------------|------------|
| C | -1.67945800 | -2.34262200 | 0.99317400 |
| H | -2.70257000 | -2.48376300 | 0.62154200 |
| H | -1.76193200 | -1.62720300 | 1.82529000 |
| C | -1.14302200 | -3.67624500 | 1.52721400 |
| H | -1.07804700 | -4.39823400 | 0.70138400 |
| H | -0.11703900 | -3.54196300 | 1.89592100 |
| C | -2.00722900 | -4.27159500 | 2.65511200 |
| H | -3.03425100 | -4.39546400 | 2.28044200 |
| H | -2.06320100 | -3.56298400 | 3.49143900 |
| C | -1.49163700 | -5.59616700 | 3.14927800 |
| H | -1.44868500 | -6.39576300 | 2.40814500 |
| C | -1.08830100 | -5.84521000 | 4.39514200 |
| H | -1.11793500 | -5.08049000 | 5.16834700 |
| H | -0.72400100 | -6.82356000 | 4.69350900 |
| C | 1.24195600  | 1.76973100  | 1.71329600 |
| C | -0.03879900 | 1.22880800  | 1.46764000 |
| H | 1.94658700  | 1.14274400  | 2.25425200 |
| H | 1.32938500  | 2.83269200  | 1.90124400 |
| H | -0.15267500 | 0.16714900  | 1.66904300 |
| C | -1.32319900 | 2.01455400  | 1.63777400 |
| H | -2.13944800 | 1.53557400  | 1.09004200 |
| H | -1.57299100 | 1.86155600  | 2.70018400 |
| C | -1.32085700 | 3.51699000  | 1.34598400 |
| H | -0.55279900 | 4.01919000  | 1.94578200 |
| H | -1.06001900 | 3.68793400  | 0.29334600 |
| C | -2.68370500 | 4.16134100  | 1.63904100 |
| H | -3.45954400 | 3.66485200  | 1.04020000 |
| H | -2.95227400 | 3.99176200  | 2.68943500 |
| C | -2.70892400 | 5.67443300  | 1.35286900 |
| H | -1.95479200 | 6.17953100  | 1.96972800 |
| H | -2.41934700 | 5.83831700  | 0.30321500 |
| C | -4.05928100 | 6.29209400  | 1.60004000 |
| C | -4.31035100 | 7.24546400  | 2.49679900 |
| H | -4.87779000 | 5.90575700  | 0.99101600 |
| H | -5.30772400 | 7.65159500  | 2.63424700 |
| H | -3.52506300 | 7.66125600  | 3.12421000 |

**3P<sub>12</sub>, -1968.6978635**

|    |             |             |             |
|----|-------------|-------------|-------------|
| Ti | -2.23835300 | -1.07096400 | -0.56425900 |
| O  | -3.00534400 | 0.36708200  | 0.15641800  |
| C  | -2.03382900 | -2.55181700 | -2.43080600 |
| C  | -2.62467200 | -3.31700300 | -1.38616300 |
| C  | -3.86470300 | -2.69232700 | -1.03584000 |
| C  | -4.07126700 | -1.57613500 | -1.91357600 |
| C  | -2.93017800 | -1.47759000 | -2.76104400 |

|   |             |             |             |
|---|-------------|-------------|-------------|
| C | -3.84376300 | 1.39381100  | 0.51705700  |
| C | -3.85962000 | 2.57672200  | -0.25404200 |
| C | -5.48627600 | 2.28192800  | 2.02905900  |
| C | -4.64685400 | 1.22379200  | 1.67012600  |
| C | -0.76922600 | -2.89187100 | -3.17100200 |
| C | -2.11774300 | -4.62166100 | -0.84803100 |
| C | -4.84671400 | -3.20427200 | -0.02032100 |
| C | -5.30718700 | -0.72468300 | -1.96743500 |
| C | -2.96023500 | 2.78684600  | -1.46561700 |
| C | -1.86482600 | 3.82983700  | -1.16353500 |
| C | -3.75450600 | 3.18874000  | -2.72351900 |
| C | -4.55948300 | -0.03770600 | 2.51990200  |
| C | -5.90365400 | -0.45908700 | 3.13753800  |
| C | -3.48463000 | 0.12759500  | 3.61573400  |
| C | -4.71618400 | 3.60219100  | 0.16317200  |
| C | -5.52522300 | 3.46085400  | 1.28642400  |
| C | -2.72149700 | -0.48533500 | -3.87223500 |
| H | -2.45793400 | 1.83672500  | -1.68351400 |
| H | -4.23668100 | -0.85479400 | 1.86543500  |
| H | -5.49655200 | -3.96123200 | -0.47696200 |
| H | -4.34848700 | -3.67320300 | 0.83183400  |
| H | -5.49332300 | -2.41032000 | 0.35990800  |
| H | -6.07562500 | -1.22044700 | -2.57268100 |
| H | -5.73224100 | -0.54994600 | -0.97624000 |
| H | -5.11310600 | 0.25004500  | -2.41808300 |
| H | -3.31033900 | 0.42246800  | -3.72978700 |
| H | -1.67173800 | -0.19497000 | -3.97750700 |
| H | -3.02682000 | -0.92567500 | -4.82949800 |
| H | -1.00355500 | -3.50648000 | -4.04886400 |
| H | -0.24613500 | -2.00287200 | -3.53320600 |
| H | -0.07369400 | -3.46663400 | -2.55424800 |
| H | -2.48504600 | -5.44680700 | -1.47046500 |
| H | -1.02590600 | -4.67677700 | -0.85239900 |
| H | -2.46311400 | -4.80714700 | 0.17152000  |
| H | -4.74767200 | 4.52842700  | -0.40211200 |
| H | -6.18394300 | 4.26964000  | 1.58681000  |
| H | -6.11828800 | 2.18598200  | 2.90517100  |
| H | -6.69145900 | -0.53729300 | 2.38149400  |
| H | -5.80120900 | -1.43358900 | 3.62533800  |
| H | -6.24319300 | 0.24567300  | 3.90280100  |
| H | -3.37910400 | -0.79406700 | 4.19871800  |
| H | -2.50914000 | 0.37879800  | 3.18705000  |
| H | -3.75857400 | 0.93174600  | 4.30650700  |
| H | -2.30529300 | 4.81102900  | -0.95974400 |

|   |             |             |             |
|---|-------------|-------------|-------------|
| H | -1.26983300 | 3.54629000  | -0.29091700 |
| H | -1.19047800 | 3.93990600  | -2.01973600 |
| H | -4.55003300 | 2.47211800  | -2.95186900 |
| H | -4.22569500 | 4.16900700  | -2.60357600 |
| H | -3.08945300 | 3.25268900  | -3.59110900 |
| C | 3.36293700  | 0.92221700  | -2.35207400 |
| C | 2.06220600  | 0.16183400  | -2.01026100 |
| H | 2.19396600  | -0.88601900 | -2.31850300 |
| H | 1.25280100  | 0.56546000  | -2.63861100 |
| C | 4.59411700  | 0.28199900  | -1.67670200 |
| H | 4.39699000  | 0.15159400  | -0.60425900 |
| H | 4.73247000  | -0.73102300 | -2.08305700 |
| C | 5.90326200  | 1.07164100  | -1.82334700 |
| H | 6.18050000  | 1.14949700  | -2.88175800 |
| H | 5.74782900  | 2.10224600  | -1.47236600 |
| C | 7.06943900  | 0.44368200  | -1.04867200 |
| H | 6.80856500  | 0.38117300  | 0.01748200  |
| H | 7.22326400  | -0.58989700 | -1.38573100 |
| C | 8.38972000  | 1.22203900  | -1.20360900 |
| H | 8.67320800  | 1.26042300  | -2.26289600 |
| H | 8.22188800  | 2.26253000  | -0.88695400 |
| C | 9.51601100  | 0.63109100  | -0.39949800 |
| H | 9.36296800  | 0.59975900  | 0.68065800  |
| C | 10.65033400 | 0.14758300  | -0.90598100 |
| H | 10.84789000 | 0.15897000  | -1.97560400 |
| H | 11.42722800 | -0.27058500 | -0.27291900 |
| C | 3.51935300  | 0.99218200  | -3.88053000 |
| H | 3.63043600  | -0.01123700 | -4.30978900 |
| H | 2.64540600  | 1.46038100  | -4.34682600 |
| H | 4.39602900  | 1.57547500  | -4.17240000 |
| H | 3.26782300  | 1.95341100  | -1.98340400 |
| C | 1.57767600  | 0.19424800  | -0.54249500 |
| H | 2.36482900  | -0.23070200 | 0.09070400  |
| C | 0.36597800  | -0.76697000 | -0.40193100 |
| H | -0.39106500 | -0.27855700 | -1.08610100 |
| H | 0.61026400  | -1.72175500 | -0.88008000 |
| C | 1.25665000  | 1.62757400  | -0.04276500 |
| H | 1.05579100  | 2.27091100  | -0.90976400 |
| H | 0.32737200  | 1.62607300  | 0.54116900  |
| C | 2.35096500  | 2.27093900  | 0.82467000  |
| H | 3.29973200  | 2.29511300  | 0.27476300  |
| H | 2.52895400  | 1.63923700  | 1.70663000  |
| C | 1.99430500  | 3.69026000  | 1.28328800  |
| H | 1.82864600  | 4.32659600  | 0.40275400  |

|   |             |             |            |
|---|-------------|-------------|------------|
| H | 1.04300900  | 3.67428900  | 1.83239200 |
| C | 3.07530300  | 4.32905200  | 2.17592600 |
| H | 4.02856800  | 4.32707600  | 1.62648900 |
| H | 3.22849900  | 3.71118600  | 3.06976600 |
| C | 2.73741200  | 5.73700200  | 2.58599100 |
| H | 2.62344200  | 6.45460900  | 1.77191300 |
| C | 2.56471800  | 6.14929400  | 3.84179300 |
| H | 2.67209500  | 5.47070600  | 4.68520600 |
| H | 2.31975500  | 7.18075100  | 4.07648400 |
| C | -1.38940200 | -2.01859700 | 1.04027900 |
| C | -0.17650200 | -1.03866800 | 1.03592300 |
| H | -1.97072000 | -1.91465900 | 1.96082800 |
| H | -1.07724000 | -3.05556900 | 0.92091100 |
| H | -0.50961600 | -0.08437100 | 1.45919600 |
| C | 0.94517600  | -1.56216900 | 1.98541400 |
| H | 1.66363700  | -0.74930500 | 2.14695900 |
| H | 0.47389100  | -1.74526600 | 2.95808700 |
| C | 1.70172200  | -2.82291600 | 1.54667900 |
| H | 0.99703700  | -3.64219800 | 1.35255700 |
| H | 2.23224000  | -2.64115700 | 0.60198200 |
| C | 2.71746700  | -3.28419500 | 2.60260000 |
| H | 3.42782700  | -2.47085200 | 2.80461200 |
| H | 2.19960700  | -3.48017400 | 3.55012400 |
| C | 3.49407400  | -4.54656700 | 2.18323300 |
| H | 2.79088000  | -5.36998100 | 2.00364300 |
| H | 3.99647400  | -4.34727100 | 1.22444700 |
| C | 4.51560900  | -4.96911800 | 3.20460100 |
| C | 4.51212300  | -6.13275000 | 3.85451800 |
| H | 5.30368200  | -4.24499000 | 3.41635500 |
| H | 5.27556100  | -6.38146700 | 4.58530100 |
| H | 3.74747000  | -6.88526200 | 3.67451100 |

**3C<sub>cyt</sub>, -1655.798526**

|    |             |             |             |
|----|-------------|-------------|-------------|
| Ti | -1.10118800 | -0.51471300 | -0.19281800 |
| O  | -2.68091400 | 0.18830600  | 0.26120800  |
| C  | 0.14473700  | -0.52675400 | -2.26951600 |
| C  | 0.32636100  | -1.82692000 | -1.72792700 |
| C  | -0.95955500 | -2.46228100 | -1.64962300 |
| C  | -1.93516700 | -1.55305300 | -2.14972500 |
| C  | -1.26141100 | -0.34120400 | -2.50099100 |
| C  | -3.97414200 | 0.65820000  | 0.28824300  |
| C  | -4.20352200 | 2.02335700  | -0.00428200 |
| C  | -6.32367300 | 0.28535300  | 0.64390500  |
| C  | -5.02283400 | -0.22850400 | 0.63041700  |
| C  | 1.23827800  | 0.38456100  | -2.73881800 |

|   |             |             |             |
|---|-------------|-------------|-------------|
| C | 1.65941600  | -2.48315600 | -1.49403300 |
| C | -1.21345600 | -3.89732200 | -1.27432100 |
| C | -3.39225800 | -1.83434700 | -2.38076600 |
| C | -3.05965600 | 2.99545300  | -0.26261800 |
| C | -2.65338900 | 3.69740300  | 1.05114900  |
| C | -3.36790500 | 4.03177600  | -1.35743700 |
| C | -4.75485800 | -1.66627900 | 1.05575000  |
| C | -5.82145700 | -2.66524300 | 0.57417800  |
| C | -4.59475500 | -1.74614200 | 2.58946100  |
| C | -5.52764900 | 2.47398400  | 0.02414800  |
| C | -6.58056500 | 1.61904600  | 0.33742700  |
| C | -1.89473300 | 0.84525400  | -3.17064500 |
| H | -2.19876600 | 2.41300100  | -0.60143900 |
| H | -3.80472700 | -1.96995300 | 0.60256300  |
| H | -1.10360900 | -4.53792300 | -2.15775600 |
| H | -0.50993900 | -4.27082600 | -0.52568600 |
| H | -2.22568200 | -4.05313000 | -0.89226400 |
| H | -3.56011500 | -2.06851700 | -3.43918800 |
| H | -3.74276000 | -2.69031400 | -1.80097700 |
| H | -4.02429000 | -0.97896400 | -2.13078000 |
| H | -2.93211800 | 0.98384400  | -2.85819300 |
| H | -1.35283400 | 1.77156200  | -2.96591100 |
| H | -1.89535200 | 0.70280200  | -4.25861000 |
| H | 1.51602800  | 0.12084200  | -3.76724100 |
| H | 0.92951300  | 1.43215300  | -2.74928800 |
| H | 2.13814600  | 0.30215700  | -2.12655600 |
| H | 2.10294700  | -2.76938400 | -2.45582000 |
| H | 2.37340400  | -1.81861600 | -1.00033300 |
| H | 1.57655000  | -3.39799700 | -0.90305100 |
| H | -5.73713300 | 3.51512000  | -0.19671300 |
| H | -7.59929300 | 1.99355000  | 0.35254900  |
| H | -7.14986400 | -0.36789500 | 0.90299600  |
| H | -5.98849200 | -2.59369000 | -0.50477300 |
| H | -5.50902300 | -3.68879600 | 0.80586900  |
| H | -6.78290900 | -2.50746200 | 1.07188400  |
| H | -4.31923400 | -2.75911100 | 2.90350000  |
| H | -3.83293800 | -1.04909700 | 2.95283100  |
| H | -5.53521600 | -1.48598700 | 3.08569300  |
| H | -3.47745400 | 4.30846200  | 1.43407300  |
| H | -2.39022000 | 2.97333900  | 1.82893700  |
| H | -1.79284800 | 4.35515900  | 0.88864400  |
| H | -3.69997200 | 3.55686500  | -2.28593300 |
| H | -4.14356200 | 4.73891500  | -1.04789700 |
| H | -2.47115200 | 4.62000700  | -1.57744600 |



|   |             |             |             |
|---|-------------|-------------|-------------|
| C | 3.89577700  | 2.34735200  | 0.68743600  |
| C | 2.39548800  | 2.25786500  | 0.32887100  |
| H | 2.30515100  | 2.37377200  | -0.75944200 |
| H | 1.88162800  | 3.12611900  | 0.76437700  |
| C | 4.72351700  | 1.25002700  | -0.01369800 |
| H | 4.27225700  | 0.26780400  | 0.18642900  |
| H | 4.65391000  | 1.39785100  | -1.10215600 |
| C | 6.20344000  | 1.18062200  | 0.39156300  |
| H | 6.71148300  | 2.11297000  | 0.11748500  |
| H | 6.27872700  | 1.10378800  | 1.48609100  |
| C | 6.94560900  | 0.00169900  | -0.25144600 |
| H | 6.45831300  | -0.94035600 | 0.04014100  |
| H | 6.86027500  | 0.06290300  | -1.34454200 |
| C | 8.43689800  | -0.06009200 | 0.12986200  |
| H | 8.93737700  | 0.86165000  | -0.19178800 |
| H | 8.51689000  | -0.09250000 | 1.22689400  |
| C | 9.14346500  | -1.25148900 | -0.45811000 |
| H | 8.76504400  | -2.22797800 | -0.15028000 |
| C | 10.16435700 | -1.19479000 | -1.31345400 |
| H | 10.57696200 | -0.24517500 | -1.64679200 |
| H | 10.63230200 | -2.09242800 | -1.70653800 |
| C | 4.40689400  | 3.75692000  | 0.34176900  |
| H | 4.34580500  | 3.94251800  | -0.73766500 |
| H | 3.81126900  | 4.52550600  | 0.84532700  |
| H | 5.44739700  | 3.89874700  | 0.64494600  |
| H | 4.00628500  | 2.21981900  | 1.77351600  |
| C | 1.59443400  | 0.99601900  | 0.75673500  |
| H | 2.07333900  | 0.11763000  | 0.30299400  |
| C | 0.14388800  | 1.12587600  | 0.22798400  |
| H | -0.48218000 | 1.61380100  | 0.98971600  |
| H | 0.09820600  | 1.77295300  | -0.65621700 |
| C | 1.57695700  | 0.81613300  | 2.30035700  |
| H | 1.63584100  | 1.81046700  | 2.76070700  |
| H | 0.59922200  | 0.42409400  | 2.60733200  |
| C | 2.66370900  | -0.07605200 | 2.92210300  |
| H | 3.66049700  | 0.26609600  | 2.62738400  |
| H | 2.61651300  | 0.04206200  | 4.01244100  |
| C | 2.55601500  | -1.57684000 | 2.60309500  |
| H | 3.35011600  | -2.10063600 | 3.14359400  |
| H | 2.74956400  | -1.76097700 | 1.53923800  |
| C | -1.02145900 | -1.99281500 | 1.75044000  |
| C | 0.24798300  | -2.44675800 | 1.86740000  |
| H | -1.48657600 | -1.39067000 | 2.52606500  |
| H | -1.69285400 | -2.47210600 | 1.03113700  |

|                                                         |             |             |             |
|---------------------------------------------------------|-------------|-------------|-------------|
| H                                                       | 0.62562100  | -3.11782400 | 1.09708400  |
| C                                                       | 1.18612400  | -2.19589900 | 3.00219200  |
| H                                                       | 0.69840800  | -1.59898900 | 3.77952000  |
| H                                                       | 1.36414000  | -3.18952100 | 3.43921800  |
| <b>3TS<sub>cyc</sub>, -1655.7872801, <i>i</i>175.80</b> |             |             |             |
| Ti                                                      | -1.12403900 | -0.80154400 | -0.07772300 |
| O                                                       | -2.59148000 | 0.19803800  | 0.14334400  |
| C                                                       | 0.39243400  | -1.86848200 | -1.65027800 |
| C                                                       | -0.34832100 | -2.92682200 | -1.06563900 |
| C                                                       | -1.73564900 | -2.72769000 | -1.36956100 |
| C                                                       | -1.84597000 | -1.55773000 | -2.18258900 |
| C                                                       | -0.53542300 | -1.01161100 | -2.34126700 |
| C                                                       | -3.75645600 | 0.91155900  | -0.00240000 |
| C                                                       | -3.69644600 | 2.20295000  | -0.57384900 |
| C                                                       | -6.13327900 | 1.09622800  | 0.30043900  |
| C                                                       | -4.96809800 | 0.33491800  | 0.44097400  |
| C                                                       | 1.89210500  | -1.77262300 | -1.68957900 |
| C                                                       | 0.24378800  | -4.12684100 | -0.38276700 |
| C                                                       | -2.85291800 | -3.67575000 | -1.03654700 |
| C                                                       | -3.09912900 | -1.04529300 | -2.83289300 |
| C                                                       | -2.37766700 | 2.83395200  | -1.00201100 |
| C                                                       | -1.83842900 | 3.76703700  | 0.10228300  |
| C                                                       | -2.46739900 | 3.57784200  | -2.34662200 |
| C                                                       | -5.00720500 | -1.03479600 | 1.10631600  |
| C                                                       | -6.21037600 | -1.89046600 | 0.67194800  |
| C                                                       | -4.96881100 | -0.88914100 | 2.64251600  |
| C                                                       | -4.89643300 | 2.91291600  | -0.68913300 |
| C                                                       | -6.10473600 | 2.37119500  | -0.25878300 |
| C                                                       | -0.17418700 | 0.15014100  | -3.22690700 |
| H                                                       | -1.64989500 | 2.02533700  | -1.13131300 |
| H                                                       | -4.10332200 | -1.57311100 | 0.80308600  |
| H                                                       | -2.88670900 | -4.48980900 | -1.77113200 |
| H                                                       | -2.73141700 | -4.13905700 | -0.05312100 |
| H                                                       | -3.82634500 | -3.18168900 | -1.05471500 |
| H                                                       | -3.23512300 | -1.52180700 | -3.81136700 |
| H                                                       | -3.98887200 | -1.25747300 | -2.23649900 |
| H                                                       | -3.06485700 | 0.03414600  | -2.99520500 |
| H                                                       | -0.96198600 | 0.90643500  | -3.25720400 |
| H                                                       | 0.75083700  | 0.64030400  | -2.91324600 |
| H                                                       | -0.02128700 | -0.19974000 | -4.25529000 |
| H                                                       | 2.28581500  | -2.38477900 | -2.51045300 |
| H                                                       | 2.24000500  | -0.75161500 | -1.85711500 |
| H                                                       | 2.35415600  | -2.13622900 | -0.76776900 |
| H                                                       | 0.60637500  | -4.83723700 | -1.13581900 |

|   |             |             |             |
|---|-------------|-------------|-------------|
| H | 1.09990400  | -3.87257300 | 0.24911100  |
| H | -0.48525100 | -4.66465000 | 0.22809900  |
| H | -4.88445800 | 3.90862500  | -1.12025200 |
| H | -7.02242600 | 2.94252400  | -0.35707300 |
| H | -7.07946500 | 0.68507500  | 0.63648600  |
| H | -6.27374200 | -1.97738500 | -0.41764600 |
| H | -6.12598500 | -2.89853800 | 1.09077600  |
| H | -7.15880100 | -1.47585600 | 1.02679000  |
| H | -4.93837800 | -1.87110600 | 3.12793900  |
| H | -4.09719800 | -0.31240900 | 2.97032500  |
| H | -5.85980800 | -0.36545000 | 3.00401600  |
| H | -2.52208200 | 4.60595500  | 0.26863300  |
| H | -1.73024700 | 3.24030500  | 1.05637400  |
| H | -0.86271500 | 4.17968300  | -0.17762700 |
| H | -2.87566000 | 2.93903000  | -3.13655600 |
| H | -3.10054800 | 4.46778500  | -2.28111500 |
| H | -1.47334900 | 3.91476200  | -2.65845900 |
| C | 3.83897400  | 2.18159500  | 0.08838500  |
| C | 2.33224300  | 1.84159000  | -0.00021900 |
| H | 2.15129800  | 1.38362100  | -0.98264400 |
| H | 1.74842200  | 2.77184500  | 0.01190800  |
| C | 4.72010800  | 0.96420400  | -0.26352000 |
| H | 4.37565400  | 0.08580900  | 0.30006000  |
| H | 4.57473800  | 0.71831300  | -1.32637900 |
| C | 6.22020700  | 1.14290900  | 0.01325100  |
| H | 6.61895100  | 1.96568300  | -0.59259700 |
| H | 6.36266600  | 1.43902400  | 1.06236800  |
| C | 7.03556700  | -0.12534600 | -0.27115900 |
| H | 6.65662000  | -0.95042000 | 0.34925000  |
| H | 6.88664400  | -0.43474900 | -1.31421200 |
| C | 8.54403400  | 0.05152700  | -0.01353300 |
| H | 8.93577700  | 0.85149800  | -0.65407300 |
| H | 8.68507600  | 0.38541200  | 1.02541300  |
| C | 9.32917600  | -1.21142900 | -0.24369300 |
| H | 9.06328800  | -2.05857900 | 0.39102900  |
| C | 10.29282000 | -1.36184300 | -1.15240500 |
| H | 10.59383900 | -0.54538700 | -1.80507600 |
| H | 10.82346000 | -2.30147800 | -1.27359600 |
| C | 4.14174800  | 3.38926900  | -0.81416700 |
| H | 3.92450700  | 3.15823500  | -1.86436600 |
| H | 3.53616200  | 4.25648100  | -0.53084600 |
| H | 5.19108200  | 3.68812000  | -0.75209400 |
| H | 4.07007400  | 2.47426300  | 1.12277500  |
| C | 1.77637800  | 0.91596000  | 1.12300300  |

|   |             |             |             |
|---|-------------|-------------|-------------|
| H | 2.45310300  | 0.05623300  | 1.20530600  |
| C | 0.38010400  | 0.41549100  | 0.73132000  |
| H | -0.38782100 | 1.10088000  | 1.11089700  |
| H | 0.32868700  | 0.43212100  | -0.40096700 |
| C | 1.73374600  | 1.68500800  | 2.47384800  |
| H | 2.38675600  | 2.56034400  | 2.40569400  |
| H | 0.72555500  | 2.09742200  | 2.60529800  |
| C | 2.14234800  | 0.91186200  | 3.73777000  |
| H | 3.23585200  | 0.84604500  | 3.78793800  |
| H | 1.84188800  | 1.51357000  | 4.60401400  |
| C | 1.58094000  | -0.51220700 | 3.88779300  |
| H | 1.69872500  | -0.81194300 | 4.93388300  |
| H | 2.20480600  | -1.21351800 | 3.31984700  |
| C | -1.29401700 | -2.04291500 | 1.78018000  |
| C | -0.07115500 | -1.50396300 | 2.18283800  |
| H | -2.19616300 | -1.72412200 | 2.29727000  |
| H | -1.30901700 | -3.04952600 | 1.38334000  |
| H | 0.82736400  | -2.00020200 | 1.82022400  |
| C | 0.10670400  | -0.72276500 | 3.47224300  |
| H | -0.46082700 | 0.21367700  | 3.45745000  |
| H | -0.39154700 | -1.34112600 | 4.22987300  |

**3P<sub>eyes</sub> -1655.8202074**

|    |             |             |             |
|----|-------------|-------------|-------------|
| Ti | -1.29464100 | -0.91216200 | -0.27677300 |
| O  | -2.55762500 | 0.30053700  | 0.04117400  |
| C  | 0.19004500  | -1.96924700 | -1.82901500 |
| C  | -0.75635400 | -2.96132300 | -1.43849900 |
| C  | -2.05586300 | -2.49931800 | -1.82081400 |
| C  | -1.90684100 | -1.24225700 | -2.49684300 |
| C  | -0.52097200 | -0.90917700 | -2.48826700 |
| C  | -3.58125000 | 1.21416100  | -0.00701300 |
| C  | -3.30034900 | 2.53206400  | -0.42909700 |
| C  | -5.89299000 | 1.75114100  | 0.35089400  |
| C  | -4.87135900 | 0.79716200  | 0.39255400  |
| C  | 1.68576400  | -2.08846700 | -1.71620600 |
| C  | -0.43293300 | -4.31073600 | -0.87008900 |
| C  | -3.34079300 | -3.25843100 | -1.64838000 |
| C  | -3.00885800 | -0.46151500 | -3.15445500 |
| C  | -1.89323900 | 2.98554300  | -0.79661700 |
| C  | -1.27335100 | 3.81763900  | 0.34523600  |
| C  | -1.84316800 | 3.75901300  | -2.12709700 |
| C  | -5.13361900 | -0.61376300 | 0.90402800  |
| C  | -6.45642100 | -1.21006900 | 0.39159000  |
| C  | -5.07873700 | -0.64632900 | 2.44619400  |

|   |             |             |             |
|---|-------------|-------------|-------------|
| C | -4.36395100 | 3.44086200  | -0.44267800 |
| C | -5.64794300 | 3.05917700  | -0.06210600 |
| C | 0.10841500  | 0.29637800  | -3.13069200 |
| H | -1.27350600 | 2.08930500  | -0.92107200 |
| H | -4.32572600 | -1.25564400 | 0.53654100  |
| H | -3.47061100 | -3.96775100 | -2.47521900 |
| H | -3.35594700 | -3.83368400 | -0.71916900 |
| H | -4.20946200 | -2.59667700 | -1.65020100 |
| H | -3.17765800 | -0.83626700 | -4.17109200 |
| H | -3.95324500 | -0.54559400 | -2.61199800 |
| H | -2.76838800 | 0.60073000  | -3.23168500 |
| H | -0.58829800 | 1.13362200  | -3.20700400 |
| H | 0.99360800  | 0.64145800  | -2.58859500 |
| H | 0.43392600  | 0.05011500  | -4.14896700 |
| H | 2.08789000  | -2.59275700 | -2.60342500 |
| H | 2.17884600  | -1.11512800 | -1.65142000 |
| H | 1.98733500  | -2.67980400 | -0.84794000 |
| H | -0.13891900 | -4.99237600 | -1.67756100 |
| H | 0.39774600  | -4.27692500 | -0.15981700 |
| H | -1.29213900 | -4.75914300 | -0.36704200 |
| H | -4.18346400 | 4.46512000  | -0.75323200 |
| H | -6.45753300 | 3.78195500  | -0.08326300 |
| H | -6.89650900 | 1.46821600  | 0.65087800  |
| H | -6.52505900 | -1.16582500 | -0.70026200 |
| H | -6.53883500 | -2.25806900 | 0.69699600  |
| H | -7.32740000 | -0.68873100 | 0.80037000  |
| H | -5.21404300 | -1.66790200 | 2.81751000  |
| H | -4.12242900 | -0.26731100 | 2.82144900  |
| H | -5.87082200 | -0.02439200 | 2.87609900  |
| H | -1.84459100 | 4.73664800  | 0.51134200  |
| H | -1.26606100 | 3.26069200  | 1.28792400  |
| H | -0.24353600 | 4.10212300  | 0.10387800  |
| H | -2.29272100 | 3.18741600  | -2.94578500 |
| H | -2.37595900 | 4.71250400  | -2.06232000 |
| H | -0.80640900 | 3.98687500  | -2.39573600 |
| C | 3.71469000  | 1.95921000  | 0.95918000  |
| C | 2.23032000  | 1.52637800  | 0.95865700  |
| H | 1.92846100  | 1.37665400  | -0.08999000 |
| H | 1.61050500  | 2.35270500  | 1.33304100  |
| C | 4.57696600  | 1.01043100  | 0.09893800  |
| H | 4.34874700  | -0.03213500 | 0.36182200  |
| H | 4.28345800  | 1.12889100  | -0.95564600 |
| C | 6.09449200  | 1.20763000  | 0.22628400  |
| H | 6.37058200  | 2.21929200  | -0.09539800 |

|   |             |             |             |
|---|-------------|-------------|-------------|
| H | 6.38156900  | 1.13435300  | 1.28484200  |
| C | 6.90016800  | 0.18808500  | -0.58958500 |
| H | 6.64459500  | -0.82881500 | -0.25840800 |
| H | 6.60882200  | 0.24704100  | -1.64681700 |
| C | 8.42349600  | 0.38933500  | -0.47988500 |
| H | 8.68970700  | 1.39116100  | -0.83937600 |
| H | 8.70568000  | 0.35317600  | 0.58300800  |
| C | 9.20690100  | -0.64617800 | -1.24044200 |
| H | 9.06586200  | -1.67954200 | -0.91879300 |
| C | 10.02992700 | -0.39237600 | -2.25791200 |
| H | 10.20429700 | 0.62151200  | -2.61125700 |
| H | 10.56754400 | -1.18456100 | -2.77036700 |
| C | 3.82933700  | 3.41934600  | 0.49243400  |
| H | 3.45849400  | 3.53243500  | -0.53407800 |
| H | 3.24455700  | 4.08648800  | 1.13444900  |
| H | 4.86367800  | 3.77167100  | 0.50987500  |
| H | 4.08931200  | 1.90937900  | 1.99198400  |
| C | 1.89797700  | 0.26285400  | 1.78664200  |
| H | 2.64509500  | -0.50945000 | 1.56411600  |
| C | 0.50941300  | -0.29281000 | 1.36325700  |
| H | -0.25056600 | 0.43603200  | 1.68261400  |
| H | 0.58763900  | -0.24318800 | 0.24018800  |
| C | 1.91177700  | 0.57402800  | 3.30263800  |
| H | 2.61165600  | 1.39516500  | 3.48838600  |
| H | 0.92546700  | 0.96935700  | 3.58024400  |
| C | 2.29119200  | -0.59055800 | 4.23356300  |
| H | 3.38250600  | -0.69364100 | 4.25864200  |
| H | 1.99426000  | -0.31409100 | 5.25202700  |
| C | 1.68564100  | -1.96189700 | 3.88114900  |
| H | 1.72617300  | -2.59493000 | 4.77430200  |
| H | 2.31523100  | -2.46992200 | 3.13876400  |
| C | -1.32846900 | -2.12745100 | 1.37196400  |
| C | 0.11145800  | -1.73039700 | 1.82429300  |
| H | -2.07738600 | -1.68228800 | 2.03911400  |
| H | -1.45635900 | -3.20830800 | 1.35598300  |
| H | 0.81887100  | -2.41974000 | 1.34617700  |
| C | 0.23762800  | -1.94307100 | 3.35822500  |
| H | -0.36634600 | -1.19382500 | 3.88610800  |
| H | -0.22796400 | -2.91082900 | 3.57169700  |

**Table S5** Optimized Cartesian coordinates (Å) and zero-point energy corrected energy (a.u.) of **4C**, **4TS**, and **4P**, as well as the imaginary frequency (cm<sup>-1</sup>) of **4TS**

| Atom | x | y | z |
|------|---|---|---|
|------|---|---|---|

**4C, -1655.8045789**

|    |             |             |             |
|----|-------------|-------------|-------------|
| O  | 1.93191900  | -0.11415300 | -0.46225600 |
| C  | 0.02963800  | -0.09052100 | 3.14546600  |
| C  | 1.14290600  | 0.73780700  | 2.80823000  |
| C  | 2.25627500  | -0.11794900 | 2.50537800  |
| C  | 1.81555700  | -1.46727000 | 2.62625300  |
| C  | 0.43363600  | -1.44971900 | 3.00382500  |
| C  | -1.28692100 | 0.34414000  | 3.72368600  |
| C  | 1.20871800  | 2.23423700  | 2.91592400  |
| C  | 3.66717800  | 0.32800800  | 2.24962400  |
| C  | 2.68678700  | -2.68748800 | 2.52678800  |
| C  | -0.39455800 | -2.63597700 | 3.41420900  |
| C  | 3.08421700  | 0.14509300  | -1.17197500 |
| C  | 3.41209300  | 1.48856800  | -1.47146100 |
| C  | 4.58435500  | 1.72780400  | -2.19662500 |
| C  | 5.40454400  | 0.68814400  | -2.62243700 |
| C  | 5.05419000  | -0.62545500 | -2.32756200 |
| C  | 3.89850900  | -0.93115600 | -1.60032500 |
| C  | 2.52802900  | 2.66217600  | -1.07473200 |
| C  | 3.54367800  | -2.39172400 | -1.35497900 |
| H  | -1.35716400 | 0.00202600  | 4.76324000  |
| H  | -2.14550300 | -0.07592900 | 3.19107400  |
| H  | -1.39272600 | 1.42897800  | 3.73390700  |
| H  | 1.56833900  | 2.52050700  | 3.91221800  |
| H  | 0.23399000  | 2.70211200  | 2.77026800  |
| H  | 1.89933900  | 2.66578000  | 2.18814800  |
| H  | 4.21152300  | -0.37085600 | 1.61109400  |
| H  | 4.21152900  | 0.40267900  | 3.19901200  |
| H  | 3.70713000  | 1.30839800  | 1.77156400  |
| H  | 3.15927700  | -2.88455300 | 3.49719500  |
| H  | 3.48952900  | -2.56494800 | 1.79774500  |
| H  | 2.12146400  | -3.58563000 | 2.26377600  |
| H  | -1.45236800 | -2.50890100 | 3.16635800  |
| H  | -0.33553500 | -2.76923400 | 4.50163500  |
| H  | -0.04578500 | -3.56694900 | 2.96159400  |
| Ti | 0.70128000  | -0.44774600 | 0.80298300  |
| C  | 3.30016700  | 3.75565600  | -0.31130500 |
| H  | 3.82336700  | 3.35288800  | 0.56226600  |
| H  | 4.04930600  | 4.24126600  | -0.94418100 |
| H  | 2.61252300  | 4.53574400  | 0.03198100  |
| C  | 1.83459800  | 3.25769300  | -2.31735700 |
| H  | 1.22486200  | 2.50929300  | -2.83313900 |
| H  | 1.18622200  | 4.09362900  | -2.03580200 |
| H  | 2.57179500  | 3.63588200  | -3.03292100 |

|   |             |             |             |
|---|-------------|-------------|-------------|
| H | 4.85478600  | 2.75117300  | -2.43710400 |
| H | 6.30758400  | 0.89944000  | -3.18633500 |
| H | 5.68966000  | -1.43482300 | -2.67299900 |
| C | -3.27784500 | 1.56596500  | 0.48955800  |
| C | -0.91806800 | 0.70374200  | 0.33174000  |
| H | -0.77083400 | 0.62778100  | -0.76077800 |
| H | -1.45689800 | -0.22623400 | 0.64945500  |
| H | -3.41092000 | 1.01888600  | -0.45439100 |
| C | -3.30244700 | 4.12649200  | -1.47019500 |
| C | -1.95294500 | 3.38877900  | -1.51123600 |
| C | -1.32298300 | 3.17988600  | -0.12051800 |
| C | -4.49002000 | 3.35269400  | -0.88057700 |
| C | -1.77797200 | 1.92670100  | 0.66723700  |
| C | -4.29273300 | 2.73345600  | 0.51903800  |
| H | -3.16154900 | 5.05716300  | -0.90291900 |
| H | -2.05659100 | 2.43120100  | -2.04193200 |
| H | -1.54011500 | 4.06925100  | 0.48387700  |
| H | -4.77488000 | 2.54335800  | -1.56935300 |
| H | -3.56979200 | 4.43483400  | -2.48822800 |
| H | -1.26241900 | 3.98691000  | -2.11629900 |
| H | -0.23232200 | 3.14602900  | -0.20843100 |
| H | -5.35096200 | 4.03170400  | -0.84699100 |
| H | -1.63875500 | 2.15491100  | 1.72886900  |
| H | -3.53142200 | 0.84930600  | 1.28269700  |
| H | 1.74705000  | 2.28283900  | -0.40924800 |
| H | 2.70863600  | -2.41633600 | -0.64789200 |
| C | 4.70404900  | -3.18725900 | -0.72586700 |
| H | 4.37782900  | -4.19977200 | -0.46599500 |
| H | 5.54464300  | -3.28703900 | -1.41887100 |
| H | 5.08551900  | -2.70543900 | 0.17985200  |
| C | 3.07909400  | -3.07169800 | -2.66076600 |
| H | 3.89873200  | -3.12059100 | -3.38450500 |
| H | 2.74225600  | -4.09656600 | -2.47045000 |
| H | 2.26305300  | -2.52025800 | -3.13954700 |
| C | -5.64304700 | 2.24252700  | 1.06729600  |
| H | -6.05875500 | 1.44886000  | 0.43425800  |
| H | -5.54184800 | 1.84086800  | 2.08137100  |
| H | -6.37621900 | 3.05433400  | 1.10110800  |
| H | -3.91948900 | 3.51172300  | 1.20151700  |
| C | -0.12324800 | -2.76835500 | 0.08127200  |
| C | -0.38837400 | -2.37545100 | -1.18734200 |
| H | 0.88633700  | -3.06544200 | 0.35803700  |
| H | -0.91968700 | -3.03464700 | 0.76765700  |
| H | 0.45586100  | -2.20609500 | -1.85417300 |



|                                    |             |             |             |
|------------------------------------|-------------|-------------|-------------|
| C                                  | -1.73815400 | -2.18387900 | -1.80671200 |
| H                                  | -1.80484500 | -1.14920300 | -2.17541600 |
| H                                  | -1.73532900 | -2.79188900 | -2.72504000 |
| C                                  | -2.96265300 | -2.53278400 | -0.95581200 |
| H                                  | -2.88353900 | -3.57255800 | -0.61215300 |
| H                                  | -2.98311300 | -1.90593300 | -0.05382900 |
| C                                  | -4.27923700 | -2.34977400 | -1.72311800 |
| H                                  | -4.35894200 | -1.30951400 | -2.06825100 |
| H                                  | -4.26865800 | -2.97251900 | -2.62664700 |
| C                                  | -5.51951600 | -2.70495300 | -0.88217600 |
| H                                  | -5.51328600 | -2.08801300 | 0.02952400  |
| H                                  | -5.45573700 | -3.75010000 | -0.55427900 |
| C                                  | -6.80972200 | -2.48619900 | -1.62611500 |
| H                                  | -7.00545600 | -1.46249500 | -1.94885000 |
| C                                  | -7.69614600 | -3.43857600 | -1.91487500 |
| H                                  | -8.61051900 | -3.22183100 | -2.45855100 |
| H                                  | -7.54348200 | -4.47208800 | -1.61211600 |
| <b>4TS, -1655.7883053, i197.74</b> |             |             |             |
| O                                  | 1.93831200  | -0.24591200 | -0.38126600 |
| C                                  | -0.60990200 | -1.65560100 | 2.40868100  |
| C                                  | 0.71317100  | -1.14315900 | 2.66639600  |
| C                                  | 1.65137100  | -1.98257400 | 1.99407400  |
| C                                  | 0.91292200  | -2.97093100 | 1.27327700  |
| C                                  | -0.47865500 | -2.78826500 | 1.56748400  |
| C                                  | -1.87419800 | -1.19269100 | 3.08071200  |
| C                                  | 1.05000500  | -0.03675300 | 3.62911600  |
| C                                  | 3.14635300  | -1.90195700 | 2.10000000  |
| C                                  | 1.48939600  | -4.12636700 | 0.50559300  |
| C                                  | -1.56589700 | -3.75986500 | 1.21512100  |
| C                                  | 3.24937000  | 0.05592300  | -0.66921600 |
| C                                  | 3.83917500  | 1.19587100  | -0.07720500 |
| C                                  | 5.17000500  | 1.48098100  | -0.40440400 |
| C                                  | 5.89289800  | 0.67600300  | -1.27864400 |
| C                                  | 5.28624800  | -0.43802400 | -1.85342200 |
| C                                  | 3.95938100  | -0.77503900 | -1.56853700 |
| C                                  | 3.06734400  | 2.13613100  | 0.83982900  |
| C                                  | 3.29071100  | -1.95572500 | -2.26033100 |
| H                                  | -2.01265800 | -1.72748400 | 4.02843000  |
| H                                  | -2.76068800 | -1.38161800 | 2.47048600  |
| H                                  | -1.85261700 | -0.12624400 | 3.32027100  |
| H                                  | 1.16003800  | -0.44323600 | 4.64215900  |
| H                                  | 0.26929600  | 0.72722200  | 3.67283900  |
| H                                  | 1.98961800  | 0.45837800  | 3.37530500  |
| H                                  | 3.64461800  | -2.22652000 | 1.18433900  |

|    |             |             |             |
|----|-------------|-------------|-------------|
| H  | 3.49469000  | -2.54946600 | 2.91404000  |
| H  | 3.48956100  | -0.88881200 | 2.31757900  |
| H  | 1.51277800  | -5.02409500 | 1.13597500  |
| H  | 2.51357500  | -3.93119700 | 0.18236900  |
| H  | 0.89648900  | -4.37178600 | -0.38031300 |
| H  | -2.55250600 | -3.29477700 | 1.19467700  |
| H  | -1.59691300 | -4.55476000 | 1.97116100  |
| H  | -1.39475300 | -4.25119200 | 0.25362700  |
| Ti | 0.40304800  | -0.79537400 | 0.37569900  |
| C  | 3.84572300  | 2.50915500  | 2.11544200  |
| H  | 4.18709900  | 1.62127500  | 2.65768200  |
| H  | 4.72814000  | 3.11629600  | 1.89243300  |
| H  | 3.21215200  | 3.09787200  | 2.78696700  |
| C  | 2.64251400  | 3.40565700  | 0.07285700  |
| H  | 2.03529300  | 3.16085200  | -0.80525500 |
| H  | 2.06546200  | 4.07706100  | 0.71776200  |
| H  | 3.52000700  | 3.95634100  | -0.28122000 |
| H  | 5.64680200  | 2.35284800  | 0.03191600  |
| H  | 6.92414400  | 0.91764700  | -1.51595800 |
| H  | 5.85503300  | -1.05606000 | -2.53953700 |
| C  | -1.75713200 | 2.85867500  | -1.13135200 |
| C  | -0.81756600 | 0.92003500  | 0.17706700  |
| H  | -0.76412900 | 0.56054300  | 1.23730600  |
| H  | 0.13819000  | 1.37903000  | -0.11190100 |
| H  | -0.70704500 | 3.17845100  | -1.17817200 |
| C  | -1.91885300 | 5.25406300  | 1.03846500  |
| C  | -1.26368100 | 3.99529400  | 1.63181000  |
| C  | -2.11301500 | 2.72421400  | 1.44657100  |
| C  | -2.00480600 | 5.32499500  | -0.49291800 |
| C  | -1.94960300 | 1.94630200  | 0.10351900  |
| C  | -2.64864700 | 4.12188000  | -1.21611800 |
| H  | -2.92960400 | 5.33951500  | 1.46124800  |
| H  | -0.25544900 | 3.85553900  | 1.21973500  |
| H  | -3.16859600 | 3.00457100  | 1.54375500  |
| H  | -0.99639800 | 5.46638300  | -0.90865200 |
| H  | -1.37270700 | 6.13760100  | 1.39003000  |
| H  | -1.12792400 | 4.16113200  | 2.70704100  |
| H  | -1.92627400 | 2.02783300  | 2.27364700  |
| H  | -2.56439200 | 6.23106100  | -0.75510600 |
| H  | -2.88872100 | 1.39195500  | -0.01615800 |
| H  | -1.91512800 | 2.25315700  | -2.03171600 |
| H  | 2.15515600  | 1.62094200  | 1.15952000  |
| H  | 2.49346100  | -2.31068700 | -1.59948700 |
| C  | 4.23179900  | -3.14802900 | -2.50327800 |

|                          |             |             |             |
|--------------------------|-------------|-------------|-------------|
| H                        | 3.66163700  | -4.00396900 | -2.87825200 |
| H                        | 4.99631700  | -2.92242000 | -3.25295900 |
| H                        | 4.74388300  | -3.45515000 | -1.58578000 |
| C                        | 2.64043400  | -1.50138400 | -3.58530900 |
| H                        | 3.40415700  | -1.14495000 | -4.28404700 |
| H                        | 2.10769400  | -2.32986100 | -4.06555900 |
| H                        | 1.93348600  | -0.67986600 | -3.42769300 |
| C                        | -2.90978700 | 4.48037900  | -2.68864500 |
| H                        | -1.97049200 | 4.69244800  | -3.21363200 |
| H                        | -3.41027000 | 3.66240000  | -3.21810600 |
| H                        | -3.54257600 | 5.36899200  | -2.77306000 |
| H                        | -3.62096300 | 3.90546800  | -0.74892200 |
| C                        | -0.46634900 | -1.78509200 | -1.38224600 |
| C                        | -1.17395900 | -0.59359800 | -1.64529200 |
| H                        | 0.46144100  | -1.94246400 | -1.92549600 |
| H                        | -1.03638000 | -2.68080400 | -1.16634300 |
| H                        | -0.64570300 | 0.16431400  | -2.21922000 |
| C                        | -2.67552100 | -0.54898200 | -1.79974400 |
| H                        | -3.02936400 | 0.48367000  | -1.79338900 |
| H                        | -2.83593500 | -0.89293900 | -2.83472200 |
| C                        | -3.53227200 | -1.39860500 | -0.85739200 |
| H                        | -3.25196400 | -2.45476500 | -0.94053100 |
| H                        | -3.33129300 | -1.10038400 | 0.18094800  |
| C                        | -5.03285100 | -1.25673300 | -1.14951100 |
| H                        | -5.32490200 | -0.20122300 | -1.06107000 |
| H                        | -5.23362300 | -1.54319400 | -2.18958200 |
| C                        | -5.91249300 | -2.10905100 | -0.21584000 |
| H                        | -5.69024200 | -1.83151000 | 0.82638800  |
| H                        | -5.64613900 | -3.16831500 | -0.32315800 |
| C                        | -7.38424300 | -1.93037900 | -0.47684200 |
| H                        | -7.77301200 | -0.92070800 | -0.33698400 |
| C                        | -8.21373400 | -2.89789500 | -0.86664800 |
| H                        | -9.26788800 | -2.70892700 | -1.04445300 |
| H                        | -7.87047500 | -3.91903500 | -1.01716200 |
| <b>4P, -1655.8181861</b> |             |             |             |
| O                        | 1.72360000  | -0.51981800 | -0.44927000 |
| C                        | 0.09838600  | -0.87387600 | 3.18506700  |
| C                        | 1.49031500  | -0.61358200 | 2.94075800  |
| C                        | 2.04407700  | -1.75029900 | 2.28391900  |
| C                        | 0.98576900  | -2.70422200 | 2.09896400  |
| C                        | -0.20353600 | -2.17406300 | 2.69173400  |
| C                        | -0.82798500 | 0.01444200  | 3.96943600  |
| C                        | 2.23203000  | 0.61364200  | 3.39423400  |
| C                        | 3.48703600  | -1.96280500 | 1.92556400  |

|    |             |             |             |
|----|-------------|-------------|-------------|
| C  | 1.13627800  | -4.07981000 | 1.51430000  |
| C  | -1.49875400 | -2.90768700 | 2.87520800  |
| C  | 2.86129800  | -0.48366300 | -1.21944900 |
| C  | 3.72763000  | 0.62673000  | -1.11838000 |
| C  | 4.86362900  | 0.63254900  | -1.93611600 |
| C  | 5.13548700  | -0.41656100 | -2.80861700 |
| C  | 4.26229100  | -1.49990800 | -2.88693800 |
| C  | 3.10708400  | -1.56238200 | -2.10269100 |
| C  | 3.44393600  | 1.81411800  | -0.20787800 |
| C  | 2.12760700  | -2.72108000 | -2.23905500 |
| H  | -0.70852300 | -0.17719000 | 5.04293200  |
| H  | -1.87754500 | -0.16804900 | 3.72621900  |
| H  | -0.62146100 | 1.07602400  | 3.80915800  |
| H  | 2.47666000  | 0.52972800  | 4.46036400  |
| H  | 1.63916900  | 1.52621000  | 3.27649700  |
| H  | 3.17032500  | 0.74916200  | 2.85460200  |
| H  | 3.60269800  | -2.55443400 | 1.01457400  |
| H  | 3.99695800  | -2.50018000 | 2.73415000  |
| H  | 4.01524100  | -1.01995700 | 1.77237500  |
| H  | 1.35774600  | -4.80226200 | 2.30975300  |
| H  | 1.95644700  | -4.13064200 | 0.79483400  |
| H  | 0.22491300  | -4.41429300 | 1.01280500  |
| H  | -2.36564400 | -2.24365900 | 2.81713100  |
| H  | -1.52022100 | -3.38023500 | 3.86484300  |
| H  | -1.62868200 | -3.70118400 | 2.13619000  |
| Ti | 0.50919100  | -0.78136900 | 0.83042900  |
| C  | 4.63226500  | 2.14367000  | 0.71588500  |
| H  | 4.95318500  | 1.27192400  | 1.29551800  |
| H  | 5.49928700  | 2.49185400  | 0.14641600  |
| H  | 4.36246200  | 2.94144500  | 1.41562900  |
| C  | 3.04151200  | 3.05221300  | -1.03473900 |
| H  | 2.17296700  | 2.84592200  | -1.66769300 |
| H  | 2.79830900  | 3.89376800  | -0.37740200 |
| H  | 3.85990700  | 3.36778400  | -1.68975400 |
| H  | 5.54563900  | 1.47571900  | -1.88874900 |
| H  | 6.02505500  | -0.39036600 | -3.43010100 |
| H  | 4.48298500  | -2.30996600 | -3.57347700 |
| C  | -1.28925800 | 2.83847300  | -1.00240600 |
| C  | -1.61734500 | 0.77697500  | 0.47139800  |
| H  | -2.21960800 | 0.36754300  | 1.28966600  |
| H  | -0.60824700 | 0.99256400  | 0.93462800  |
| H  | -0.22067200 | 2.65980100  | -0.80873300 |
| C  | -0.89587700 | 5.21730100  | 1.16894600  |
| C  | -1.01697900 | 3.84346800  | 1.85001300  |

|   |             |             |             |
|---|-------------|-------------|-------------|
| C | -2.26426400 | 3.05357400  | 1.40763400  |
| C | -0.57890400 | 5.21034800  | -0.33348900 |
| C | -2.12992600 | 2.19887400  | 0.12291300  |
| C | -1.48756900 | 4.35546900  | -1.24354000 |
| H | -1.83722300 | 5.75807000  | 1.33752600  |
| H | -0.09956300 | 3.25670400  | 1.68556300  |
| H | -3.08171400 | 3.76954300  | 1.26602800  |
| H | 0.45759000  | 4.87551900  | -0.48483300 |
| H | -0.12030300 | 5.80188700  | 1.67860900  |
| H | -1.07664800 | 4.00638200  | 2.93276600  |
| H | -2.59764300 | 2.39678900  | 2.22138400  |
| H | -0.60970000 | 6.24867600  | -0.68544700 |
| H | -3.14835100 | 2.05585700  | -0.25985800 |
| H | -1.51072100 | 2.30423800  | -1.93376700 |
| H | 2.59246700  | 1.55387300  | 0.43184200  |
| H | 1.58333200  | -2.80634900 | -1.29236800 |
| C | 2.80866400  | -4.07748200 | -2.48993700 |
| H | 2.06628300  | -4.88091300 | -2.45014500 |
| H | 3.27715200  | -4.12608100 | -3.47768900 |
| H | 3.58070800  | -4.28898100 | -1.74315300 |
| C | 1.09129500  | -2.42002800 | -3.34302000 |
| H | 1.58187200  | -2.33002300 | -4.31774800 |
| H | 0.35220900  | -3.22589300 | -3.41301600 |
| H | 0.56195900  | -1.48093400 | -3.15235300 |
| C | -1.20837800 | 4.69229900  | -2.71779800 |
| H | -0.17521000 | 4.44330400  | -2.98984600 |
| H | -1.87221300 | 4.13586600  | -3.38784500 |
| H | -1.35282100 | 5.75904200  | -2.91435300 |
| H | -2.53721200 | 4.61219300  | -1.03798700 |
| C | -1.04901300 | -1.65271300 | -0.17817200 |
| C | -1.55053400 | -0.26806500 | -0.68300500 |
| H | -0.72436000 | -2.28083100 | -1.01198700 |
| H | -1.80994500 | -2.17586100 | 0.40012000  |
| H | -0.84663700 | 0.10262200  | -1.43834000 |
| C | -2.92048200 | -0.41522700 | -1.41492300 |
| H | -3.14022600 | 0.53045200  | -1.92550300 |
| H | -2.77640600 | -1.15879400 | -2.20751900 |
| C | -4.12987300 | -0.81821300 | -0.56064600 |
| H | -3.93042400 | -1.76443500 | -0.04140500 |
| H | -4.31305800 | -0.06870000 | 0.22148300  |
| C | -5.40497100 | -0.97511700 | -1.40265900 |
| H | -5.61514600 | -0.03206300 | -1.92565400 |
| H | -5.23952900 | -1.72767600 | -2.18413900 |
| C | -6.63423700 | -1.37938400 | -0.56713100 |

|   |             |             |             |
|---|-------------|-------------|-------------|
| H | -6.78241500 | -0.62920700 | 0.22455000  |
| H | -6.43949500 | -2.33403900 | -0.06182000 |
| C | -7.88873700 | -1.49114100 | -1.39114500 |
| H | -8.21051200 | -0.57765900 | -1.89344000 |
| C | -8.60386700 | -2.60470800 | -1.54929400 |
| H | -9.50100600 | -2.62578000 | -2.16039500 |
| H | -8.32204200 | -3.53793700 | -1.06657900 |

**Table S6** Optimized Cartesian coordinates (Å) and zero-point energy corrected energy (a.u.) of **7C<sub>12</sub>**, **7TS<sub>12</sub>**, **7P<sub>12</sub>**, **7C<sub>cyc</sub>**, **7TS<sub>cyc</sub>** and **7P<sub>cyc</sub>**, as well as the imaginary frequency (cm<sup>-1</sup>) of **7TS<sub>12</sub>**, and **7TS<sub>cyc</sub>**.

| Atom                                  | x           | y           | z           |
|---------------------------------------|-------------|-------------|-------------|
| <b>7C<sub>12</sub>, -1968.7060065</b> |             |             |             |
| O                                     | -2.40607300 | -0.37180900 | -0.16755300 |
| C                                     | -0.07021200 | -0.89241100 | -3.49467000 |
| C                                     | -1.48523500 | -0.61411500 | -3.56406100 |
| C                                     | -2.17390200 | -1.65630600 | -2.87666900 |
| C                                     | -1.19499000 | -2.52115200 | -2.30483600 |
| C                                     | 0.10686100  | -2.07307100 | -2.73961400 |
| C                                     | 1.00619800  | -0.14474000 | -4.22952300 |
| C                                     | -2.13267000 | 0.44068100  | -4.41823600 |
| C                                     | -3.65877500 | -1.86531100 | -2.81859500 |
| C                                     | -1.47595000 | -3.80810900 | -1.57829100 |
| C                                     | 1.37245200  | -2.86486000 | -2.58027400 |
| C                                     | -3.58248900 | -0.52256000 | 0.53018600  |
| C                                     | -4.70203500 | 0.26933500  | 0.18248900  |
| C                                     | -5.86429800 | 0.11628300  | 0.94661400  |
| C                                     | -5.92812600 | -0.78698900 | 2.00326300  |
| C                                     | -4.81599300 | -1.56376000 | 2.31530500  |
| C                                     | -3.62252800 | -1.45502600 | 1.59400300  |
| C                                     | -4.66864100 | 1.28993700  | -0.94883400 |
| C                                     | -2.40958700 | -2.28520200 | 1.99482100  |
| H                                     | 1.13823200  | -0.56966200 | -5.23239700 |
| H                                     | 1.97073400  | -0.20300700 | -3.72045200 |
| H                                     | 0.76277100  | 0.91187900  | -4.36948800 |
| H                                     | -2.36166500 | 0.02924600  | -5.40880100 |
| H                                     | -1.48444600 | 1.30534800  | -4.57724200 |
| H                                     | -3.07348300 | 0.79889000  | -3.99234900 |
| H                                     | -3.99890500 | -2.16812000 | -1.82514600 |
| H                                     | -3.94718900 | -2.65751400 | -3.52039000 |
| H                                     | -4.20704500 | -0.96555600 | -3.10079000 |
| H                                     | -1.55625200 | -4.63525000 | -2.29493300 |
| H                                     | -2.41606900 | -3.76597100 | -1.02361500 |
| H                                     | -0.67993800 | -4.06790300 | -0.87532700 |
| H                                     | 2.25578600  | -2.28124300 | -2.84019300 |

|    |             |             |             |
|----|-------------|-------------|-------------|
| H  | 1.34230200  | -3.73286500 | -3.25059000 |
| H  | 1.50799400  | -3.25188300 | -1.56605900 |
| Ti | -0.95265200 | -0.49048600 | -1.20771800 |
| C  | -5.89983400 | 1.20195400  | -1.87144300 |
| H  | -6.06103200 | 0.18487600  | -2.24045200 |
| H  | -6.81401200 | 1.51480100  | -1.35813100 |
| H  | -5.77466600 | 1.86559200  | -2.73362600 |
| C  | -4.52139000 | 2.72369200  | -0.39763300 |
| H  | -3.63543600 | 2.82788900  | 0.23617900  |
| H  | -4.44829000 | 3.45040100  | -1.21444700 |
| H  | -5.39014900 | 2.99396000  | 0.21116000  |
| H  | -6.73614200 | 0.71703100  | 0.70844200  |
| H  | -6.84169700 | -0.88622800 | 2.58094100  |
| H  | -4.87334600 | -2.26649700 | 3.14014800  |
| C  | 4.45764600  | 1.62848000  | 0.20036200  |
| C  | 3.03255500  | -0.32173300 | -0.62958400 |
| H  | 3.09859000  | -1.34978000 | -0.99966100 |
| H  | 2.61352000  | 0.27126900  | -1.45558500 |
| H  | 3.70991400  | 2.22216200  | -0.34951300 |
| C  | 6.33080000  | 2.22405100  | -2.38581900 |
| C  | 5.33132000  | 1.09001500  | -2.66678300 |
| C  | 5.35640700  | -0.02450900 | -1.60242300 |
| C  | 6.02319600  | 3.11966400  | -1.17747700 |
| C  | 4.46900600  | 0.18285800  | -0.34906700 |
| C  | 5.79028600  | 2.41562800  | 0.17708900  |
| H  | 7.32472900  | 1.77379200  | -2.25577100 |
| H  | 4.31670100  | 1.49929400  | -2.78166400 |
| H  | 6.39699000  | -0.16162700 | -1.28473800 |
| H  | 5.13535300  | 3.73266600  | -1.39550000 |
| H  | 6.40607800  | 2.86398600  | -3.27380000 |
| H  | 5.58623600  | 0.64898300  | -3.63796500 |
| H  | 5.06947900  | -0.97923900 | -2.06263800 |
| H  | 6.85316100  | 3.82858900  | -1.06618500 |
| H  | 4.89676400  | -0.45971500 | 0.43269600  |
| H  | 4.09749100  | 1.59035100  | 1.23602700  |
| H  | -3.78797800 | 1.07127000  | -1.56197300 |
| C  | -2.75073300 | -3.76255400 | 2.26303100  |
| H  | -1.83380200 | -4.33445300 | 2.43860700  |
| H  | -3.37858100 | -3.88332000 | 3.15091800  |
| H  | -3.27931100 | -4.21561100 | 1.41849000  |
| C  | -1.70293600 | -1.65968700 | 3.21555300  |
| H  | -2.36134700 | -1.66760200 | 4.09039200  |
| H  | -0.79783600 | -2.22113300 | 3.47183800  |
| H  | -1.42183700 | -0.61800700 | 3.02821300  |

|   |             |             |             |
|---|-------------|-------------|-------------|
| C | 5.80483400  | 3.45632300  | 1.30917800  |
| H | 4.98749800  | 4.17870700  | 1.18901700  |
| H | 5.68855000  | 2.98252700  | 2.28984900  |
| H | 6.74278900  | 4.02033700  | 1.31946000  |
| H | 6.61901900  | 1.71573300  | 0.35904500  |
| C | 0.59355300  | -0.57635900 | 0.15771600  |
| C | 2.04260800  | -0.27955100 | 0.55226700  |
| H | -0.05172100 | -0.43271100 | 1.03453000  |
| H | 0.46013700  | -1.65016600 | -0.15960200 |
| H | 2.02209500  | 0.75101900  | 0.93167500  |
| C | 2.49028300  | -1.14407700 | 1.76604100  |
| H | 3.43793100  | -0.74151200 | 2.14436400  |
| H | 1.76229800  | -0.99908200 | 2.57524900  |
| C | 2.65982100  | -2.64867100 | 1.51387100  |
| H | 1.72598100  | -3.07201300 | 1.11472000  |
| H | 3.42683700  | -2.81871600 | 0.74697800  |
| C | 3.04569100  | -3.42074400 | 2.78335400  |
| H | 3.97695800  | -3.00486800 | 3.19140700  |
| H | 2.28052800  | -3.26798800 | 3.55586400  |
| C | 3.22500500  | -4.93180600 | 2.54468800  |
| H | 3.98752000  | -5.07466700 | 1.76414300  |
| H | 2.29222400  | -5.35816200 | 2.15249000  |
| C | 3.63566800  | -5.67606000 | 3.78651700  |
| H | 4.58256800  | -5.36867800 | 4.23273800  |
| C | 2.93294300  | -6.65012800 | 4.36446400  |
| H | 3.27995400  | -7.14945200 | 5.26393000  |
| H | 1.98509400  | -6.99150300 | 3.95371400  |
| C | -0.77280900 | 1.84555100  | -1.75776100 |
| C | 0.00622600  | 1.99611000  | -0.64381600 |
| H | -0.30652100 | 1.83123000  | -2.73462900 |
| H | -1.83773600 | 2.06404300  | -1.71936700 |
| H | 1.08543200  | 1.96846700  | -0.77480500 |
| C | -0.48550400 | 2.43466900  | 0.70162700  |
| H | -1.54689100 | 2.19718300  | 0.81958000  |
| H | 0.06241200  | 1.91535400  | 1.49518700  |
| C | -0.26556600 | 3.96006600  | 0.87271900  |
| H | 0.79504500  | 4.19689500  | 0.71646900  |
| H | -0.82272600 | 4.49355100  | 0.09274500  |
| C | -0.70481100 | 4.45370500  | 2.25776900  |
| H | -1.76207700 | 4.20777900  | 2.41984000  |
| H | -0.14023200 | 3.91644300  | 3.03196200  |
| C | -0.50683700 | 5.97082300  | 2.43964000  |
| H | -1.08719500 | 6.51222400  | 1.68220700  |
| H | 0.55106000  | 6.21111700  | 2.25692800  |



|                                                 |             |             |             |
|-------------------------------------------------|-------------|-------------|-------------|
| C                                               | -0.89954100 | 6.44472700  | 3.81331900  |
| H                                               | -0.33552900 | 6.01703100  | 4.64349900  |
| C                                               | -1.86966000 | 7.32170900  | 4.07076300  |
| H                                               | -2.45495500 | 7.77620600  | 3.27447200  |
| H                                               | -2.10971700 | 7.62652700  | 5.08477800  |
| H                                               | -1.70190500 | -2.26838800 | 1.15972400  |
| <b>7TS<sub>12</sub>, -1968.7054388, i149.89</b> |             |             |             |
| O                                               | 2.42961000  | -0.16564700 | 0.14725500  |
| C                                               | 0.19441000  | -0.71117600 | 3.53044000  |
| C                                               | 1.58241900  | -0.33099200 | 3.56466600  |
| C                                               | 2.33433600  | -1.34896000 | 2.89886600  |
| C                                               | 1.41389600  | -2.30880000 | 2.38825400  |
| C                                               | 0.09212500  | -1.93078800 | 2.81951300  |
| C                                               | -0.92668800 | -0.01029700 | 4.24470900  |
| C                                               | 2.16500000  | 0.80342400  | 4.35994900  |
| C                                               | 3.83003800  | -1.45007300 | 2.82368400  |
| C                                               | 1.77290300  | -3.60008900 | 1.70590500  |
| C                                               | -1.12447200 | -2.80509200 | 2.70274100  |
| C                                               | 3.61393800  | -0.28679300 | -0.54079500 |
| C                                               | 4.67445200  | 0.60235500  | -0.24901100 |
| C                                               | 5.85062000  | 0.47079500  | -0.99512200 |
| C                                               | 5.98036400  | -0.50007400 | -1.98423000 |
| C                                               | 4.92237500  | -1.36588600 | -2.24691200 |
| C                                               | 3.71923600  | -1.28476900 | -1.53788800 |
| C                                               | 4.54956700  | 1.70156300  | 0.79898200  |
| C                                               | 2.55690200  | -2.20546300 | -1.88798900 |
| H                                               | -1.03486000 | -0.41265800 | 5.25956600  |
| H                                               | -1.88629600 | -0.14229800 | 3.73888500  |
| H                                               | -0.74731100 | 1.06263600  | 4.35167900  |
| H                                               | 2.42105900  | 0.46001300  | 5.36966200  |
| H                                               | 1.46455400  | 1.63389500  | 4.47436300  |
| H                                               | 3.08010200  | 1.19594300  | 3.90939600  |
| H                                               | 4.17372100  | -1.81453500 | 1.85272400  |
| H                                               | 4.19116800  | -2.15159600 | 3.58576100  |
| H                                               | 4.31324700  | -0.48998400 | 3.01063700  |
| H                                               | 1.90388700  | -4.39649800 | 2.44933500  |
| H                                               | 2.70829400  | -3.51896100 | 1.14800600  |
| H                                               | 0.99465300  | -3.93216200 | 1.01328400  |
| H                                               | -2.04562800 | -2.25590900 | 2.90065800  |
| H                                               | -1.06065000 | -3.61413900 | 3.44101100  |
| H                                               | -1.21432800 | -3.27917800 | 1.72093600  |
| Ti                                              | 1.01491500  | -0.31685000 | 1.23328700  |
| C                                               | 5.80029100  | 1.83583200  | 1.68768500  |
| H                                               | 6.08789000  | 0.87877700  | 2.13341200  |

|   |             |             |             |
|---|-------------|-------------|-------------|
| H | 6.66118200  | 2.21084100  | 1.12603700  |
| H | 5.61267900  | 2.54922500  | 2.49703800  |
| C | 4.21753200  | 3.05497200  | 0.13579800  |
| H | 3.30874500  | 2.99676600  | -0.47147100 |
| H | 4.07827900  | 3.83617700  | 0.89145000  |
| H | 5.03142200  | 3.37100400  | -0.52476700 |
| H | 6.68014600  | 1.14202400  | -0.79843100 |
| H | 6.90342700  | -0.58125100 | -2.54954800 |
| H | 5.03116500  | -2.11750800 | -3.02188300 |
| C | -4.71366200 | 1.21557300  | -0.33990700 |
| C | -3.04221900 | -0.47793900 | 0.58589700  |
| H | -2.96581900 | -1.49128300 | 0.99402600  |
| H | -2.72781100 | 0.19684400  | 1.39560000  |
| H | -4.06271700 | 1.93020300  | 0.18802400  |
| C | -6.68627700 | 1.64822600  | 2.20439400  |
| C | -5.54199300 | 0.67831500  | 2.54166400  |
| C | -5.39642100 | -0.47201100 | 1.52612100  |
| C | -6.49038100 | 2.52766900  | 0.96148500  |
| C | -4.53075000 | -0.19326200 | 0.27133400  |
| C | -6.14373100 | 1.80778400  | -0.35996100 |
| H | -7.60578400 | 1.05819200  | 2.08625100  |
| H | -4.59635500 | 1.23027000  | 2.64723000  |
| H | -6.40281500 | -0.76737100 | 1.20628600  |
| H | -5.69987100 | 3.26731500  | 1.15973300  |
| H | -6.86205400 | 2.30724200  | 3.06367800  |
| H | -5.74592400 | 0.24609600  | 3.52864100  |
| H | -4.98441600 | -1.35703200 | 2.02883500  |
| H | -7.40964600 | 3.10803000  | 0.81370500  |
| H | -4.85202900 | -0.92244900 | -0.48512900 |
| H | -4.33961100 | 1.18469700  | -1.37105600 |
| H | 3.71358600  | 1.43603600  | 1.45454000  |
| C | 2.98388500  | -3.66863000 | -2.10376000 |
| H | 2.10122000  | -4.30208000 | -2.23911400 |
| H | 3.60255800  | -3.78672800 | -2.99842600 |
| H | 3.55338400  | -4.05419700 | -1.25248600 |
| C | 1.80022200  | -1.67322900 | -3.12326700 |
| H | 2.44933600  | -1.67581700 | -4.00499400 |
| H | 0.92882500  | -2.29860600 | -3.34685100 |
| H | 1.45882900  | -0.64322600 | -2.97440200 |
| C | -6.28864000 | 2.78831600  | -1.53578500 |
| H | -5.58222500 | 3.62255400  | -1.44063300 |
| H | -6.09428900 | 2.29537900  | -2.49444000 |
| H | -7.29619100 | 3.21380200  | -1.57690000 |
| H | -6.86385000 | 0.99144700  | -0.51758400 |

|   |             |             |             |
|---|-------------|-------------|-------------|
| C | -0.58683200 | -0.41410200 | -0.15165100 |
| C | -2.05112700 | -0.34133700 | -0.58866200 |
| H | 0.07266200  | -0.37139400 | -1.02479000 |
| H | -0.41344400 | -1.40483400 | 0.36784600  |
| H | -2.17643700 | 0.65807700  | -1.02415600 |
| C | -2.33454000 | -1.32739900 | -1.75842600 |
| H | -3.33220900 | -1.10450000 | -2.15505200 |
| H | -1.63397600 | -1.10125600 | -2.57304300 |
| C | -2.25442500 | -2.82594400 | -1.43430200 |
| H | -1.26269500 | -3.07153400 | -1.02556100 |
| H | -2.98181400 | -3.08295000 | -0.65326500 |
| C | -2.51138800 | -3.70959300 | -2.66296800 |
| H | -3.50022000 | -3.47290700 | -3.07859500 |
| H | -1.78518000 | -3.46869600 | -3.45049800 |
| C | -2.43657400 | -5.21650900 | -2.35319200 |
| H | -3.16127400 | -5.44669500 | -1.55762100 |
| H | -1.44404800 | -5.46362000 | -1.95354200 |
| C | -2.72344700 | -6.07619600 | -3.55464700 |
| H | -3.71028100 | -5.95165800 | -4.00268100 |
| C | -1.87098000 | -6.94642500 | -4.09550700 |
| H | -2.13398700 | -7.53849800 | -4.96669500 |
| H | -0.87781400 | -7.10611200 | -3.68099100 |
| C | 0.63697400  | 1.84105700  | 1.63213300  |
| C | -0.24865000 | 1.78944900  | 0.54534500  |
| H | 0.21853800  | 1.95368600  | 2.62471000  |
| H | 1.62143600  | 2.27904500  | 1.48060700  |
| H | -1.30928200 | 1.77066000  | 0.77619500  |
| C | 0.12529600  | 2.33615500  | -0.81060900 |
| H | 1.17984800  | 2.12898900  | -1.02036400 |
| H | -0.46550400 | 1.86589000  | -1.60279500 |
| C | -0.12374900 | 3.86241900  | -0.85501300 |
| H | -1.17348100 | 4.06871900  | -0.60685000 |
| H | 0.48048200  | 4.35169500  | -0.08107200 |
| C | 0.20703700  | 4.46200300  | -2.22847800 |
| H | 1.25362100  | 4.24945100  | -2.48214100 |
| H | -0.40287200 | 3.96967800  | -2.99824400 |
| C | -0.02589900 | 5.98385000  | -2.28839900 |
| H | 0.59805200  | 6.48268700  | -1.53633400 |
| H | -1.07180000 | 6.18966200  | -2.01621400 |
| C | 0.26170800  | 6.56054800  | -3.64866100 |
| H | -0.35193000 | 6.17957900  | -4.46634200 |
| C | 1.19681100  | 7.47372700  | -3.90981000 |
| H | 1.82902700  | 7.88431000  | -3.12560700 |
| H | 1.36025300  | 7.85298900  | -4.91391600 |

|                                       |             |             |             |
|---------------------------------------|-------------|-------------|-------------|
| H                                     | 1.85950900  | -2.19776600 | -1.04330100 |
| <b>7P<sub>12</sub>, -1968.7286435</b> |             |             |             |
| O                                     | 2.47237800  | -0.03478700 | 0.03792400  |
| C                                     | 0.55409100  | -0.96751400 | 3.53594600  |
| C                                     | 1.88549900  | -0.44910400 | 3.53824700  |
| C                                     | 2.70568200  | -1.33432900 | 2.75687200  |
| C                                     | 1.87095400  | -2.37361600 | 2.25046100  |
| C                                     | 0.54051600  | -2.14550200 | 2.73366800  |
| C                                     | -0.61215500 | -0.42020900 | 4.30707700  |
| C                                     | 2.37919400  | 0.71914600  | 4.34239700  |
| C                                     | 4.19840000  | -1.26189400 | 2.60707200  |
| C                                     | 2.32868100  | -3.56629000 | 1.45786700  |
| C                                     | -0.62131300 | -3.08486100 | 2.55911800  |
| C                                     | 3.59099800  | -0.02824900 | -0.76002300 |
| C                                     | 4.59027800  | 0.94333000  | -0.52503400 |
| C                                     | 5.70490100  | 0.93297500  | -1.37055700 |
| C                                     | 5.82639700  | 0.00543900  | -2.40193600 |
| C                                     | 4.82267200  | -0.93710500 | -2.61199700 |
| C                                     | 3.68412600  | -0.98035100 | -1.80090500 |
| C                                     | 4.45288000  | 1.99980500  | 0.56456100  |
| C                                     | 2.55988700  | -1.96695200 | -2.09107300 |
| H                                     | -0.71563100 | -0.95353100 | 5.25996600  |
| H                                     | -1.55769600 | -0.53598600 | 3.76962200  |
| H                                     | -0.48642800 | 0.63812900  | 4.54522500  |
| H                                     | 2.70033000  | 0.38204600  | 5.33557700  |
| H                                     | 1.60381300  | 1.47408300  | 4.48945300  |
| H                                     | 3.23640700  | 1.20697200  | 3.87232400  |
| H                                     | 4.53073000  | -1.55891100 | 1.60951900  |
| H                                     | 4.67557700  | -1.93584100 | 3.32895900  |
| H                                     | 4.57830900  | -0.25735800 | 2.80003700  |
| H                                     | 2.58284500  | -4.39170600 | 2.13456500  |
| H                                     | 3.21956400  | -3.34458600 | 0.86633900  |
| H                                     | 1.55497400  | -3.93580100 | 0.77917600  |
| H                                     | -1.58218800 | -2.58307800 | 2.69520700  |
| H                                     | -0.56479800 | -3.88341300 | 3.30919300  |
| H                                     | -0.62597500 | -3.56727300 | 1.57843300  |
| Ti                                    | 1.22182100  | -0.36202600 | 1.26511300  |
| C                                     | 5.75719100  | 2.23313100  | 1.34885100  |
| H                                     | 6.16807900  | 1.29853700  | 1.74325000  |
| H                                     | 6.52922400  | 2.69829000  | 0.72836700  |
| H                                     | 5.57406400  | 2.90968000  | 2.19008100  |
| C                                     | 3.93476700  | 3.32677600  | -0.02887500 |
| H                                     | 2.98211400  | 3.18969200  | -0.54972600 |
| H                                     | 3.79204900  | 4.07423200  | 0.75925300  |

|   |             |             |             |
|---|-------------|-------------|-------------|
| H | 4.64970500  | 3.73404200  | -0.75127900 |
| H | 6.49053800  | 1.66613700  | -1.22066700 |
| H | 6.70117300  | 0.01915500  | -3.04446800 |
| H | 4.92447300  | -1.64902900 | -3.42432300 |
| C | -5.13712200 | 0.88743600  | -0.60378000 |
| C | -3.31361400 | -0.44199300 | 0.58509200  |
| H | -3.11872200 | -1.39225800 | 1.10093200  |
| H | -3.15479200 | 0.34706300  | 1.33455100  |
| H | -4.62361500 | 1.73756600  | -0.12943900 |
| C | -7.30740100 | 1.29621800  | 1.77763500  |
| C | -6.06395900 | 0.54229000  | 2.27657600  |
| C | -5.69850800 | -0.67653000 | 1.40668900  |
| C | -7.15611400 | 2.05974200  | 0.45448300  |
| C | -4.80388600 | -0.40988400 | 0.16979900  |
| C | -6.63089300 | 1.26228900  | -0.75908400 |
| H | -8.12776800 | 0.57108300  | 1.68287000  |
| H | -5.21159800 | 1.23160000  | 2.36343800  |
| H | -6.63218200 | -1.14645000 | 1.07533200  |
| H | -6.48898100 | 2.92165500  | 0.60573400  |
| H | -7.62599900 | 2.00951400  | 2.54785200  |
| H | -6.26739300 | 0.19187600  | 3.29551300  |
| H | -5.19953300 | -1.43388800 | 2.02579000  |
| H | -8.13532900 | 2.48315900  | 0.19825400  |
| H | -4.97299600 | -1.25315800 | -0.51423500 |
| H | -4.69732000 | 0.80203600  | -1.60552500 |
| H | 3.70193500  | 1.64425500  | 1.27800600  |
| C | 3.06009400  | -3.37516800 | -2.45776300 |
| H | 2.21380500  | -4.06418700 | -2.54514100 |
| H | 3.58023100  | -3.38518600 | -3.42029400 |
| H | 3.74707800  | -3.77082700 | -1.70342300 |
| C | 1.63409200  | -1.41316800 | -3.19504900 |
| H | 2.18283200  | -1.29724900 | -4.13526900 |
| H | 0.79537700  | -2.09367100 | -3.37878200 |
| H | 1.23254700  | -0.42974000 | -2.92857300 |
| C | -6.83371700 | 2.08322900  | -2.04362900 |
| H | -6.25483200 | 3.01459900  | -2.00971800 |
| H | -6.51394700 | 1.52505900  | -2.93022600 |
| H | -7.88535700 | 2.35404000  | -2.18032600 |
| H | -7.22100800 | 0.33921800  | -0.85810600 |
| C | -0.83949400 | -0.10090000 | 0.04681900  |
| C | -2.27595500 | -0.27040000 | -0.54547800 |
| H | -0.11962600 | -0.41300000 | -0.73014800 |
| H | -0.81777300 | -0.84124400 | 0.88441800  |
| H | -2.48791400 | 0.67347500  | -1.05965100 |

|                                        |             |             |             |
|----------------------------------------|-------------|-------------|-------------|
| C                                      | -2.33048100 | -1.37461300 | -1.62482100 |
| H                                      | -3.32905000 | -1.35945700 | -2.07692400 |
| H                                      | -1.63765400 | -1.09998200 | -2.43166400 |
| C                                      | -2.01758800 | -2.80722100 | -1.16903900 |
| H                                      | -1.00769300 | -2.85016100 | -0.73266600 |
| H                                      | -2.70909200 | -3.11117500 | -0.37262300 |
| C                                      | -2.09903700 | -3.82432200 | -2.31570400 |
| H                                      | -3.10715100 | -3.79784400 | -2.75047800 |
| H                                      | -1.41358800 | -3.53023400 | -3.12146700 |
| C                                      | -1.77105600 | -5.26356300 | -1.87646100 |
| H                                      | -2.46143400 | -5.54929800 | -1.06846700 |
| H                                      | -0.75868900 | -5.29954300 | -1.45121200 |
| C                                      | -1.87742800 | -6.25824900 | -3.00080800 |
| H                                      | -2.86073900 | -6.34681700 | -3.46458800 |
| C                                      | -0.87450400 | -7.00741000 | -3.45836400 |
| H                                      | -1.01045500 | -7.70706700 | -4.27723900 |
| H                                      | 0.12180100  | -6.95576200 | -3.02391500 |
| C                                      | 0.52163400  | 1.52215600  | 1.65644600  |
| C                                      | -0.54091100 | 1.38329400  | 0.52105400  |
| H                                      | 0.07285600  | 1.73313300  | 2.62547900  |
| H                                      | 1.27906500  | 2.27525800  | 1.42997900  |
| H                                      | -1.49042300 | 1.71154500  | 0.95944900  |
| C                                      | -0.21248100 | 2.25884500  | -0.70586600 |
| H                                      | 0.81678300  | 2.04770200  | -1.02553000 |
| H                                      | -0.85707200 | 1.97120200  | -1.54601900 |
| C                                      | -0.38401800 | 3.76330900  | -0.45466900 |
| H                                      | -1.42155900 | 3.96035000  | -0.15000500 |
| H                                      | 0.24550500  | 4.07702400  | 0.38836300  |
| C                                      | -0.04367700 | 4.61586600  | -1.68403200 |
| H                                      | 0.99316300  | 4.42525300  | -1.99120700 |
| H                                      | -0.67429100 | 4.30653300  | -2.52908100 |
| C                                      | -0.22438700 | 6.12612900  | -1.44038400 |
| H                                      | 0.41876700  | 6.44602900  | -0.61072800 |
| H                                      | -1.26156400 | 6.30730700  | -1.12079300 |
| C                                      | 0.07524800  | 6.95404700  | -2.66086100 |
| H                                      | -0.54921800 | 6.75735900  | -3.53370100 |
| C                                      | 1.03212000  | 7.87829800  | -2.74372600 |
| H                                      | 1.67615000  | 8.11065500  | -1.89835900 |
| H                                      | 1.20290100  | 8.44439100  | -3.65436100 |
| H                                      | 1.96161700  | -2.06947300 | -1.17692500 |
| <b>7C<sub>cyc</sub>, -1655.8212888</b> |             |             |             |
| O                                      | -2.28954800 | 0.13287100  | -0.28170400 |
| C                                      | 0.53444200  | -0.34758900 | 2.61307900  |
| C                                      | -0.08906000 | -1.62561700 | 2.51636000  |

|    |             |             |             |
|----|-------------|-------------|-------------|
| C  | -1.50875500 | -1.43324000 | 2.53666100  |
| C  | -1.76165000 | -0.03543900 | 2.63875900  |
| C  | -0.49583800 | 0.63834600  | 2.68375800  |
| C  | 2.00803100  | -0.10903400 | 2.76613100  |
| C  | 0.61427900  | -2.95125200 | 2.61456300  |
| C  | -2.54826700 | -2.51706100 | 2.60404100  |
| C  | -3.10655300 | 0.60441000  | 2.82740800  |
| C  | -0.31446000 | 2.10467900  | 2.94960500  |
| C  | -3.54728500 | 0.59159600  | -0.60135700 |
| C  | -4.57257100 | -0.34455400 | -0.87428400 |
| C  | -5.83205200 | 0.15566000  | -1.22138600 |
| C  | -6.07620200 | 1.52392500  | -1.29209900 |
| C  | -5.05015700 | 2.42373500  | -1.01787400 |
| C  | -3.76769300 | 1.98821100  | -0.66881300 |
| C  | -4.32402100 | -1.84684400 | -0.86914000 |
| C  | -2.65597500 | 3.00126100  | -0.42871400 |
| H  | 2.31345300  | -0.30231500 | 3.80199800  |
| H  | 2.28019100  | 0.92177300  | 2.53564700  |
| H  | 2.60577400  | -0.76289800 | 2.12505100  |
| H  | 0.64054800  | -3.27622600 | 3.66210800  |
| H  | 1.65145800  | -2.89438600 | 2.27524300  |
| H  | 0.10902100  | -3.74436300 | 2.05566900  |
| H  | -3.48774100 | -2.21970100 | 2.13333900  |
| H  | -2.77232600 | -2.75113300 | 3.65239000  |
| H  | -2.21555500 | -3.44946300 | 2.13908800  |
| H  | -3.37045500 | 0.60652300  | 3.89226000  |
| H  | -3.89627500 | 0.07235100  | 2.29278000  |
| H  | -3.11759900 | 1.64131000  | 2.48625500  |
| H  | 0.68959100  | 2.45089100  | 2.69836500  |
| H  | -0.46978500 | 2.30575500  | 4.01678900  |
| H  | -1.03147400 | 2.71843300  | 2.39835000  |
| Ti | -0.78391700 | -0.38372200 | 0.53596500  |
| C  | -5.44530900 | -2.64707300 | -0.18139800 |
| H  | -5.64952400 | -2.27484400 | 0.82770900  |
| H  | -6.38251100 | -2.60485100 | -0.74418600 |
| H  | -5.16446200 | -3.70268800 | -0.10636100 |
| C  | -4.09447400 | -2.36001700 | -2.30668600 |
| H  | -3.28669500 | -1.81394200 | -2.80590100 |
| H  | -3.84644100 | -3.42729200 | -2.30722400 |
| H  | -4.99628500 | -2.22657600 | -2.91282200 |
| H  | -6.63499500 | -0.53928200 | -1.44420900 |
| H  | -7.06213500 | 1.88808900  | -1.56332200 |
| H  | -5.24792900 | 3.48868600  | -1.08001300 |
| C  | 4.84619300  | -0.28928900 | -0.69129800 |

|   |             |             |             |
|---|-------------|-------------|-------------|
| C | 3.03104500  | 1.50109400  | -0.54164500 |
| H | 2.76728400  | 2.51105600  | -0.88407800 |
| H | 3.10504100  | 1.56363800  | 0.55127000  |
| H | 4.54237900  | -0.47899900 | 0.34967400  |
| C | 7.37366400  | 1.22375700  | 0.67010800  |
| C | 6.11540600  | 2.10673700  | 0.68936100  |
| C | 5.44468600  | 2.24693500  | -0.69101200 |
| C | 7.15094700  | -0.27585500 | 0.42888700  |
| C | 4.43170500  | 1.14414600  | -1.09481500 |
| C | 6.34024300  | -0.67067300 | -0.82464100 |
| H | 8.05075400  | 1.61458400  | -0.10217900 |
| H | 5.40024900  | 1.73367000  | 1.43664500  |
| H | 6.23757400  | 2.29629200  | -1.44724200 |
| H | 6.65116700  | -0.71540100 | 1.30560600  |
| H | 7.90733400  | 1.33874900  | 1.62174700  |
| H | 6.40906200  | 3.10513100  | 1.03422100  |
| H | 4.92816900  | 3.21300000  | -0.75135000 |
| H | 8.13543000  | -0.75749200 | 0.37553800  |
| H | 4.37912800  | 1.17355900  | -2.19137500 |
| H | 4.25838600  | -0.98814000 | -1.30171100 |
| H | -3.40735100 | -2.02612200 | -0.30039800 |
| H | -1.85711300 | 2.49461300  | 0.12031200  |
| C | -3.10104000 | 4.20312600  | 0.42481800  |
| H | -2.23879600 | 4.83591800  | 0.65939500  |
| H | -3.82570000 | 4.83374200  | -0.09900700 |
| H | -3.55930300 | 3.88642400  | 1.36750500  |
| C | -2.06492300 | 3.47908800  | -1.77192200 |
| H | -2.82154400 | 4.00801100  | -2.36082600 |
| H | -1.22737300 | 4.16520200  | -1.60598400 |
| H | -1.70746600 | 2.63838700  | -2.37516100 |
| C | 6.47780900  | -2.18201600 | -1.07353100 |
| H | 6.05972200  | -2.75736000 | -0.23736700 |
| H | 5.95260800  | -2.48750100 | -1.98548300 |
| H | 7.52697200  | -2.47484300 | -1.18003000 |
| H | 6.76243800  | -0.15100800 | -1.69712700 |
| C | 0.55872200  | 1.09237400  | -0.17625500 |
| C | 1.83845900  | 0.57025500  | -0.89852100 |
| H | -0.07473100 | 1.63421100  | -0.88756400 |
| H | 0.83495900  | 1.80702500  | 0.59928800  |
| H | 2.09564100  | -0.43659800 | -0.53715400 |
| C | 1.64019600  | 0.52817100  | -2.43467800 |
| H | 1.47951800  | 1.56529800  | -2.75552400 |
| H | 2.57550500  | 0.21322700  | -2.91332000 |
| C | 0.49213100  | -0.33517100 | -2.99013000 |



|                                                  |             |             |             |
|--------------------------------------------------|-------------|-------------|-------------|
| H                                                | -0.38816900 | -0.25006300 | -2.33985700 |
| H                                                | 0.16932600  | 0.09030000  | -3.94723700 |
| C                                                | 0.83360600  | -1.81349000 | -3.25894300 |
| H                                                | 1.55026900  | -1.85827200 | -4.08703000 |
| C                                                | -0.69928200 | -2.56172000 | -0.72612600 |
| C                                                | 0.63063800  | -2.77675800 | -0.85600900 |
| H                                                | -1.30991900 | -2.25957900 | -1.56993100 |
| H                                                | -1.22149400 | -2.93750700 | 0.15200500  |
| H                                                | 1.16757000  | -3.18437200 | -0.00063600 |
| C                                                | 1.45118000  | -2.59669000 | -2.09317400 |
| H                                                | 2.42499800  | -2.17904800 | -1.81219100 |
| H                                                | 1.68908400  | -3.62050500 | -2.42692700 |
| H                                                | -0.06380800 | -2.33292200 | -3.61766100 |
| <b>7TS<sub>eye</sub>, -1655.8104259, i239.95</b> |             |             |             |
| O                                                | -1.90259100 | -0.55135700 | 0.06784600  |
| C                                                | -0.74750300 | 2.86001500  | -1.72905300 |
| C                                                | -1.66935600 | 3.42293100  | -0.80965200 |
| C                                                | -2.87289500 | 2.64444700  | -0.85272200 |
| C                                                | -2.70240300 | 1.61749100  | -1.83155800 |
| C                                                | -1.37712000 | 1.73027500  | -2.35388400 |
| C                                                | 0.58569900  | 3.43476300  | -2.11380600 |
| C                                                | -1.47835400 | 4.69942700  | -0.04188800 |
| C                                                | -4.15152400 | 2.96831100  | -0.13347800 |
| C                                                | -3.76202000 | 0.66068700  | -2.29776200 |
| C                                                | -0.79363400 | 0.92430700  | -3.48177200 |
| C                                                | -2.64814800 | -1.70778900 | 0.02608900  |
| C                                                | -3.81421500 | -1.79072600 | 0.82484800  |
| C                                                | -4.53955400 | -2.98576400 | 0.78850300  |
| C                                                | -4.13983800 | -4.05642900 | -0.00677200 |
| C                                                | -2.99393600 | -3.94458500 | -0.78720800 |
| C                                                | -2.22160200 | -2.77712700 | -0.79386200 |
| C                                                | -4.26295900 | -0.65405200 | 1.73490900  |
| C                                                | -0.96781100 | -2.71818600 | -1.65753700 |
| H                                                | 0.46435000  | 4.13778700  | -2.94684400 |
| H                                                | 1.28823000  | 2.66598900  | -2.44682600 |
| H                                                | 1.05287500  | 3.98932100  | -1.29494300 |
| H                                                | -1.86358800 | 5.54446600  | -0.62578300 |
| H                                                | -0.42510400 | 4.90946500  | 0.16223200  |
| H                                                | -2.01841500 | 4.70708300  | 0.90881500  |
| H                                                | -4.78359400 | 2.08753900  | -0.00219600 |
| H                                                | -4.73015600 | 3.70091100  | -0.70989800 |
| H                                                | -3.97737700 | 3.40745600  | 0.85286200  |
| H                                                | -4.35414800 | 1.12007300  | -3.09854000 |
| H                                                | -4.45087600 | 0.38618100  | -1.49593900 |

|    |             |             |             |
|----|-------------|-------------|-------------|
| H  | -3.33555700 | -0.26326500 | -2.69278900 |
| H  | 0.28961400  | 0.80568000  | -3.38899300 |
| H  | -0.98140300 | 1.42747000  | -4.43837800 |
| H  | -1.23573200 | -0.07097200 | -3.54687300 |
| Ti | -1.20706500 | 1.08531500  | -0.10585600 |
| C  | -5.77612600 | -0.37879800 | 1.65577700  |
| H  | -6.10524100 | -0.21539600 | 0.62435500  |
| H  | -6.36584900 | -1.20557000 | 2.06291000  |
| H  | -6.02774900 | 0.51212000  | 2.24046800  |
| C  | -3.83555800 | -0.92272000 | 3.19310400  |
| H  | -2.75555800 | -1.08515800 | 3.27231800  |
| H  | -4.10968100 | -0.08297800 | 3.84142900  |
| H  | -4.32862300 | -1.81940100 | 3.58254000  |
| H  | -5.43384200 | -3.08045200 | 1.39569200  |
| H  | -4.71985100 | -4.97384500 | -0.01738900 |
| H  | -2.68738700 | -4.78292400 | -1.40515300 |
| C  | 5.15165100  | -0.17017200 | 0.89403600  |
| C  | 2.99144100  | -0.29056300 | -0.45624100 |
| H  | 2.41580000  | -0.93577600 | -1.13559300 |
| H  | 3.24143500  | 0.61575100  | -1.02570100 |
| H  | 5.10368400  | 0.89018200  | 0.60328500  |
| C  | 7.39726400  | -0.35359600 | -1.44212200 |
| C  | 5.97586500  | -0.35526000 | -2.02805500 |
| C  | 5.05527500  | -1.41629300 | -1.39426100 |
| C  | 7.53691900  | 0.13411300  | 0.00695300  |
| C  | 4.31299600  | -1.01229100 | -0.09481900 |
| C  | 6.64317600  | -0.54803100 | 1.06551800  |
| H  | 7.79634800  | -1.37479400 | -1.51793500 |
| H  | 5.53109700  | 0.64712600  | -1.94918900 |
| H  | 5.65817500  | -2.31016100 | -1.19372800 |
| H  | 7.34080500  | 1.21609300  | 0.04733400  |
| H  | 8.04381500  | 0.26799100  | -2.07386300 |
| H  | 6.05322500  | -0.56150500 | -3.10215200 |
| H  | 4.30235700  | -1.73514700 | -2.12683000 |
| H  | 8.58634100  | 0.01085400  | 0.30258500  |
| H  | 4.05034500  | -1.95159900 | 0.40994700  |
| H  | 4.66691700  | -0.22713100 | 1.87735100  |
| H  | -3.75542700 | 0.25698600  | 1.40388400  |
| H  | -0.53007300 | -1.71995900 | -1.55036500 |
| C  | -1.28981500 | -2.93092300 | -3.15049900 |
| H  | -0.38921300 | -2.80363600 | -3.76038500 |
| H  | -1.66969700 | -3.94047800 | -3.33519300 |
| H  | -2.04981500 | -2.22935000 | -3.50924200 |
| C  | 0.08456300  | -3.74356100 | -1.18906600 |

|                                        |             |             |             |
|----------------------------------------|-------------|-------------|-------------|
| H                                      | -0.27332400 | -4.76819800 | -1.33137900 |
| H                                      | 1.01136500  | -3.63561300 | -1.76273200 |
| H                                      | 0.31972600  | -3.62391600 | -0.12760100 |
| C                                      | 7.12353100  | -0.16103500 | 2.47424000  |
| H                                      | 7.02985500  | 0.91982500  | 2.63786200  |
| H                                      | 6.53848200  | -0.66718600 | 3.24992000  |
| H                                      | 8.17500400  | -0.42628200 | 2.62259800  |
| H                                      | 6.74714900  | -1.63866400 | 0.96699600  |
| C                                      | 0.94824600  | 0.99644800  | 0.18447500  |
| C                                      | 2.06936700  | 0.10554900  | 0.73335600  |
| H                                      | 0.51385000  | 0.44084000  | -0.71288300 |
| H                                      | 1.40031100  | 1.89683500  | -0.23273100 |
| H                                      | 2.67285500  | 0.74895900  | 1.37903700  |
| C                                      | 1.63501200  | -1.13803700 | 1.53870300  |
| H                                      | 1.37596700  | -1.93801600 | 0.83406500  |
| H                                      | 2.51382900  | -1.49985000 | 2.08518500  |
| C                                      | 0.46212100  | -0.98201400 | 2.51794300  |
| H                                      | -0.46096100 | -0.83710000 | 1.95045700  |
| H                                      | 0.32960100  | -1.93904800 | 3.03668800  |
| C                                      | 0.58232900  | 0.11576600  | 3.58353000  |
| H                                      | 1.39953500  | -0.12063000 | 4.27513700  |
| C                                      | -1.44925200 | 1.89604800  | 1.90936000  |
| C                                      | -0.04199700 | 2.07216000  | 1.94437800  |
| H                                      | -1.87276600 | 1.11920700  | 2.54162500  |
| H                                      | -2.05946700 | 2.78601000  | 1.81294800  |
| H                                      | 0.31445200  | 3.01982500  | 1.54574300  |
| C                                      | 0.83142600  | 1.54100600  | 3.05993200  |
| H                                      | 1.88275300  | 1.68813100  | 2.80951000  |
| H                                      | 0.63974100  | 2.25131200  | 3.87964600  |
| H                                      | -0.33081300 | 0.10572200  | 4.19085900  |
| <b>7P<sub>cycs</sub> -1655.8360702</b> |             |             |             |
| O                                      | 2.21023300  | 0.41235600  | 0.14718100  |
| C                                      | 0.22741700  | -2.17158900 | -2.21278900 |
| C                                      | 1.23553800  | -3.01919300 | -1.66866900 |
| C                                      | 2.49067900  | -2.34337100 | -1.79382100 |
| C                                      | 2.26486400  | -1.09615300 | -2.46431000 |
| C                                      | 0.86417300  | -0.98313100 | -2.70766100 |
| C                                      | -1.22309600 | -2.53036900 | -2.39154900 |
| C                                      | 1.03796800  | -4.42707800 | -1.19176800 |
| C                                      | 3.82823500  | -2.90280300 | -1.40100900 |
| C                                      | 3.32671800  | -0.12541200 | -2.89592900 |
| C                                      | 0.17297400  | 0.13714200  | -3.43577800 |
| C                                      | 3.07792900  | 1.46744700  | 0.28312800  |
| C                                      | 4.32699900  | 1.23469100  | 0.90219200  |

|    |             |             |             |
|----|-------------|-------------|-------------|
| C  | 5.18384800  | 2.33072400  | 1.04545900  |
| C  | 4.81962600  | 3.59980000  | 0.60058400  |
| C  | 3.57891300  | 3.79808200  | -0.00003200 |
| C  | 2.67916000  | 2.74165300  | -0.17743200 |
| C  | 4.70755300  | -0.13672700 | 1.44580700  |
| C  | 1.30433900  | 2.98939900  | -0.78510300 |
| H  | -1.36122100 | -3.06358100 | -3.34012400 |
| H  | -1.86859900 | -1.64867000 | -2.42551000 |
| H  | -1.58840300 | -3.18870900 | -1.59904100 |
| H  | 1.00363300  | -5.10762300 | -2.05134800 |
| H  | 0.10048200  | -4.55661900 | -0.64363700 |
| H  | 1.85615600  | -4.76042900 | -0.55017100 |
| H  | 4.56845500  | -2.11612500 | -1.24137200 |
| H  | 4.21128000  | -3.55353100 | -2.19689800 |
| H  | 3.77020600  | -3.50183800 | -0.48863300 |
| H  | 3.72711200  | -0.41957400 | -3.87350900 |
| H  | 4.16311400  | -0.09197000 | -2.19433000 |
| H  | 2.93910000  | 0.89079100  | -2.99194000 |
| H  | -0.82478800 | 0.34113100  | -3.03570100 |
| H  | 0.04485700  | -0.12621000 | -4.49295300 |
| H  | 0.74610200  | 1.06563800  | -3.40025900 |
| Ti | 1.20886800  | -0.95758700 | -0.39318200 |
| C  | 6.17450500  | -0.51299100 | 1.17278300  |
| H  | 6.42471900  | -0.42515000 | 0.11048600  |
| H  | 6.87154200  | 0.11925700  | 1.73131800  |
| H  | 6.36095400  | -1.54607300 | 1.48320400  |
| C  | 4.39149200  | -0.22508800 | 2.95400300  |
| H  | 3.33811000  | -0.00474300 | 3.15639300  |
| H  | 4.61429300  | -1.22615700 | 3.33882100  |
| H  | 4.99268000  | 0.49428500  | 3.51980500  |
| H  | 6.15087500  | 2.19061900  | 1.51698700  |
| H  | 5.50168400  | 4.43495300  | 0.72548300  |
| H  | 3.30307700  | 4.79300000  | -0.33465700 |
| C  | -5.28738600 | -0.11900600 | 0.63713300  |
| C  | -2.91116700 | 0.77293800  | 0.40966700  |
| H  | -2.30426600 | 1.68818800  | 0.46586800  |
| H  | -2.83918800 | 0.41643300  | -0.62959800 |
| H  | -4.96961300 | -0.76609000 | -0.19475700 |
| C  | -6.83910400 | 1.54133600  | -1.68296500 |
| C  | -5.34050600 | 1.88367000  | -1.65684600 |
| C  | -4.82982100 | 2.28763600  | -0.25991600 |
| C  | -7.25676500 | 0.25267600  | -0.96062300 |
| C  | -4.38904200 | 1.13951300  | 0.68304300  |
| C  | -6.81464300 | 0.09861800  | 0.51084800  |

|   |             |             |             |
|---|-------------|-------------|-------------|
| H | -7.38756600 | 2.38988900  | -1.25070600 |
| H | -4.75321500 | 1.04657800  | -2.06181900 |
| H | -5.61906400 | 2.86844700  | 0.23208400  |
| H | -6.87816000 | -0.61678700 | -1.51899900 |
| H | -7.17189000 | 1.47019900  | -2.72597900 |
| H | -5.17346500 | 2.72276500  | -2.34277800 |
| H | -3.98468200 | 2.98068800  | -0.36346700 |
| H | -8.35069900 | 0.18223000  | -1.00716100 |
| H | -4.44623500 | 1.54479400  | 1.70232600  |
| H | -5.09600000 | -0.69896600 | 1.54891600  |
| H | 4.08274400  | -0.87946600 | 0.93873600  |
| H | 0.87649400  | 2.01549900  | -1.05216400 |
| C | 1.35952800  | 3.82741800  | -2.07541400 |
| H | 0.36380400  | 3.89738400  | -2.52545200 |
| H | 1.69715300  | 4.84999600  | -1.88176500 |
| H | 2.04025500  | 3.39104200  | -2.81370400 |
| C | 0.36147800  | 3.63872700  | 0.24938900  |
| H | 0.73386500  | 4.62332700  | 0.55011900  |
| H | -0.64180400 | 3.77389900  | -0.16943900 |
| H | 0.27882000  | 3.02903600  | 1.15524500  |
| C | -7.56670600 | -1.07753400 | 1.15590700  |
| H | -7.31943600 | -2.02288300 | 0.65688200  |
| H | -7.31008200 | -1.18366200 | 2.21548800  |
| H | -8.65063700 | -0.94239400 | 1.08649500  |
| H | -7.09056200 | 1.01063100  | 1.06041400  |
| C | -0.85746800 | -0.66001200 | 0.85702300  |
| C | -2.28361500 | -0.28439000 | 1.34419100  |
| H | -0.18336400 | 0.14823500  | 1.17740200  |
| H | -0.93901400 | -0.62773900 | -0.25868900 |
| H | -2.88079500 | -1.19839800 | 1.26093500  |
| C | -2.28160800 | 0.19301200  | 2.83672100  |
| H | -2.51039500 | 1.26448200  | 2.85100100  |
| H | -3.11145600 | -0.29413800 | 3.36159900  |
| C | -0.98447100 | 0.00116700  | 3.64464700  |
| H | -0.16893000 | 0.55143100  | 3.15839600  |
| H | -1.11482900 | 0.49893600  | 4.61184900  |
| C | -0.55166400 | -1.45794100 | 3.89636700  |
| H | -1.07018200 | -1.84184300 | 4.78300600  |
| C | 1.20005600  | -2.23059500 | 1.21495100  |
| C | -0.33969000 | -2.07212700 | 1.33238200  |
| H | 1.72081700  | -1.70515800 | 2.02324400  |
| H | 1.50423000  | -3.27511900 | 1.19515400  |
| H | -0.80443100 | -2.80272400 | 0.65926600  |
| C | -0.85443400 | -2.43672300 | 2.75500500  |

|   |             |             |            |
|---|-------------|-------------|------------|
| H | -1.93928400 | -2.57408300 | 2.68422100 |
| H | -0.44362500 | -3.42127700 | 3.00324000 |
| H | 0.51548100  | -1.47846700 | 4.14703300 |
